# Supplementary material for: Management of acute musculoskeletal pain (excluding low back pain): protocol for a systematic review and network meta-analysis of randomised trials
Source: PubMed Central journal article supplement — BMJ Open. 2019 Apr 3;9(4):e024441. doi: 10.1136/bmjopen-2018-024441 (PMC6500323; doi:10.1136/bmjopen-2018-024441), 2019-04-03
Supplement: bmjopen-2018-024441.draft_revisions.pdf [file bmjopen-2018-024441.draft_revisions.pdf]

# BMJ Open

BMJ Open is committed to open peer review. As part of this commitment we make the peer review history of every article we publish publicly available.

When an article is published we post the peer reviewers' comments and the authors' responses online. We also post the versions of the paper that were used during peer review. These are the versions that the peer review comments apply to.

The versions of the paper that follow are the versions that were submitted during the peer review process. They are not the versions of record or the final published versions. They should not be cited or distributed as the published version of this manuscript.

BMJ Open is an open access journal and the full, final, typeset and author-corrected version of record of the manuscript is available on our site with no access controls, subscription charges or pay-per-view fees (<http://bmjopen.bmj.com>).

If you have any questions on BMJ Open's open peer review process please email [editorial.bmjopen@bmj.com](mailto:editorial.bmjopen@bmj.com)

# BMJ Open

## Management of acute musculoskeletal pain (excluding low back pain): a protocol for a systematic review and network meta-analysis of randomised trials

|                               |                                                                                                                                                                                                                                                                                                                                                                                                                                                                                                                                                                                                                                           |
|-------------------------------|-------------------------------------------------------------------------------------------------------------------------------------------------------------------------------------------------------------------------------------------------------------------------------------------------------------------------------------------------------------------------------------------------------------------------------------------------------------------------------------------------------------------------------------------------------------------------------------------------------------------------------------------|
| Journal:                      | <i>BMJ Open</i>                                                                                                                                                                                                                                                                                                                                                                                                                                                                                                                                                                                                                           |
| Manuscript ID                 | bmjopen-2018-024441                                                                                                                                                                                                                                                                                                                                                                                                                                                                                                                                                                                                                       |
| Article Type:                 | Protocol                                                                                                                                                                                                                                                                                                                                                                                                                                                                                                                                                                                                                                  |
| Date Submitted by the Author: | 25-May-2018                                                                                                                                                                                                                                                                                                                                                                                                                                                                                                                                                                                                                               |
| Complete List of Authors:     | Busse, Jason; McMaster University, Anesthesia; McMaster University, Clinical Epidemiology & Biostatistics<br>Craigie, Samantha; McMaster University<br>Sadeghirad, Behnam; McMaster University<br>Couban, Rachel; McMaster University, Michael G. DeGroote Institute for Pain Research and Care<br>Hong, Patrick; University of Ottawa Faculty of Medicine<br>Oparin, Yvgeniy; McMaster University Department of Medicine<br>May, Curtis; University of British Columbia Faculty of Medicine<br>Lok, Annie; McMaster University Department of Anaesthesia<br>Guyatt, Gordon; McMaster University, Clinical Epidemiology and Biostatistics |
| Keywords:                     | acute pain, musculoskeletal, intervention, systematic review, network meta-analysis                                                                                                                                                                                                                                                                                                                                                                                                                                                                                                                                                       |
|                               |                                                                                                                                                                                                                                                                                                                                                                                                                                                                                                                                                                                                                                           |

SCHOLARONE™  
Manuscripts

## Management of acute musculoskeletal pain (excluding low back pain): a protocol for a systematic review and network meta-analysis of randomised trials

Jason W. Busse, \*<sup>1,2,3,4</sup> [bussejw@mcmaster.ca](mailto:bussejw@mcmaster.ca)  
Samantha Craigie, <sup>2</sup> [scraigie@mcmaster.ca](mailto:scraigie@mcmaster.ca)  
Behnam Sadeghirad, <sup>2,3</sup> [sadeghb@mcmaster.ca](mailto:sadeghb@mcmaster.ca)  
Rachel Couban, <sup>3</sup> [rcouban@mcmaster.ca](mailto:rcouban@mcmaster.ca)  
Patrick J Hong, <sup>5</sup> [phong030@uottawa.ca](mailto:phong030@uottawa.ca)  
Yvgeniy Oparin, <sup>6</sup> [oparin@mcmaster.ca](mailto:oparin@mcmaster.ca)  
Curtis May, <sup>7</sup> [c\\_may@shaw.ca](mailto:c_may@shaw.ca)  
Annie Lok, <sup>3</sup> [lokaym@mcmaster.ca](mailto:lokaym@mcmaster.ca)  
Gordon H. Guyatt, <sup>2</sup> [guyatt@mcmaster.ca](mailto:guyatt@mcmaster.ca)

<sup>1</sup> Department of Anesthesia, McMaster University, Hamilton, Ontario, Canada

<sup>2</sup> Department of Health Research Methods, Evidence, and Impact, McMaster University, Hamilton, Ontario, Canada

<sup>3</sup> Michael G. DeGroote Institute for Pain Research and Care, McMaster University, Hamilton, Ontario, Canada

<sup>4</sup> The Michael G. DeGroote Centre for Medicinal Cannabis Research, McMaster University, Hamilton, Ontario, Canada

<sup>5</sup> University of Ottawa, Faculty of Medicine, Ottawa, Ontario, Canada

<sup>6</sup> Michael G. DeGroote School of Medicine, McMaster University, Hamilton, Ontario, Canada

<sup>7</sup> School of Medicine, University of British Columbia, Vancouver, British Columbia, Canada

**\*Corresponding Author:** Jason W. Busse, Department of Anesthesia, Michael G. DeGroote School of Medicine, McMaster University, HSC-2V9, 1280 Main St. West, Hamilton, Canada, L8S 4K1

Tel: [905-525-9140](tel:905-525-9140) (x21731)

Fax: [905-523-1224](tel:905-523-1224)

Email: [bussejw@mcmaster.ca](mailto:bussejw@mcmaster.ca)

1  
2  
3 **Word count: 2,627**  
4  
5  
6  
7  
8  
9  
10  
11  
12  
13  
14  
15  
16  
17  
18  
19  
20  
21  
22  
23  
24  
25  
26  
27  
28  
29  
30  
31  
32  
33  
34  
35  
36  
37  
38  
39  
40  
41  
42  
43  
44  
45  
46  
47  
48  
49  
50  
51  
52  
53  
54  
55  
56  
57  
58  
59  
60

For peer review only

## Abstract

**Introduction:** Acute, non-low back related musculoskeletal pain is common and associated with significant socioeconomic costs. No review has evaluated all interventional studies for acute musculoskeletal pain, which limits attempts to make inferences regarding the relative effectiveness of treatments.

**Methods and analysis:** We will conduct a systematic review of all randomised controlled trials evaluating therapies for acute musculoskeletal pain (excluding low back pain). We will identify eligible, English-language, trials by a systematic search of CINAHL, EMBASE, MEDLINE, PEDro and the Cochrane Central Registry of Controlled Trials. Eligible trials will: (1) enrol patients presenting with acute, non-low back related musculoskeletal pain, and (2) randomise patients to alternative interventions or an intervention and a placebo/sham arm. Fractures will be considered ineligible, unless they are non-surgical and therapy is directed at pain relief. Pairs of reviewers will, independently and in duplicate, screen titles and abstracts of identified citations, review the full texts of potentially eligible trials and extract information from eligible trials. We will use a modified Cochrane instrument to evaluate risk of bias.

We will use the Grading of Recommendations Assessment, Development and Evaluation (GRADE) system to evaluate the quality of evidence supporting treatment effects. When possible, we will conduct: (1) in direct comparisons, a random-effects meta-analysis to establish the effectiveness of therapeutic interventions on patient-important outcomes; and (2) multiple treatment comparison meta-analysis within a frequentist framework to assess the relative effects of treatments. We will use a priori hypotheses to explain heterogeneity between studies and conduct meta-regression and subgroup analyses consistent with current best practices. We will interpret subgroup results according to published credibility criteria.

1  
2  
3 **Ethics and dissemination:** No research ethics approval is required for this systematic review.  
4

5 The results of this systematic review will be disseminated through publication in a peer-reviewed  
6 journal, conference presentations, and will inform a clinical practice guideline.  
7  
8  
9

10  
11  
12 **Key Words:** acute pain; musculoskeletal; intervention; systematic review; network metanalysis  
13  
14

15  
16  
17 **PROSPERO registration number:** CRD42018094412  
18  
19  
20  
21  
22  
23  
24  
25  
26  
27  
28  
29  
30  
31  
32  
33  
34  
35  
36  
37  
38  
39  
40  
41  
42  
43  
44  
45  
46  
47  
48  
49  
50  
51  
52  
53  
54  
55  
56  
57  
58  
59  
60

## Article Summary

### Strengths and limitations

- Our broad study eligibility criteria will increase generalizability of our results.
- We will use the Grading of Recommendations Assessment, Development and Evaluation (GRADE) approach to evaluate our confidence in treatment effects.
- We will optimize interpretability by presenting risk differences and measures of relative effect for all outcomes reported, and by presenting our findings with GRADE evidence profiles.
- Findings from our review will inform a clinical practice guideline and identify key areas for future research.
- Our results will be limited by possible shortcomings of the primary studies.

## Introduction

Acute non-low back related musculoskeletal (MSK) pain, which include strains and sprains, dislocations, and whiplash present for less than 1 month, are associated with considerable morbidity in North America. The Burden of Musculoskeletal Diseases in the United States, 3<sup>rd</sup> edition, found that sprains and strains are the most frequent injury type for which medical care is sought and the majority of MSK injuries occur among working-age adults.<sup>1</sup> In 2013 there were 2,807,880 emergency department (ED) visits for sports-related injuries in the US,<sup>2</sup> and over 70% of visits to the ED are because of pain-related complaints.<sup>3</sup> Management often yields suboptimal outcomes: a survey of 842 acute pain patients at 20 US and Canadian hospitals found 40% reported their pain did not change or increased after visiting the ED, and 74% of patients were discharged in moderate to severe pain.<sup>4</sup>

Despite the prevalence of acute MSK complaints in primary care, a number of studies have highlighted inadequate pain education of among physicians.<sup>5-7</sup> The availability of numerous pharmacologic and non-pharmacologic therapies complicates the management decisions. A recently published series of 24 systematic reviews of treatment for common acute MSK injuries,<sup>8</sup> suffers from many important limitations, including: (1) selection bias due, in part, to exclusion of studies deemed to be at high risk of bias without empirically exploring if effect estimates differed from studies assigned low risk of bias, (2) interpreting results from individual studies as effective if the mean difference in a given outcome met the minimally important difference (MID) and ineffective if not - an interpretation relies on the unlikely assumption that all patients will experience the same degree of improvement, and fails to consider the distribution around the mean and the proportion of patients that achieve the MID, (3) no appraisal of the overall quality (confidence, certainty) of the evidence, and (4) no



1  
2  
3 statistical pooling of treatment effects. We propose to conduct a systematic review of  
4  
5 randomized trials to assess the comparative effectiveness of available treatments for acute MSK  
6  
7 pain (excluding low back pain) and assess quality of evidence using GRADE methodology.  
8  
9  
10  
11  
12  
13  
14  
15  
16  
17  
18  
19  
20  
21  
22  
23  
24  
25  
26  
27  
28  
29  
30  
31  
32  
33  
34  
35  
36  
37  
38  
39  
40  
41  
42  
43  
44  
45  
46  
47  
48  
49  
50  
51  
52  
53  
54  
55  
56  
57  
58  
59  
60

For peer review only

## Methods

### *Protocol registration*

The protocol for this systematic review is registered with PROSPERO (CRD42018094412). This review was commissioned by the American Academy of Family Physicians and American College of Physicians and sponsored by the National Safety Council.

### *Standardized Reporting*

We used the PRISMA-P checklist when writing our report.<sup>9</sup>

### *Information sources*

We will identify eligible, English language, RCTs through a systematic search of MEDLINE, EMBASE, CINAHL, PEDro and CENTRAL, from inception of each database through February 2018. Our search has been refined for individual databases by an experienced medical librarian (Appendix). We will scan reference lists of relevant systematic reviews for additional articles.

### *Eligibility criteria and study selection*

We will include therapeutic randomized trials that: 1) enroll adult patients ( $\geq 18$  years) presenting with acute, non-low back related musculoskeletal (MSK) pain (pain with duration less than 4 weeks or defined by authors as “acute”) in an outpatient setting, and 2) randomise them to currently available alternative interventions directed at pain relief (pharmacological or non-pharmacological) or a currently available intervention directed at pain relief and a placebo/sham arm. Eligible MSK conditions include sprains and strains. Surgical fractures, non-surgical fractures unless therapy is directed at pain relief, low back pain, neuropathic pain, acute cancer

1  
2  
3 pain, acute postoperative pain, acute dental pain, pain associated with labour and delivery,  
4  
5 visceral pain, pain due to infection, and headaches will be excluded. We have excluded acute low  
6  
7 back pain on request by the study funder, as they have previously commissioned evidence  
8  
9 syntheses on this topic.<sup>10 11</sup>

12 Trained reviewers will work independently in pairs to screen titles and abstracts of  
13  
14 identified citations, using standardized, pilot-tested forms in DistillerSR, an online systematic  
15  
16 review software (Evidence Partners, Ottawa, Canada; <http://systematic-review.net/>). Teams of  
17  
18 reviewers will screen full texts of any articles judged as potentially eligible. Reviewers will  
19  
20 discuss disagreements to come to consensus, referring to an adjudicator if necessary. We will  
21  
22 measure agreement between reviewers to assess the reliability of full-text review; specifically,  
23  
24 we will calculate kappa ( $\kappa$ ) values, and interpret them using the following thresholds: <0.20 as  
25  
26 slight agreement, 0.21–0.40 as fair agreement, 0.41–0.60 as moderate agreement, 0.61–0.80 as  
27  
28 substantial agreement and >0.80 as almost perfect agreement.<sup>12</sup>

### 35 *Data abstraction*

36  
37 We designed standardized data abstraction forms and a detailed instruction video (accessible at:  
38  
39 <https://www.youtube.com/watch?v=1nwFJ61K3sQ>). We will conduct calibration exercises prior  
40  
41 to beginning data abstraction to ensure consistency and accuracy of extractions. Teams of  
42  
43 reviewers will extract data independently and in duplicate. We will extract the following data  
44  
45 from eligible trials into a standardized spreadsheet: study characteristics (e.g. the first author,  
46  
47 publication year, country of origin, and funding source), participant and trial characteristics (e.g.  
48  
49 sample size, mean age of participants, clinical condition, type and severity of injury, proportion  
50  
51 with known chronic pain/condition prior to acute injury, and the proportion receiving opioids at  
52  
53  
54  
55  
56  
57  
58  
59  
60

1  
2  
3 the time of enrollment), characteristics of interventions and comparators, patient-important  
4 outcomes (pain, function, health-related quality of life, patient satisfaction, return to work,  
5 proportion of patients with relief, re-injury and all reported adverse events). We used the longest  
6  
7  
8  
9  
10 follow-up reported.<sup>13</sup>  
11  
12  
13

#### 14 *Risk of bias assessment*

15  
16 Among eligible studies, we will independently assess the following risk of bias issues: (1)  
17 random sequence generation, (2) allocation concealment, (3) blinding of study participants,  
18 personnel, and outcome assessors, and (4) incomplete outcome data ( $\geq 20\%$  missing data will be  
19 considered at high risk of bias).<sup>14</sup> To assess the risk of bias we will use a modified version of the  
20  
21  
22  
23  
24  
25  
26  
27  
28  
29  
30  
31  
32  
33  
34  
35  
36  
37  
38  
39  
40  
41  
42  
43  
44  
45  
46  
47  
48  
49  
50  
51  
52  
53  
54  
55  
56  
57  
58  
59  
60  
Cochrane risk of bias instrument.<sup>15</sup> Our instrument will use the following responses: ‘definitely  
yes’ or ‘probably yes’ (considered as low risk of bias), or ‘definitely no’ or ‘probably no’  
(considered as high risk of bias). These response options have published evidence of validity for  
assessing blinding.<sup>15</sup> Any discrepancy in assessment of risk of bias will be resolved by  
discussion, or third party adjudication if needed. We will contact authors for missing information  
regarding risk of bias issues and unpublished data (e.g. effect estimates without accompanying  
estimates of precision).

#### 44 *Data synthesis*

45  
46  
47  
48  
49  
50  
51  
52  
53  
54  
55  
56  
57  
58  
59  
60  
For the purposes of statistical pooling, we will explore treatment effects of interventions across  
all MSK complaints eligible for this review. However, we will also explore if treatment effects  
differ by clinical condition or injury severity (see Subgroup analyses, meta-regression and  
sensitivity analysis, below). Clustering strategies for clinical condition and injury severity will be

1  
2  
3 informed by the trials eligible for our review, which will be reviewed by our technical expert  
4 panel (see Acknowledgement section), blinded to study results.  
5  
6  
7  
8  
9

### 10 *Methods for direct comparisons*

11  
12 We will pool dichotomous outcomes that are reported by >1 RCT and calculate the relative risk  
13 and risk difference (RD), using baseline risk estimates from the placebo arm of eligible studies,  
14 and the associated 95% confidence intervals (CIs). We will pool all continuous outcomes that are  
15 reported by >1 study and calculate the weighted mean differences (WMDs) and associated 95%  
16 CIs. We will employ methods described in Cochrane Handbook to estimate the mean and  
17 standard deviation (SD) when median, range, and sample size are reported, and to impute the SD  
18 if the standard error or SD for the differences are not reported.<sup>16</sup> For continuous outcomes, when  
19 studies reported effect estimates using different measurement instruments that tap into a common  
20 construct (e.g. pain), we will first transform all outcomes to a common instrument on a domain-  
21 by-domain basis.<sup>17</sup> We will use change scores from baseline to end of follow-up rather than end-  
22 of-study scores, in order to account for inter-patient variability. If authors do not report change  
23 scores, we will calculate them using the baseline and end-of-study score and a correlation  
24 coefficient derived from the largest trial at lowest risk of bias in the meta-analysis that does  
25 report a change score. We will use DerSimonian–Laird random-effects models<sup>18</sup> for all pairwise  
26 comparisons.  
27  
28  
29  
30  
31  
32  
33  
34  
35  
36  
37  
38  
39  
40  
41  
42  
43  
44  
45

46  
47 Interpreting effect estimates for continuous outcomes is challenging,<sup>19</sup> and we will  
48 present the minimally important difference (MID) for all pooled effect estimates. The MID is the  
49 smallest amount of improvement in a treatment outcome that a patient would recognize as  
50  
51  
52  
53  
54  
55  
56  
57  
58  
59  
60

1  
2  
3 important.<sup>20</sup> If we find multiple MID estimates are available, we will use the smallest difference  
4  
5 that has been validated.  
6

7  
8 However, simply presenting the MID risks interpreting all mean effects that fall below  
9  
10 the MID as unimportant, whereas we have found that, typically, mean differences of 1/2 the MID  
11  
12 result in RDs of about 10% - a potential benefit that many patients would likely consider  
13  
14 important.<sup>21</sup> Thus, concluding that an effect is unimportant requires confidence that the mean  
15  
16 difference is less than 1/2 the MID (and perhaps less). To optimize interpretability, we will  
17  
18 calculate the RD of achieving the MID, as well as the associated 95% CIs, for all statistically  
19  
20 significant WMDs. Specifically, for each individual study, we will assume that the SDs of  
21  
22 outcome measurements are the same in both the treatment and control groups, and that change  
23  
24 scores in both groups are normally distributed. We will use the median or mean, and SD of the  
25  
26 control group, with the established MID for the outcome in question to estimate the probability  
27  
28 of achieving  $\geq$ MID in the control group. We will use the pooled mean difference (and 95%CI) to  
29  
30 estimate the mean (and 95%CI) in the treatment group and calculate the probability (and 95%CI)  
31  
32 of achieving  $\geq$ MID in the treatment group. Finally, we will use risks in both groups to acquire  
33  
34 the RD for achieving  $\geq$ MID.  
35  
36  
37  
38  
39  
40  
41

#### 42 *Methods for network meta-analysis*

43  
44 We will perform network meta-analysis (NMA) to synthesize the available evidence from the  
45  
46 entire network of trials by integrating direct and indirect estimates for each comparison into a  
47  
48 single summary treatment effect. We will use a frequentist random-effects model using the  
49  
50 methodology of multivariable meta-analysis to assess the comparative effectiveness of eligible  
51  
52 interventions.<sup>22 23</sup>  
53  
54  
55  
56  
57  
58  
59  
60

1  
2  
3 Although the assumptions for network meta-analysis are similar to conventional meta-  
4 analysis, key extra assumptions are transitivity (there are no effect modifiers influencing the  
5 indirect comparisons) and coherence (direct and indirect effect estimates being similar).<sup>24</sup> We  
6 will identify issues of incoherence by comparing direct evidence (i.e. estimates from pairwise  
7 comparisons) with indirect evidence (i.e. estimates from network meta-analysis) using the node  
8 splitting method.<sup>25 26</sup> In this approach, incoherence is assessed locally by evaluating the  
9 consistency assumption in each closed loop of the network separately as the difference between  
10 direct and indirect estimates for a specific comparison in the loop. We will assume a common  
11 heterogeneity estimate within each loop. We will also confirm the coherence assumption in the  
12 entire network using 'design-by-treatment' model as described by Higgins et al.<sup>27</sup> In case we find  
13 significant incoherence in the network (highly significant p value from design-by-treatment  
14 model), we will perform network meta-analysis using inconsistency model. If using  
15 inconsistency model resulted in non-sensical results, we will explore the network for the  
16 source(s) of incoherence and further expand (disintegrating interventions based on differences in  
17 population or intervention characteristics) or exclude node(s) introducing incoherence in the  
18 network (e.g., excluding node(s) with less than 20 events for binary outcomes or comparisons  
19 with only one trial with very few participants for continuous outcomes).

20  
21 We will report our findings with probability statements of intervention effects.  
22 Probability rankings allow us to report a chance percentage of which interventions rank higher,<sup>28</sup>  
23 however, simplifying the results of a network down to probabilities can lead to  
24 misinterpretations, specifically, when particular comparisons (i.e. nodes) are not well-connected  
25 or when the quality of evidence varies between comparisons.<sup>29 30</sup> Following display of the rank  
26 probabilities using rankogram, we will use the surface under the cumulative ranking (SUCRA)

1  
2  
3 line to aid in interpretation of relative effect of the interventions. An intervention with a SUCRA  
4 value of 100 is certain to be the most effective, whereas an intervention with 0 is certain to be the  
5 least effective.<sup>28</sup> We will use STATA (StataCorp, Release 14.2, College Station, Texas, USA)  
6 for all statistical analyses. All comparisons will be 2-tailed using a threshold  $p \leq 0.05$ .  
7  
8  
9  
10  
11  
12  
13

#### 14 *Subgroup analyses, meta-regression and sensitivity analysis*

15 We will use the Q statistic and  $I^2$  to determine statistical heterogeneity for direct meta-analysis.<sup>25</sup>

16 We have developed five hypotheses to explain heterogeneity between trials: (1) different clinical  
17 conditions will show different treatment effects; (2) more severe injuries will show smaller  
18 treatment effects than less severe injuries; (3) older patients will show smaller treatment effects  
19 than younger patients; (4) longer follow-up will show smaller treatment effects than shorter  
20 follow-up; and (5) higher dose/intensity of treatment will show larger treatment effects. We will  
21 perform subgroup analyses regardless of heterogeneity estimates. Moreover, we will explore the  
22 effect of risk of bias (on a component-by-component basis) and reported vs. converted change  
23 scores on treatment effects. We will perform a sensitivity analysis that restricts analyses to the  
24 treatments for which there are a combined total of at least 500 patients.  
25  
26  
27  
28  
29  
30  
31  
32  
33  
34  
35  
36  
37  
38  
39  
40  
41

#### 42 *Assessing quality of the evidence*

43 We will use the GRADE (Grading of Recommendations, Assessment, Development, and  
44 Evaluation) approach to assess the quality of evidence on an outcome-by-outcome basis. The  
45 starting point for quality of evidence for randomized trials is high, but may be rated down based  
46 on limitations in risk of bias, imprecision, inconsistency, and indirectness and publication bias.<sup>31</sup>  
47  
48  
49  
50  
51  
52  
53  
54  
55  
56  
57  
58  
59  
60



1  
2  
3 We will also use the GRADE approach to assess quality of evidence for indirect and  
4 network (mixed) effect estimates.<sup>32, 33</sup> Indirect effect estimates are calculated from available  
5 'loops' of evidence, which includes first order loops (based on a single common comparator  
6 treatment, the difference between the treatment A and B is based on comparisons of A and C as  
7 well as B and C) or higher order loops (more than one intervening treatment connecting the two  
8 interventions). We will visually examine the network map and where first order loops are  
9 available for indirect comparisons, the quality of evidence will be the lower of the ratings for the  
10 two direct estimates contributing to the first order loop. In the absence of a first order loop, a  
11 higher order loop will be used to rate the quality of evidence and it will be the lower of the  
12 quality ratings for the direct estimates contributing to the loop. Further, we may rate down  
13 quality further for intransitivity.<sup>33</sup> The transitivity assumption implies similarity of trials in terms  
14 of population, intervention, settings, and trial methodology.<sup>34</sup>  
15  
16  
17  
18  
19  
20  
21  
22  
23  
24  
25  
26  
27  
28  
29  
30  
31  
32  
33  
34  
35  
36  
37  
38  
39  
40  
41  
42  
43  
44  
45  
46  
47  
48  
49  
50  
51  
52  
53  
54  
55  
56  
57  
58  
59  
60

### **Ethics and Dissemination**

No research ethics approval is required for this systematic review, as no confidential patient data will be used. The results of this systematic review will be disseminated through publication in a peer-reviewed journal and through conference presentations. Moreover, findings from our review will inform a clinical practice guideline. All amendments to the protocol will be reported in the PROSPERO trial registry.

For peer review only

## Discussion

With the high prevalence of acute non-low back MSK pain, the associated high socioeconomic burden and the paucity of evidence on the comparative effectiveness of treatment options, there is an urgent need for a high-quality systematic review to inform evidence-based management of these complaints.

Our proposed review has several strengths in relation to existing reviews. First, we will include all nonpharmacological and pharmacological treatment options for all acute MSK complaints (excluding low back pain). It is plausible that individual acute MSK complaints respond similarly to similar interventions, and thus by pooling across individual injuries, it may be possible to provide a more precise estimate of treatment effect. Second, we will update the search to present date. Third, we will use the GRADE approach to evaluate the quality of evidence supporting treatment effects. Fourth, we will ensure interpretability by presenting RDs and measures of relative effect for all outcomes reported, and by presenting our findings with GRADE evidence profiles.

A potential limitation will be the nature of available treatment comparisons to build robust networks for our analyses. The findings of our review will help inform patients with acute non-low back related MSK pain about their therapeutic options, identify key areas for research, and facilitate a clinical practice guideline for the management of acute, non-low back related MSK pain.

1  
2  
3 **Acknowledgements:** We thanks the members of our Technical Expert Panel for assistance in  
4 developing our study protocol: Robert McLean, MD; Devan Kansagara, MD; Dave O'Gurek,  
5 MD; Kenny Lin, MD; Christina Mikosz, MD; John Riva, DC, MSc; Moin Khan, MD.  
6  
7  
8  
9  
10

11 **Author Contributions:** All authors made substantial contributions to conception and design.  
12  
13  
14 JWB and BS drafted the article, and SC, RC, PJH, YO, CM, AL and GHG revised it critically for  
15 important intellectual content. All authors provided final approval of the version to be published.  
16  
17  
18 JWB is the guarantor of the review protocol.  
19  
20  
21  
22  
23

24 **Data sharing:** Statistical code and dataset available from Dr. Sadeghirad (e-mail:  
25  
26 b.sadeghirad@gmail.com).  
27  
28  
29  
30

31 **Funding:** This study is a sponsor-initiated review, supported by a grant from the National Safety  
32 Council (NSC) (PI: JW Busse). The NSC partnered with the American Academy of Family  
33 Physicians (AAFP) and the American College of Physicians (ACP) who helped to inform the  
34 design of our review, but the NSC will have no role in the conduct of the study; collection,  
35 management, analysis, and interpretation of the data; preparation, review, or approval of the  
36 resulting manuscript; or decision to submit the manuscript for publication. Representatives from  
37  
38  
39  
40  
41  
42  
43  
44  
45  
46  
47  
48  
49  
50  
51  
52  
53  
54  
55  
56  
57  
58  
59  
60  
AAFP and ACP will have the right to review the manuscript and make non-binding comments  
and suggestions.

51 **Competing interests:** None declared.  
52  
53  
54  
55  
56  
57  
58  
59  
60

1  
2  
3 **Patient consent:** Not required.  
4  
5  
6  
7

8 **Provenance and peer review:** This review was commissioned and externally peer reviewed.  
9  
10

11  
12 **Open Access:** This is an Open Access article distributed in accordance with the terms of the  
13 Creative Commons Attribution (CC BY 4.0) license, which permits others to distribute, remix,  
14 adapt and build upon this work, for commercial use, provided the original work is properly cited.  
15  
16  
17  
18

19 See: <http://creativecommons.org/licenses/by/4.0/>  
20  
21  
22  
23  
24  
25  
26  
27  
28  
29  
30  
31  
32  
33  
34  
35  
36  
37  
38  
39  
40  
41  
42  
43  
44  
45  
46  
47  
48  
49  
50  
51  
52  
53  
54  
55  
56  
57  
58  
59  
60

## References

1. United States Bone and Joint Initiative: The Burden of Musculoskeletal Diseases in the United States (BMUS) Rosemont, IL. 2014 [Third Edition [Available from: <http://www.boneandjointburden.org> accessed March 3rd 2017.
2. Agency for Healthcare Research and Quality (AHRQ), Center for Delivery O, and Markets, Healthcare Cost and Utilization Project (HCUP),. National Inpatient Sample (NIS) and Nationwide Emergency Department Sample (NEDS), 2013.
3. Todd KH, Miner JR. Pain in the emergency room. In: Fishman SM, Ballantyne JC, Rathmell JP, eds. *Bonica's Management of Pain*. Philadelphia, PA, USA: Lippincott, Williams and Wilkins 2010:1576–87.
4. Todd KH, Ducharme J, Choiniere M, et al. Pain in the emergency department: results of the pain and emergency medicine initiative (PEMI) multicenter study. *The journal of pain : official journal of the American Pain Society* 2007;8(6):460-6. doi: 10.1016/j.jpain.2006.12.005 [published Online First: 2007/02/20]
5. Vadivelu N, Mitra S, Hines R, et al. Acute pain in undergraduate medical education: an unfinished chapter! *Pain practice : the official journal of World Institute of Pain* 2012;12(8):663-71. doi: 10.1111/j.1533-2500.2012.00580.x [published Online First: 2012/06/21]
6. Fishman SM, Young HM, Lucas Arwood E, et al. Core competencies for pain management: results of an interprofessional consensus summit. *Pain medicine (Malden, Mass)* 2013;14(7):971-81. doi: 10.1111/pme.12107 [published Online First: 2013/04/13]
7. Watt-Watson J, Murinson BB. Current challenges in pain education. *Pain management* 2013;3(5):351-7. doi: 10.2217/pmt.13.39 [published Online First: 2014/03/25]

- 1  
2  
3 8. Côté P, Shearer H, Ameis A, et al. Enabling recovery from common traffic injuries: A focus  
4  
5 on the injured person. January 31, 2015; UOIT-CMCC Centre for the Study of Disability  
6  
7 Prevention and Rehabilitation.  
8  
9
- 10 9. Moher D, Shamseer L, Clarke M, et al. Preferred reporting items for systematic review and  
11  
12 meta-analysis protocols (PRISMA-P) 2015 statement. *Systematic reviews* 2015;4:1. doi:  
13  
14 10.1186/2046-4053-4-1 [published Online First: 2015/01/03]  
15  
16
- 17 10. Chou R, Deyo R, Friedly J, et al. Nonpharmacologic Therapies for Low Back Pain: A  
18  
19 Systematic Review for an American College of Physicians Clinical Practice Guideline. *Ann*  
20  
21 *Intern Med* 2017;166(7):493-505. doi: 10.7326/m16-2459 [published Online First:  
22  
23 2017/02/14]  
24  
25
- 26 11. Chou R, Deyo R, Friedly J, et al. Systemic Pharmacologic Therapies for Low Back Pain: A  
27  
28 Systematic Review for an American College of Physicians Clinical Practice Guideline. *Ann*  
29  
30 *Intern Med* 2017;166(7):480-92. doi: 10.7326/m16-2458 [published Online First:  
31  
32 2017/02/14]  
33  
34
- 35 12. Landis JR, Koch GG. The measurement of observer agreement for categorical data.  
36  
37 *Biometrics* 1977;33(1):159-74. [published Online First: 1977/03/01]  
38  
39
- 40 13. Tendal B, Nuesch E, Higgins JP, et al. Multiplicity of data in trial reports and the reliability  
41  
42 of meta-analyses: empirical study. *Bmj* 2011;343:d4829. doi: 10.1136/bmj.d4829 [published  
43  
44 Online First: 2011/09/01]  
45  
46
- 47 14. Higgins JPT, Altman DG, Gøtzsche PC, et al. The Cochrane Collaboration's tool for  
48  
49 assessing risk of bias in randomised trials. *BMJ* 2011;343:d5928. doi:  
50  
51 <http://dx.doi.org/10.1136/bmj.d5928>  
52  
53  
54  
55  
56  
57

15. Akl EA, Sun X, Busse JW, et al. Specific instructions for estimating unclearly reported blinding status in randomized trials were reliable and valid. *J Clin Epidemiol* 2012;65(3):262-67. doi: <http://dx.doi.org/10.1016/j.jclinepi.2011.04.015>
16. Higgins JP, Green S. Cochrane Handbook for Systematic Reviews of Interventions, version [5.1.0] (updated March 2011). The Cochrane Collaboration, 2011.
17. Thorlund K, Walter SD, Johnston BC, et al. Pooling health-related quality of life outcomes in meta-analysis-a tutorial and review of methods for enhancing interpretability. *Res Synth Methods* 2011;2(3):188-203. doi: 10.1002/jrsm.46 [published Online First: 2011/09/01]
18. DerSimonian R, Laird N. Meta-analysis in clinical trials. *Controlled clinical trials* 1986;7(3):177-88.
19. Busse JW, Bartlett SJ, Dougados M, et al. Optimal Strategies for Reporting Pain in Clinical Trials and Systematic Reviews: Recommendations from an OMERACT 12 Workshop. *The Journal of rheumatology* 2015;42(10):1962-70. doi: 10.3899/jrheum.141440 [published Online First: 2015/05/17]
20. Schunemann HJ, Guyatt GH. Commentary--goodbye M(C)ID! Hello MID, where do you come from? *Health services research* 2005;40(2):593-7. doi: 10.1111/j.1475-6773.2005.00374.x [published Online First: 2005/03/15]
21. Busse JW, Wang L, Kamaleldin M, et al. Opioids for Chronic Noncancer Pain: A Systematic Review and Meta-analysis. [Submitted] 2018(Accepted for publication)
22. White IR. Network meta-analysis. *The Stata Journal* 2015;15(4):951-85.
23. White IR, Barrett JK, Jackson D, et al. Consistency and inconsistency in network meta-analysis: model estimation using multivariate meta-regression. *Res Synth Methods* 2012;3(2):111-25. doi: 10.1002/jrsm.1045 [published Online First: 2012/06/01]



- 1  
2  
3 24. Donegan S, Williamson P, D'Alessandro U, et al. Assessing key assumptions of network  
4 meta-analysis: a review of methods. *Res Synth Methods* 2013;4(4):291-323. doi:  
5  
6 10.1002/jrsm.1085  
7  
8  
9  
10 25. Higgins JPT, Thompson SG, Deeks JJ, et al. Measuring inconsistency in meta-analyses. *BMJ*  
11  
12 2003;327(7414):557-60. doi: <http://dx.doi.org/10.1136/bmj.327.7414.557>  
13  
14  
15 26. Lu G, Ades AE. Assessing evidence inconsistency in mixed treatment comparisons. *J Am*  
16  
17 *Stat Assoc* 2006;101(474):447-59. doi: 10.1198/016214505000001302  
18  
19 27. Higgins JP, Jackson D, Barrett JK, et al. Consistency and inconsistency in network meta-  
20  
21 analysis: concepts and models for multi-arm studies. *Res Synth Methods* 2012;3(2):98-110.  
22  
23 doi: 10.1002/jrsm.1044 [published Online First: 2012/06/01]  
24  
25  
26 28. Salanti G, Ades AE, Ioannidis JPA. Graphical methods and numerical summaries for  
27  
28 presenting results from multiple-treatment meta-analysis: an overview and tutorial. *J Clin*  
29  
30 *Epidemiol* 2011;64(2):163-71. doi: <http://dx.doi.org/10.1016/j.jclinepi.2010.03.016>  
31  
32  
33 29. Mbuagbaw L, Rochweg B, Jaeschke R, et al. Approaches to interpreting and choosing the  
34  
35 best treatments in network meta-analyses. *Systematic reviews* 2017;6(1):79. doi:  
36  
37 10.1186/s13643-017-0473-z [published Online First: 2017/04/14]  
38  
39  
40 30. Trinquart L, Attiche N, Bafeta A, et al. Uncertainty in Treatment Rankings: Reanalysis of  
41  
42 Network Meta-analyses of Randomized Trials. *Ann Intern Med* 2016;164(10):666-73. doi:  
43  
44 10.7326/m15-2521 [published Online First: 2016/04/19]  
45  
46  
47 31. Guyatt GH, Oxman AD, Vist GE, et al. GRADE: an emerging consensus on rating quality of  
48  
49 evidence and strength of recommendations. *BMJ* 2008;336(7650):924-26. doi:  
50  
51 10.1136/bmj.39489.470347.AD  
52  
53  
54  
55  
56  
57  
58  
59  
60

- 1  
2  
3 32. Puhan MA, Schünemann HJ, Murad MH, et al. A GRADE Working Group approach for  
4 rating the quality of treatment effect estimates from network meta-analysis. *BMJ*  
5  
6 2014;349:5630. doi: 10.1136/bmj.g5630  
7  
8  
9  
10 33. Brignardello-Petersen R, Bonner A, Alexander PE, et al. Advances in the GRADE approach  
11 to rate the certainty in estimates from a network meta-analysis. *Journal of clinical*  
12 *epidemiology* 2018;93:36-44. doi: 10.1016/j.jclinepi.2017.10.005 [published Online First:  
13 2017/10/21]  
14  
15  
16  
17  
18  
19 34. Salanti G, Higgins JP, Ades A, et al. Evaluation of networks of randomized trials. *Stat*  
20 *Methods Med Res* 2008;17(3):279-301.  
21  
22  
23  
24  
25  
26  
27  
28  
29  
30  
31  
32  
33  
34  
35  
36  
37  
38  
39  
40  
41  
42  
43  
44  
45  
46  
47  
48  
49  
50  
51  
52  
53  
54  
55  
56  
57  
58  
59  
60

## Appendix: Literature Search Strategies

Summary of search and strategies ACP Acute MSK Pain

Feb 14, 2018

Database: OVID Medline Epub Ahead of Print, In-Process & Other Non-Indexed Citations, Ovid MEDLINE(R) Daily and Ovid MEDLINE(R) 1946 to Present

Search Strategy:

-----

1 exp arm injuries/ or athletic injuries/ or exp joint dislocations/ or exp fractures, bone/ or fractures, cartilage/ or exp hand injuries/ or exp hip injuries/ or exp leg injuries/ or exp neck injuries/ or occupational injuries/ or exp shoulder injuries/ or exp soft tissue injuries/ or exp "sprains and strains"/ or exp tendon injuries/ or exp Compartment Syndromes/ or exp Bone Malalignment/ (300813)

2 (exp Musculoskeletal system/ or musculoskeletal diseases/ or osteitis/ or exp cartilage diseases/ or exp fasciitis/ or exp bursitis/ or exp metatarsalgia/ or exp synovitis/ or muscle cramp/ or myalgia/ or exp tendinopathy/) and pain\*.ti,ab. (87772)

3 Musculoskeletal Pain/ or Neck Pain/ or Acute Pain/ or exp Arthralgia/ (19422)

4 (Arthralgi\* or bursitis or capsulit\* or epicondylgia\* or epicondylit\* or fasciopath\* or fasciitis or fascitis or metatarsalgi\* or myalgi\* or myelitis or myopath\* or myositis\* or osteitis or osteochondritis or osteomyelitis or polymyositis\* or radiculopath\* or radiculit\* or synovit\* or tend?nopath\* or tendinit\* or tenosynovit\* or whiplash or WAD).tw. (111653)

5 ((ligament or tendon or supraspinatus or infraspinatus or subscapularis or teres minor or teres major or trapezius or deltoid or bicep\* or bicipital or coracobrachialis or deltoid or fibularis or talofibular or calcaneofibular or calcaneotibial or tibio\* or rotator cuff) adj3 (injur\* or impair\* or imping\* or sprain\* or strain\* or tear or torn)).tw. (14400)

6 ((myofascial or neck\* or cervical\* or musculoskeletal\* or MSK or elbow\* or arm\* or finger\* or hand\* or wrist\* or forearm\* or leg or ankle\* or knee\* or hip\* or foot\* or toe\* or femur\* or radius or radii or tibia\* or ulna\* or humerus or humeri or metatarsal\* or metacarpal\* or fibula\* or patella\* or patellofemoral or carpal\* or tarsal\* or phalange\* or clavicle\* or scapula\* or bone\* or joint\* or muscle\* or shoulder\*) adj3 (sprain\* or strain\* or injur\* or impair\* or fractur\* or break\* or broken or disorder\* or pain\*)).tw. (235481)

7 or/1-6 (587971)

8 randomized controlled trial.pt. or randomi?ed.mp. or placebo.mp. (810530)

9 ((treatment or control) adj3 group\*).ab. (511607)

10 (allocat\* adj5 group\*).ab. (20402)

11 ((clinical or control\*) adj3 trial).ti,ab,kw. (226548)

12 or/8-11 (1258485)

13 7 and 12 (46565)

14 exp animals/ not humans.sh. (4424690)

15 13 not 14 (42705)

16 adult.mp. or middle aged.sh. or age:.tw. (8090446)

17 15 and 16 (30798)

18 limit 15 to "all adult (19 plus years)" (28434)

19 17 or 18 (31999)

20 treatment outcome/ (824861)

21 Pain Measurement/ (75370)

- 1  
2  
3 22 "Recovery of Function"/ (42703)  
4 23 ((disability or function\* or recover\* or pain\* or analog\*) adj3 (measur\* or evaluat\* or  
5 scale or status or test\* or assess\* or rating\* or index or questionnaire)).mp. (586581)  
6 24 (VAS or "visual analog\*" or "numeric\* rating scale" or "point scale" or comfort\* or  
7 "Disabilities of the Arm Shoulder and Hand" or DASH or "Shoulder Pain and Disability Index"  
8 or SPDI or "mcgill pain" or BPI or "brief pain" or improvement).mp. (628803)  
9 25 Return to Work/ or Return to Sport/ or ((return or resump\*) adj3 (work or sport or play or  
10 activit\*)).mp. (16520)  
11 26 pain\*.jw,ti. (199639)  
12 27 pain\*.ab. /freq=2 (243208)  
13 28 or/20-27 (2035376)  
14 29 19 and 28 (20709)  
15 30 exp appendicitis/ or exp Back Pain/ or Labor Pain/ or exp Pain, Postoperative/ or exp  
16 Toothache/ or headache/ or exp Headache disorders/ or exp dentistry/ or exp Neoplasms/  
17 (3499077)  
18 31 (pain\* adj3 (chronic or dental or labo?r or back or low back or spine or spinal or lumbar or  
19 sciatic\* or cancer\*)).mp. (118740)  
20 32 (sciatica or backache or dorsalgia or lumbago or toothache or migraine or appendicitis or  
21 metastas\*).mp. (463484)  
22 33 or/30-32 (3631063)  
23 34 29 not 33 (13769)  
24 35 (clinic\* or practi\* or primary or physician\* or refer\* or visit\* or outpatient\* or consult\* or  
25 family or communit\* or ambulatory or centre\* or center\* or office or sport\*).ti,ab. (7012189)  
26 36 34 and 35 (9481)  
27 37 Osteoarthritis/ (33247)  
28 38 exp arthroplasty/ or exp arthroscopy/ or bone transplantation/ (101224)  
29 39 su.fs. (1807708)  
30 40 or/37-39 (1863671)  
31  
32  
33  
34  
35

36 Feb 14, 2018

37 Database: Embase <1974 to 2018 February 13>

38 Search Strategy:  
39  
40

41 1 limb injury/ or exp arm injury/ or exp leg injury/ or exp limb fracture/ or sport injury/ or exp  
42 joint injury/ or musculoskeletal injury/ or exp cartilage injury/ or exp "ligament and tendon  
43 injury"/ or medial tibial stress syndrome/ or muscle injury/ or overexertion/ or exp sprain/ or  
44 fracture/ or avulsion fracture/ or clavicle fracture/ or comminuted fracture/ or fracture  
45 dislocation/ or exp fracture healing/ or intraarticular fracture/ or exp joint fracture/ or exp limb  
46 fracture/ or exp multiple fracture/ or exp scapula fracture/ or stress fracture/ or neck injury/ or  
47 whiplash injury/ or occupational accident/ or soft tissue injury/ or compartment syndrome/  
48 (382802)  
49

50 Annotation: includes arm injury/ or exp arm fracture/ or elbow dislocation/ or elbow injury/ or  
51 exp forearm injury/ or exp hand injury/ or exp shoulder injury/ or exp wrist injury/ or leg injury/  
52 or exp ankle injury/ or exp foot injury/ or exp hip injury/ or exp knee injury/ or exp leg fracture/  
53 or tibia torsion/ or exp ankle injury/ or exp dislocation/ or exp hip injury/ or intraarticular  
54  
55  
56  
57  
58  
59  
60

1  
2  
3 fracture/ or exp joint fracture/ or exp knee injury/ or posttraumatic arthropathy/ or exp wrist  
4 injury/

5 2 (exp musculoskeletal system/ or exp musculoskeletal disease/) and pain\*.ti,ab. (312623)

6 3 musculoskeletal pain/ or neck pain/ or shoulder pain/ or arthralgia/ (86878)

7 4 or/1-3 (692780)

8 Annotation: emtree terms condition MSK pain

9 5 (Arthralgi\* or bursitis or capsulit\* or epicondylgia\* or epicondylit\* or fasciopath\* or  
10 fasciitis or fascitis or metatarsalgi\* or myalgi\* or myelitis or myopath\* or myositis\* or osteitis or  
11 osteochondritis or osteomyelitis or polymyositis\* or radiculopath\* or radiculit\* or synovit\* or  
12 tend?nopath\* or tendinit\* or tenosynovit\* or whiplash or WAD).tw. (147804)

13 6 ((ligament or tendon or supraspinatus or infraspinatus or subscapularis or teres minor or  
14 teres major or trapezius or deltoid or bicep\* or bicipital or coracobrachialis or deltoid or fibularis  
15 or talofibular or calcaneofibular or calcaneotibial or tibio\* or rotator cuff) adj3 (injur\* or impair\*  
16 or imping\* or sprain\* or strain\* or tear or torn)).tw. (16617)

17 7 ((myofascial or neck\* or cervical\* or musculoskeletal\* or MSK or elbow\* or arm\* or  
18 finger\* or hand\* or wrist\* or forearm\* or leg or ankle\* or knee\* or hip\* or foot\* or toe\* or  
19 femur\* or radius or radii or tibia\* or ulna\* or humerus or humeri or metatarsal\* or metacarpal\*  
20 or fibula\* or patella\* or patellofemoral or carpal\* or tarsal\* or phalange\* or clavicle\* or  
21 scapula\* or bone\* or joint\* or muscle\* or shoulder\*) adj3 (sprain\* or strain\* or injur\* or impair\*  
22 or fractur\* or break\* or broken or disorder\* or pain\*).tw. (305948)

23 8 or/5-7 (444822)

24 Annotation: free text terms condition MSK pain

25 9 4 or 8 (897318)

26 Annotation: MSK pain

27 10 exp animals/ or exp invertebrate/ or animal experiment/ or animal model/ or animal tissue/  
28 or animal cell/ or nonhuman/ (25540585)

29 11 human/ or normal human/ or human cell/ (19287963)

30 12 10 and 11 (19240053)

31 13 10 not 12 (6300532)

32 14 9 not 13 (837728)

33 15 random:.tw. or placebo:.mp. or double-blind:.tw. (1509046)

34 Annotation: HIRU specific RCT filter

35 16 ((treatment or control) adj3 group\*).ab. (723604)

36 17 (allocat\* adj5 group\*).ab. (26448)

37 18 ((clinical or control\*) adj3 trial).ti,ab,kw. (327340)

38 19 or/15-18 (2107446)

39 Annotation: modified RCT filter

40 20 14 and 19 (95790)

41 Annotation: MSK pain with mod RCT filter

42 21 treatment outcome/ (762155)

43 22 outcome assessment/ (400641)

44 23 pain measurement/ (4687)

45 24 exp pain assessment/ (134012)

46 25 convalescence/ (42381)

47 26 return to sport/ or return to work/ (4870)

48 27 work resumption/ (3467)

1  
2  
3 28 ((disability or function\* or recover\* or pain\* or analog\*) adj3 (measur\* or evaluat\* or  
4 scale or status or test\* or assess\* or rating\* or index or questionnaire)).mp. (790797)  
5 29 (VAS or "visual analog\*" or "numeric\* rating scale" or "point scale" or comfort\* or  
6 "Disabilities of the Arm Shoulder and Hand" or DASH or "Shoulder Pain and Disability Index"  
7 or SPDI or "mcgill pain" or BPI or "brief pain" or improvement).mp. (911685)  
8 30 ((return or resump\*) adj3 (work or sport or play or activit\*)).mp. (23514)  
9 31 pain\*.jw,ti. (269095)  
10 32 pain\*.ab. /freq=2 (358966)  
11 33 or/21-32 (2816037)  
12 34 20 and 33 (58373)

13  
14  
15 Annotation: MSK pain with mod RCT and outcome

16 35 exp appendicitis/ or exp backache/ or labor pain/ or exp postoperative complication/ or exp  
17 tooth disease/ or headache/ or exp dentistry/ or exp malignant neoplasm/ or exp metastasis/  
18 (4067682)

19 36 (pain\* adj3 (chronic or dental or labo?r or back or low back or spine or spinal or lumbar or  
20 sciatic\* or cancer\*)).mp. (189693)

21 37 (sciatica or backache or dorsalgia or lumbago or toothache or migraine or metastas\* or  
22 appendicitis).mp. (778837)

23 38 35 or 36 or 37 (4238484)

24 39 34 not 38 (30664)

25  
26 Annotation: mod RCT set

27 40 (clinic\* or practi\* or primary or physician\* or refer\* or visit\* or outpatient\* or consult\* or  
28 family or communit\* or ambulatory or centre\* or center\* or office or sport\*).ti,ab. (9180696)

29  
30 Annotation: Gill 2014 primary care plus sport

31 41 39 and 40 (21784)

32 42 exp osteoarthritis/ (110006)

33 43 bone transplantation/ or exp bone graft/ (46349)

34 44 exp orthopedic surgery/ (406039)

35  
36 Annotation: includes exp joint surgery/ or exp arthroplasty/

37 45 su.fs. (1950489)

38 46 or/42-45 (2224706)

39  
40 Cochrane Library

41 Search Name: 2017-08-22 ACP acute msk pain search

42 Date Run: 14/02/18 20:52:03.682

43  
44 Description:

45  
46 ID Search Hits

47 #1 Arthralgi\* or bursitis or capsulit\* or epicondylgia\* or epicondyli\* or fasciopath\* or  
48 fasciitis or fascitis or metatarsalgi\* or myalgi\* or myelitis or myopath\* or myosit\* or osteitis or  
49 osteochondritis or osteomyelitis or polymyosit\* or radiculopath\* or radiculit\* or synovit\* or  
50 tend?nopath\* or tendinit\* or tenosynovit\* or whiplash or WAD 13121

51 #2 ((ligament or tendon or supraspinatus or infraspinatus or subscapularis or teres minor or  
52 teres major or trapezius or deltoid or bicep\* or bicipital or coracobrachialis or deltoid or fibularis  
53 or talofibular or calcaneofibular or calcaneotibial or tibio\* or rotator cuff) near/3 (injur\* or  
54 impair\* or imping\* or sprain\* or strain\* or tear or torn)) 2044

- 1  
2  
3 #3 ((myofascial or neck\* or cervical\* or musculoskeletal\* or MSK or elbow\* or arm\* or  
4 finger\* or hand\* or wrist\* or forearm\* or leg or ankle\* or knee\* or hip\* or foot\* or toe\* or  
5 femur\* or radius or radii or tibia\* or ulna\* or humerus or humeri or metatarsal\* or metacarpal\*  
6 or fibula\* or patella\* or patellofemoral or carpal\* or tarsal\* or phalange\* or clavicle\* or  
7 scapula\* or bone\* or joint\* or muscle\* or shoulder\*) near/3 (sprain\* or strain\* or injur\* or  
8 impair\* or fractur\* or break\* or broken or disorder\* or pain\*)) 38249  
9  
10 #4 #1 or #2 or #3 47667  
11 #5 ((disability or function\* or recover\* or pain\* or analog\*) near/3 (measur\* or evaluat\* or  
12 scale or status or test\* or assess\* or rating\* or index or questionnaire)) 109526  
13 #6 VAS or "visual analog\*" or "numeric\* rating scale" or "point scale" or comfort\* or  
14 "Disabilities of the Arm Shoulder and Hand" or DASH or "Shoulder Pain and Disability Index"  
15 or SPDI or "mcgill pain" or BPI or "brief pain" or improvement 139538  
16 #7 ((return or resump\*) near/3 (work or sport or play or activit\*)) 3128  
17 #8 pain\*:so 8908  
18 #9 pain\*:ti 34759  
19 #10 #5 or #6 or #7 or #8 or #9 214594  
20 #11 #4 and #10 24648  
21 #12 (pain\* near/3 (chronic or dental or labo?r or back or low back or spine or spinal or  
22 lumbar or sciatic\* or cancer\*)) 20816  
23 #13 sciatica or backache or dorsalgia or lumbago or toothache or migraine or appendicitis or  
24 metastas\* 27428  
25 #14 #12 or #13 45616  
26 #15 #11 not #14 18297  
27 #16 clinic\* or practi\* or primary or physician\* or refer\* or visit\* or outpatient\* or consult\* or  
28 family or communit\* or ambulatory or centre\* or center\* or office or sport\* 937038  
29 #17 #15 and #16 in Trials, with Wounds Group, Injuries Group, Pain, Palliative and  
30 Supportive Care Group, Musculoskeletal Group, Bone, Joint and Muscle Trauma Group, Back  
31 Group or Occupational Safety and Health Group in Review Groups  
32  
33  
34  
35  
36  
37  
38  
39  
40  
41

## CINAHL

|                                                                                                                                                                                                                                                                                                  |         |
|--------------------------------------------------------------------------------------------------------------------------------------------------------------------------------------------------------------------------------------------------------------------------------------------------|---------|
| S73 S66 NOT S72                                                                                                                                                                                                                                                                                  | 5,571   |
| S72 S67 OR S68 OR S69 OR S70 OR S71                                                                                                                                                                                                                                                              | 224,577 |
| S71 (MM "Surgery, Operative+")                                                                                                                                                                                                                                                                   | 211,375 |
| S70 (MH "Arthroscopy")                                                                                                                                                                                                                                                                           | 4,418   |
| S69 (MH "Arthroplasty")                                                                                                                                                                                                                                                                          | 1,646   |
| S68 (MH "Bone Transplantation")                                                                                                                                                                                                                                                                  | 3,342   |
| S67 (MH "Osteoarthritis+")                                                                                                                                                                                                                                                                       | 13,152  |
| S66 S64 AND S65                                                                                                                                                                                                                                                                                  | 8,761   |
| S65 TI ( clinic* or practi* or primary or physician* or refer* or visit* or outpatient* or<br>consult* or family or communit* or ambulatory or centre* or center* or office or sport* ) OR<br>AB ( clinic* or practi* or primary or physician* or refer* or visit* or outpatient* or consult* or |         |

|    |                                                                                                |         |
|----|------------------------------------------------------------------------------------------------|---------|
| 1  |                                                                                                |         |
| 2  |                                                                                                |         |
| 3  | family or communit* or ambulatory or centre* or center* or office or sport* )                  |         |
| 4  | 1,131,403                                                                                      |         |
| 5  | S64 S51 NOT S63                                                                                | 15,217  |
| 6  | S63 S60 OR S61 OR S62                                                                          | 359,216 |
| 7  | S62 TX sciatica or backache or dorsalgia or lumbago or toothache or migraine or appendicitis   |         |
| 8  | or metastas*                                                                                   | 35,825  |
| 9  | S61 TX (pain* N3 (chronic or dental or labo?r or back or low back or spine or spinal or lumbar |         |
| 10 | or sciatic* or cancer*))                                                                       | 49,583  |
| 11 | S60 S52 OR S53 OR S54 OR S55 OR S56 OR S57 OR S58 OR S59                                       | 329,798 |
| 12 | S59 (MH "Neoplasms+")                                                                          | 240,613 |
| 13 | S58 (MH "Dentistry+")                                                                          | 47,838  |
| 14 | S57 (MH "Headache+")                                                                           | 16,196  |
| 15 | S56 (MH "Toothache")                                                                           | 327     |
| 16 | S55 (MH "Postoperative Pain")                                                                  | 8,206   |
| 17 | S54 (MH "Labor Pain")                                                                          | 1,533   |
| 18 | S53 (MH "Back Pain+")                                                                          | 18,740  |
| 19 | S52 (MH "Appendicitis")                                                                        | 1,293   |
| 20 | S51 S17 AND S39 AND S48                                                                        | 20,097  |
| 21 | S50 S48 AND S49                                                                                | 20,097  |
| 22 | S49 S17 AND S39                                                                                | 33,880  |
| 23 | S48 S40 OR S41 OR S42 OR S43 OR S44 OR S45 OR S46 OR S47                                       | 457,089 |
| 24 | S47 SO pain*                                                                                   | 30,433  |
| 25 | S46 TI pain*                                                                                   | 68,365  |
| 26 | S45 TX ((disability or function* or recover* or pain* or analog*) N3 (measur* or evaluat* or   |         |
| 27 | scale or status or test* or assess* or rating* or index or questionnaire)).                    | 143,200 |
| 28 | S44 TX VAS or "visual analog*" or "numeric* rating scale" or "point scale" or comfort* or      |         |
| 29 | "Disabilities of the Arm Shoulder and Hand" or DASH or "Shoulder Pain and Disability Index"    |         |
| 30 | or SPDI or "mcgill pain" or BPI or "brief pain" or improvement                                 | 174,142 |
| 31 | S43 TX ((return or resump*) N3 (work or sport or play or activit*))                            | 6,311   |
| 32 | S42 (MH "Job Re-Entry") OR (MH "Sports Re-Entry") OR (MH "School Re-Entry")                    | 6,819   |
| 33 | S41 (MH "Pain Measurement")                                                                    | 27,842  |
| 34 | S40 (MH "Treatment Outcomes")                                                                  | 150,811 |
| 35 | S39 S37 NOT S38                                                                                | 563,918 |
| 36 | S38 (MH "Animals+")                                                                            | 37,258  |
| 37 | S37 S24 OR S29 OR S36                                                                          | 568,264 |
| 38 | S36 S30 OR S31 OR S32 OR S33 OR S34 OR S35                                                     | 495,048 |
| 39 | S35 (MH "Prospective Studies+")                                                                | 213,854 |
| 40 | S34 (MH "Evaluation Research+")                                                                | 41,488  |
| 41 | S33 (MH "Comparative Studies")                                                                 | 101,882 |
| 42 | S32 "latin square"                                                                             | 138     |
| 43 | S31 (MH "Study Design") OR (MH "Crossover Design") OR (MH "Experimental Studies+")             |         |
| 44 | 207,529                                                                                        |         |
| 45 | S30 (MH "Random Sample+")                                                                      | 67,305  |
| 46 | S29 S25 OR S26 OR S27 OR S28                                                                   | 211,728 |
| 47 | S28 "random*"                                                                                  | 203,059 |
| 48 | S27 "placebo*"                                                                                 | 33,694  |
| 49 |                                                                                                |         |
| 50 |                                                                                                |         |
| 51 |                                                                                                |         |
| 52 |                                                                                                |         |
| 53 |                                                                                                |         |
| 54 |                                                                                                |         |
| 55 |                                                                                                |         |
| 56 |                                                                                                |         |
| 57 |                                                                                                |         |
| 58 |                                                                                                |         |
| 59 |                                                                                                |         |
| 60 |                                                                                                |         |



1  
2  
3  
4  
5  
6  
7  
8  
9  
10  
11  
12  
13  
14  
15  
16  
17  
18  
19  
20  
21  
22  
23  
24  
25  
26  
27  
28  
29  
30  
31  
32  
33  
34  
35  
36  
37  
38  
39  
40  
41  
42  
43  
44  
45  
46  
47  
48  
49  
50  
51  
52  
53  
54  
55  
56  
57  
58  
59  
60

|                                                                                                                                                                                                                                                                                                                                                                                                                                                                                                                                             |         |
|---------------------------------------------------------------------------------------------------------------------------------------------------------------------------------------------------------------------------------------------------------------------------------------------------------------------------------------------------------------------------------------------------------------------------------------------------------------------------------------------------------------------------------------------|---------|
| S26 (MH "Placebos")                                                                                                                                                                                                                                                                                                                                                                                                                                                                                                                         | 8,296   |
| S25 (MH "Placebo Effect")                                                                                                                                                                                                                                                                                                                                                                                                                                                                                                                   | 1,210   |
| S24 S18 OR S19 OR S20 OR S21 OR S22 OR S23                                                                                                                                                                                                                                                                                                                                                                                                                                                                                                  | 195,829 |
| S23 "triple-blind"                                                                                                                                                                                                                                                                                                                                                                                                                                                                                                                          | 136     |
| S22 "single-blind"                                                                                                                                                                                                                                                                                                                                                                                                                                                                                                                          | 8,460   |
| S21 "double-blind"                                                                                                                                                                                                                                                                                                                                                                                                                                                                                                                          | 29,322  |
| S20 clinical W3 trial                                                                                                                                                                                                                                                                                                                                                                                                                                                                                                                       | 124,429 |
| S19 "randomi?ed controlled trial*"                                                                                                                                                                                                                                                                                                                                                                                                                                                                                                          | 69,029  |
| S18 (MH "Clinical Trials+")                                                                                                                                                                                                                                                                                                                                                                                                                                                                                                                 | 155,173 |
| S17 S5 OR S10 OR S15                                                                                                                                                                                                                                                                                                                                                                                                                                                                                                                        | 132,229 |
| S16 S11 OR S15                                                                                                                                                                                                                                                                                                                                                                                                                                                                                                                              | 132,229 |
| S15 S12 OR S13 OR S14                                                                                                                                                                                                                                                                                                                                                                                                                                                                                                                       | 98,300  |
| S14 TX ((myofascial or neck* or cervical* or musculoskeletal* or MSK or elbow* or arm* or finger* or hand* or wrist* or forearm* or leg or ankle* or knee* or hip* or foot* or toe* or femur* or radius or radii or tibia* or ulna* or humerus or humeri or metatarsal* or metacarpal* or fibula* or patella* or patellofemoral or carpal* or tarsal* or phalange* or clavicle* or scapula* or bone* or joint* or muscle* or shoulder*) N3 (sprain* or strain* or injur* or impair* or fractur* or break* or broken or disorder* or pain*)) | 78,680  |
| S13 TX ((ligament or tendon or supraspinatus or infraspinatus or subscapularis or teres minor or teres major or trapezius or deltoid or bicep* or bicipital or coracobrachialis or deltoid or fibularis or talofibular or calcaneofibular or calcaneotibial or tibio* or rotator cuff) N3 (injur* or impair* or imping* or sprain* or strain* or tear or torn))                                                                                                                                                                             | 10,622  |
| S12 TX Arthralgi* or bursitis or capsulit* or epicondylalgia* or epicondylit* or fasciopath* or fasciitis or fascitis or metatarsalgi* or myalgi* or myelitis or myopath* or myosit* or osteitis or osteochondritis or osteomyelitis or polymyosit* or radiculopath* or radiculit* or synovit* or tend?nopath* or tendinit* or tenosynovit* or whiplash or WAD                                                                                                                                                                              | 20,095  |
| S11 S5 OR S10                                                                                                                                                                                                                                                                                                                                                                                                                                                                                                                               | 91,140  |
| S10 S8 AND S9                                                                                                                                                                                                                                                                                                                                                                                                                                                                                                                               | Display |
| S9 TI pain* OR AB pain*                                                                                                                                                                                                                                                                                                                                                                                                                                                                                                                     | Display |
| S8 S6 OR S7                                                                                                                                                                                                                                                                                                                                                                                                                                                                                                                                 | Display |
| S7 (MH "Musculoskeletal Diseases") OR (MH "Cartilage Diseases+") OR (MH "Fasciitis+") OR (MH "Foot Diseases+") OR (MH "Golf Elbow") OR (MH "Heel Pain") OR (MH "Joint Diseases") OR (MH "Muscular Diseases") OR (MH "Arthralgia+") OR (MH "Bursitis+") OR (MH "Contracture+") OR (MH "Metatarsalgia") OR (MH "Shoulder Instability, Anterior") OR (MH "Shoulder Instability, Multidirectional") OR (MH "Shoulder Instability, Posterior") OR (MH "Synovitis")                                                                               | Display |
| S6 (MH "Musculoskeletal System") OR (MH "Cartilage+") OR (MH "Fascia+") OR (MH "Ligaments+") OR (MH "Muscles+") OR (MH "Bone and Bones") OR (MH "Arm Bones+") OR (MH "Foot Bones+") OR (MH "Leg Bones+") OR (MH "Pelvic Bones+") OR (MH "Joints+")                                                                                                                                                                                                                                                                                          | Display |
| S5 S1 OR S2 OR S3 OR S4                                                                                                                                                                                                                                                                                                                                                                                                                                                                                                                     | Display |
| S4 (MH "Neck Pain")                                                                                                                                                                                                                                                                                                                                                                                                                                                                                                                         | Display |
| S3 (MH "Arthralgia+")                                                                                                                                                                                                                                                                                                                                                                                                                                                                                                                       | Display |
| S2 (MH "Compartment Syndromes") OR (MH "Anterior Compartment Syndrome") OR (MH "Ischemic Contracture")                                                                                                                                                                                                                                                                                                                                                                                                                                      | Display |

1  
2  
3 S1 (MH "Arm Injuries+") OR (MH "Athletic Injuries+") OR (MH "Dislocations+") OR (MH  
4 "Fractures+") OR (MH "Hand Injuries+") OR (MH "Leg Injuries+") OR (MH "Ligament  
5 Injuries+") OR (MH "Neck Injuries+") OR (MH "Occupational-Related Injuries") OR (MH  
6 "Soft Tissue Injuries+") OR (MH "Sprains and Strains+") OR (MH "Tendon Injuries+")  
7  
8 Display  
9

10  
11 PEDro, yields 645  
12

13 March 13, 2018  
14

15  
16 Abstract & Title: acute  
17 AND  
18 Problem: pain  
19 AND  
20 Method: Clinical trial  
21  
22  
23  
24  
25  
26  
27  
28  
29  
30  
31  
32  
33  
34  
35  
36  
37  
38  
39  
40  
41  
42  
43  
44  
45  
46  
47  
48  
49  
50  
51  
52  
53  
54  
55  
56  
57  
58  
59  
60

# Reporting checklist for protocol of a systematic review.

Based on the PRISMA-P guidelines.

## Instructions to authors

Complete this checklist by entering the page numbers from your manuscript where readers will find each of the items listed below.

Your article may not currently address all the items on the checklist. Please modify your text to include the missing information. If you are certain that an item does not apply, please write "n/a" and provide a short explanation.

Upload your completed checklist as an extra file when you submit to a journal.

In your methods section, say that you used the PRISMA-P reporting guidelines, and cite them as:

Moher D, Shamseer L, Clarke M, Ghersi D, Liberati A, Petticrew M, Shekelle P, Stewart LA. Preferred Reporting Items for Systematic Review and Meta-Analysis Protocols (PRISMA-P) 2015 statement. *Syst Rev.* 2015;4(1):1.

|                |     | Reporting Item                                                                                                                                                              | Page Number |
|----------------|-----|-----------------------------------------------------------------------------------------------------------------------------------------------------------------------------|-------------|
| Identification | #1a | Identify the report as a protocol of a systematic review                                                                                                                    | 1           |
| Update         | #1b | If the protocol is for an update of a previous systematic review, identify as such                                                                                          | N/A         |
|                | #2  | If registered, provide the name of the registry (such as PROSPERO) and registration number                                                                                  | 4 & 8       |
| Contact        | #3a | Provide name, institutional affiliation, e-mail address of all protocol authors; provide physical mailing address of corresponding author                                   | 1           |
| Contribution   | #3b | Describe contributions of protocol authors and identify the guarantor of the review                                                                                         | 18          |
|                | #4  | If the protocol represents an amendment of a previously completed or published protocol, identify as such and list changes; otherwise, state plan for documenting important | 16          |

|    |                      |                                                                       |        |
|----|----------------------|-----------------------------------------------------------------------|--------|
|    |                      | protocol amendments                                                   |        |
| 1  |                      |                                                                       |        |
| 2  | Sources              | #5a Indicate sources of financial or other support for the review     | 18     |
| 3  |                      |                                                                       |        |
| 4  | Sponsor              | #5b Provide name for the review funder and / or sponsor               | 18     |
| 5  |                      |                                                                       |        |
| 6  |                      |                                                                       |        |
| 7  | Role of sponsor or   | #5c Describe roles of funder(s), sponsor(s), and / or institution(s), | 18     |
| 8  | funder               | if any, in developing the protocol                                    |        |
| 9  |                      |                                                                       |        |
| 10 |                      |                                                                       |        |
| 11 | Rationale            | #6 Describe the rationale for the review in the context of what is    | 6      |
| 12 |                      | already known                                                         |        |
| 13 |                      |                                                                       |        |
| 14 |                      |                                                                       |        |
| 15 | Objectives           | #7 Provide an explicit statement of the question(s) the review will   | 7      |
| 16 |                      | address with reference to participants, interventions,                |        |
| 17 |                      | comparators, and outcomes (PICO)                                      |        |
| 18 |                      |                                                                       |        |
| 19 |                      |                                                                       |        |
| 20 | Eligibility criteria | #8 Specify the study characteristics (such as PICO, study design,     | 8 & 9  |
| 21 |                      | setting, time frame) and report characteristics (such as years        |        |
| 22 |                      | considered, language, publication status) to be used as               |        |
| 23 |                      | criteria for eligibility for the review                               |        |
| 24 |                      |                                                                       |        |
| 25 |                      |                                                                       |        |
| 26 |                      |                                                                       |        |
| 27 | Information          | #9 Describe all intended information sources (such as electronic      | 8      |
| 28 | sources              | databases, contact with study authors, trial registers or other       |        |
| 29 |                      | grey literature sources) with planned dates of coverage               |        |
| 30 |                      |                                                                       |        |
| 31 |                      |                                                                       |        |
| 32 | Search strategy      | #10 Present draft of search strategy to be used for at least one      | 25-32  |
| 33 |                      | electronic database, including planned limits, such that it           |        |
| 34 |                      | could be repeated                                                     |        |
| 35 |                      |                                                                       |        |
| 36 |                      |                                                                       |        |
| 37 | Study records -      | #11a Describe the mechanism(s) that will be used to manage            | 9      |
| 38 | data management      | records and data throughout the review                                |        |
| 39 |                      |                                                                       |        |
| 40 |                      |                                                                       |        |
| 41 | Study records -      | #11b State the process that will be used for selecting studies (such  | 9      |
| 42 | selection process    | as two independent reviewers) through each phase of the               |        |
| 43 |                      | review (that is, screening, eligibility and inclusion in meta-        |        |
| 44 |                      | analysis)                                                             |        |
| 45 |                      |                                                                       |        |
| 46 |                      |                                                                       |        |
| 47 |                      |                                                                       |        |
| 48 | Study records -      | #11c Describe planned method of extracting data from reports          | 9 & 10 |
| 49 | data collection      | (such as piloting forms, done independently, in duplicate), any       |        |
| 50 | process              | processes for obtaining and confirming data from investigators        |        |
| 51 |                      |                                                                       |        |
| 52 |                      |                                                                       |        |
| 53 | Data items           | #12 List and define all variables for which data will be sought       | 9 & 10 |
| 54 |                      | (such as PICO items, funding sources), any pre-planned data           |        |
| 55 |                      | assumptions and simplifications                                       |        |
| 56 |                      |                                                                       |        |
| 57 |                      |                                                                       |        |
| 58 |                      |                                                                       |        |
| 59 |                      |                                                                       |        |
| 60 |                      |                                                                       |        |

|    |                    |      |                                                                                 |         |
|----|--------------------|------|---------------------------------------------------------------------------------|---------|
| 1  | Outcomes and       | #13  | List and define all outcomes for which data will be sought,                     | 9 & 10  |
| 2  | prioritization     |      | including prioritization of main and additional outcomes, with                  |         |
| 3  |                    |      | rationale                                                                       |         |
| 4  |                    |      |                                                                                 |         |
| 5  |                    |      |                                                                                 |         |
| 6  | Risk of bias in    | #14  | Describe anticipated methods for assessing risk of bias of                      | 10      |
| 7  | individual studies |      | individual studies, including whether this will be done at the                  |         |
| 8  |                    |      | outcome or study level, or both; state how this information will                |         |
| 9  |                    |      | be used in data synthesis                                                       |         |
| 10 |                    |      |                                                                                 |         |
| 11 |                    |      |                                                                                 |         |
| 12 |                    |      |                                                                                 |         |
| 13 | Data synthesis     | #15a | Describe criteria under which study data will be quantitatively                 | 10 & 11 |
| 14 |                    |      | synthesised                                                                     |         |
| 15 |                    |      |                                                                                 |         |
| 16 |                    |      |                                                                                 |         |
| 17 |                    | #15b | If data are appropriate for quantitative synthesis, describe                    | 10-14   |
| 18 |                    |      | planned summary measures, methods of handling data and                          |         |
| 19 |                    |      | methods of combining data from studies, including any                           |         |
| 20 |                    |      | planned exploration of consistency (such as I <sup>2</sup> , Kendall's $\tau$ ) |         |
| 21 |                    |      |                                                                                 |         |
| 22 |                    |      |                                                                                 |         |
| 23 |                    |      |                                                                                 |         |
| 24 |                    | #15c | Describe any proposed additional analyses (such as                              | 14      |
| 25 |                    |      | sensitivity or subgroup analyses, meta-regression)                              |         |
| 26 |                    |      |                                                                                 |         |
| 27 |                    |      |                                                                                 |         |
| 28 |                    | #15d | If quantitative synthesis is not appropriate, describe the type                 | N/A     |
| 29 |                    |      | of summary planned                                                              |         |
| 30 |                    |      |                                                                                 |         |
| 31 | Meta-bias(es)      | #16  | Specify any planned assessment of meta-bias(es) (such as                        | 14      |
| 32 |                    |      | publication bias across studies, selective reporting within                     |         |
| 33 |                    |      | studies)                                                                        |         |
| 34 |                    |      |                                                                                 |         |
| 35 |                    |      |                                                                                 |         |
| 36 |                    |      |                                                                                 |         |
| 37 | Confidence in      | #17  | Describe how the strength of the body of evidence will be                       | 14 & 15 |
| 38 | cumulative         |      | assessed (such as GRADE)                                                        |         |
| 39 | evidence           |      |                                                                                 |         |
| 40 |                    |      |                                                                                 |         |
| 41 |                    |      |                                                                                 |         |

The PRISMA-P checklist is distributed under the terms of the Creative Commons Attribution License CC-BY 4.0. This checklist was completed on 25. May 2018 using <http://www.goodreports.org/>, a tool made by the [EQUATOR Network](#) in collaboration with [Penelope.ai](#)

# BMJ Open

## Management of acute musculoskeletal pain (excluding low back pain): a protocol for a systematic review and network meta-analysis of randomised trials

|                                 |                                                                                                                                                                                                                                                                                                                                                                                                                                                                                                                                                                                                                                           |
|---------------------------------|-------------------------------------------------------------------------------------------------------------------------------------------------------------------------------------------------------------------------------------------------------------------------------------------------------------------------------------------------------------------------------------------------------------------------------------------------------------------------------------------------------------------------------------------------------------------------------------------------------------------------------------------|
| Journal:                        | <i>BMJ Open</i>                                                                                                                                                                                                                                                                                                                                                                                                                                                                                                                                                                                                                           |
| Manuscript ID                   | bmjopen-2018-024441.R1                                                                                                                                                                                                                                                                                                                                                                                                                                                                                                                                                                                                                    |
| Article Type:                   | Protocol                                                                                                                                                                                                                                                                                                                                                                                                                                                                                                                                                                                                                                  |
| Date Submitted by the Author:   | 30-Oct-2018                                                                                                                                                                                                                                                                                                                                                                                                                                                                                                                                                                                                                               |
| Complete List of Authors:       | Busse, Jason; McMaster University, Anesthesia; McMaster University, Clinical Epidemiology & Biostatistics<br>Craigie, Samantha; McMaster University<br>Sadeghirad, Behnam; McMaster University<br>Couban, Rachel; McMaster University, Michael G. DeGroote Institute for Pain Research and Care<br>Hong, Patrick; University of Ottawa Faculty of Medicine<br>Oparin, Yvgeniy; McMaster University Department of Medicine<br>May, Curtis; University of British Columbia Faculty of Medicine<br>Lok, Annie; McMaster University Department of Anaesthesia<br>Guyatt, Gordon; McMaster University, Clinical Epidemiology and Biostatistics |
| <b>Primary Subject Heading</b>: | General practice / Family practice                                                                                                                                                                                                                                                                                                                                                                                                                                                                                                                                                                                                        |
| Secondary Subject Heading:      | Evidence based practice                                                                                                                                                                                                                                                                                                                                                                                                                                                                                                                                                                                                                   |
| Keywords:                       | acute pain, musculoskeletal, intervention, systematic review, network metanalysis                                                                                                                                                                                                                                                                                                                                                                                                                                                                                                                                                         |
|                                 |                                                                                                                                                                                                                                                                                                                                                                                                                                                                                                                                                                                                                                           |

SCHOLARONE™  
Manuscripts

1  
2  
3 **Management of acute musculoskeletal pain (excluding low back pain): a protocol for a**  
4 **systematic review and network meta-analysis of randomised trials**  
5  
6  
7

8 Jason W. Busse, \*<sup>1,2,3,4</sup> [bussejw@mcmaster.ca](mailto:bussejw@mcmaster.ca)  
9  
10 Samantha Craigie, <sup>2</sup> [sraigie@mcmaster.ca](mailto:sraigie@mcmaster.ca)  
11  
12 Behnam Sadeghirad, <sup>2,3</sup> [sadeghb@mcmaster.ca](mailto:sadeghb@mcmaster.ca)  
13  
14 Rachel Couban, <sup>3</sup> [rcouban@mcmaster.ca](mailto:rcouban@mcmaster.ca)  
15  
16 Patrick J Hong, <sup>5</sup> [jhong030@uottawa.ca](mailto:jhong030@uottawa.ca)  
17  
18 Yvgeniy Oparin, <sup>6</sup> [opariny@mcmaster.ca](mailto:opariny@mcmaster.ca)  
19  
20 Curtis May, <sup>7</sup> [c\\_may@shaw.ca](mailto:c_may@shaw.ca)  
21  
22 Annie Lok, <sup>3</sup> [lokaym@mcmaster.ca](mailto:lokaym@mcmaster.ca)  
23  
24 Gordon H. Guyatt, <sup>2</sup> [guyatt@mcmaster.ca](mailto:guyatt@mcmaster.ca)  
25  
26

27 <sup>1</sup> Department of Anesthesia, McMaster University, Hamilton, Ontario, Canada

28  
29 <sup>2</sup> Department of Health Research Methods, Evidence, and Impact, McMaster University,  
30 Hamilton, Ontario, Canada

31  
32 <sup>3</sup> Michael G. DeGrootte Institute for Pain Research and Care, McMaster University, Hamilton,  
33 Ontario, Canada

34  
35 <sup>4</sup> The Michael G. DeGrootte Centre for Medicinal Cannabis Research, McMaster University,  
36 Hamilton, Ontario, Canada

37  
38 <sup>5</sup> University of Ottawa, Faculty of Medicine, Ottawa, Ontario, Canada

39  
40 <sup>6</sup> Michael G. DeGrootte School of Medicine, McMaster University, Hamilton, Ontario, Canada

41  
42 <sup>7</sup> School of Medicine, University of British Columbia, Vancouver, British Columbia, Canada  
43  
44  
45

46 **\*Corresponding Author:** Jason W. Busse, Department of Anesthesia, Michael G. DeGrootte  
47 School of Medicine, McMaster University, HSC-2V9, 1280 Main St.  
48 West, Hamilton, Canada, L8S 4K1

49  
50 Tel: [905-525-9140](tel:905-525-9140) (x21731)

51  
52 Fax: [905-523-1224](tel:905-523-1224)

53  
54 Email: [bussejw@mcmaster.ca](mailto:bussejw@mcmaster.ca)  
55  
56  
57

1  
2  
3 **Word count: 3,030**  
4  
5  
6  
7  
8  
9  
10  
11  
12  
13  
14  
15  
16  
17  
18  
19  
20  
21  
22  
23  
24  
25  
26  
27  
28  
29  
30  
31  
32  
33  
34  
35  
36  
37  
38  
39  
40  
41  
42  
43  
44  
45  
46  
47  
48  
49  
50  
51  
52  
53  
54  
55  
56  
57  
58  
59  
60

For peer review only



## Abstract

**Introduction:** Acute, non-low back related musculoskeletal pain is common and associated with significant socioeconomic costs. No review has evaluated all interventional studies for acute musculoskeletal pain, which limits attempts to make inferences regarding the relative effectiveness of treatments.

**Methods and analysis:** We will conduct a systematic review of all randomised controlled trials evaluating therapies for acute musculoskeletal pain (excluding low back pain). We will identify eligible, English-language, trials by a systematic search of CINAHL, EMBASE, MEDLINE, PEDro and the Cochrane Central Registry of Controlled Trials from inception to February 2018. Eligible trials will: (1) enrol patients presenting with acute, non-low back related musculoskeletal pain (duration of pain  $\leq 4$  weeks), and (2) randomise patients to alternative interventions or an intervention and a placebo/sham arm. Fractures will be considered ineligible, unless they are non-surgical and therapy is directed at pain relief. Pairs of reviewers will, independently and in duplicate, screen titles and abstracts of identified citations, review the full texts of potentially eligible trials and extract information from eligible trials. We will use a modified Cochrane instrument to evaluate risk of bias. Disagreements will be resolved through discussion to achieve consensus.

We will use the GRADE system to evaluate the quality of evidence supporting treatment effects. When possible, we will conduct: (1) in direct comparisons, a random-effects meta-analysis to establish the effectiveness of therapeutic interventions on patient-important outcomes; and (2) multiple treatment comparison meta-analysis to assess the relative effects of treatments. We will use a priori hypotheses to explain heterogeneity between studies. We will use STATA 14.2 for all analyses.

1  
2  
3 **Ethics and dissemination:** No research ethics approval is required for this systematic review.  
4

5 The results of this systematic review will be disseminated through publication in a peer-reviewed  
6 journal, conference presentations, and will inform a clinical practice guideline.  
7  
8  
9

10  
11  
12 **Key Words:** acute pain; musculoskeletal; intervention; systematic review; network meta-  
13 analysis  
14  
15

16  
17  
18  
19 **PROSPERO registration number:** CRD42018094412  
20  
21  
22  
23  
24  
25  
26  
27  
28  
29  
30  
31  
32  
33  
34  
35  
36  
37  
38  
39  
40  
41  
42  
43  
44  
45  
46  
47  
48  
49  
50  
51  
52  
53  
54  
55  
56  
57  
58  
59  
60

## Article Summary

### Strengths and limitations

- Our broad study eligibility criteria will increase generalizability of our results.
- We will use the Grading of Recommendations Assessment, Development and Evaluation (GRADE) approach to evaluate our confidence in treatment effects.
- We will optimize interpretability by presenting risk differences and measures of relative effect for all outcomes reported, and by presenting our findings with GRADE evidence profiles.
- Findings from our review will inform a clinical practice guideline and identify key areas for future research.
- Our results will be limited by possible shortcomings of the primary studies.

## Introduction

Acute non-low back related musculoskeletal (MSK) pain, which include strains and sprains, dislocations, and whiplash present for less than 1 month<sup>1</sup>, are associated with considerable morbidity in North America. The Burden of Musculoskeletal Diseases in the United States, 3<sup>rd</sup> edition, found that sprains and strains are the most frequent injury type for which medical care is sought and the majority of MSK injuries occur among working-age adults.<sup>2</sup> In 2013 there were 2,807,880 emergency department (ED) visits for sports-related injuries in the US,<sup>3</sup> and over 70% of visits to the ED are because of pain-related complaints.<sup>4</sup> Management often yields suboptimal outcomes: a survey of 842 acute pain patients at 20 US and Canadian hospitals found 40% reported their pain did not change or increased after visiting the ED, and 74% of patients were discharged in moderate to severe pain.<sup>5</sup>

Despite the prevalence of acute MSK complaints in primary care, a number of studies have highlighted inadequate pain education of among physicians.<sup>6-8</sup> The availability of numerous pharmacologic and non-pharmacologic therapies further complicates management decisions. Currently available treatments include opioids, nonsteroidal anti-inflammatory drugs, muscle relaxants, acetaminophen, exercise, supervised rehabilitation, joint manipulation and mobilization, massage, acupuncture and acupressure, ultrasound, low-level laser therapy, and transcutaneous electrical nerve stimulation.

A recently published series of 24 systematic reviews of treatment for common acute MSK injuries,<sup>9</sup> suffers from many important limitations, including: (1) selection bias due, in part, to exclusion of studies deemed to be at high risk of bias without empirically exploring if effect estimates differed from studies assigned low risk of bias, (2) interpreting results from individual studies as effective if the mean difference in a given outcome met the minimally

1  
2  
3 important difference (MID) and ineffective if not - an interpretation that relies on the unlikely  
4 assumption that all patients will experience the same degree of improvement, and fails to  
5 consider the distribution around the mean and the proportion of patients that achieve the MID,  
6  
7  
8 (3) no appraisal of the overall quality (confidence, certainty) of the evidence, and (4) no  
9  
10 statistical pooling of treatment effects. We propose to conduct a systematic review of  
11  
12 randomized trials to assess the comparative effectiveness of available non-surgical treatments for  
13  
14 acute MSK pain (excluding low back pain) and assess quality of evidence using the Grading of  
15  
16 Recommendations Assessment, Development and Evaluation (GRADE) methodology.  
17  
18  
19  
20  
21  
22  
23  
24  
25  
26  
27  
28  
29  
30  
31  
32  
33  
34  
35  
36  
37  
38  
39  
40  
41  
42  
43  
44  
45  
46  
47  
48  
49  
50  
51  
52  
53  
54  
55  
56  
57  
58  
59  
60

## Methods

### *Protocol registration*

The protocol for this systematic review is registered with PROSPERO (CRD42018094412). This review was commissioned by the American Academy of Family Physicians and American College of Physicians and sponsored by the National Safety Council.

### *Standardized Reporting*

We used the PRISMA-P checklist when writing our report.<sup>10</sup>

### *Information sources*

We will identify eligible, English language, randomized clinical trials (RCTs) through a systematic search of MEDLINE, EMBASE, CINAHL, PEDro and CENTRAL, from inception of each database through February 2018. Our search has been refined for individual databases by an experienced medical librarian (Appendix). We will scan reference lists of included studies and relevant systematic reviews for additional eligible articles.

### *Eligibility criteria and study selection*

We will include therapeutic trials that: 1) enroll adult patients ( $\geq 18$  years) presenting with acute, non-low back related MSK pain (pain with duration  $< 4$  weeks or defined by authors as “acute”) in an outpatient setting, and 2) randomise them to currently available, non-surgical, alternative interventions directed at pain relief (pharmacological or non-pharmacological) or a currently available, non-surgical, intervention directed at pain relief and a placebo/sham arm. Eligible MSK conditions include sprains and strains. Surgical fractures, non-surgical fractures unless

1  
2  
3 therapy is directed at pain relief, low back pain, neuropathic pain, acute cancer pain, acute  
4  
5 postoperative pain, acute dental pain, pain associated with labour and delivery, visceral pain,  
6  
7 pain due to infection, and headaches will be excluded. We will exclude interventions targeted at  
8  
9 treatment of acute low back pain on request by the study funder, as they have previously  
10  
11 commissioned evidence syntheses on this topic.<sup>11 12</sup>  
12  
13

14  
15 Ten teams of trained reviewers will work independently in pairs to screen titles and  
16  
17 abstracts of identified citations, using standardized, pilot-tested forms in DistillerSR, an online  
18  
19 systematic review software (Evidence Partners, Ottawa, Canada; <http://systematic-review.net/>).  
20  
21 The same teams of reviewers will screen full texts of any articles judged as potentially eligible.  
22  
23 Reviewers will discuss disagreements to come to consensus, referring to an adjudicator if  
24  
25 necessary. We will measure agreement between reviewers by calculating kappa ( $\kappa$ ) values to  
26  
27 assess the reliability of full-text review, and interpret them using the following thresholds: <0.20  
28  
29 as slight agreement, 0.21–0.40 as fair agreement, 0.41–0.60 as moderate agreement, 0.61–0.80 as  
30  
31 substantial agreement and >0.80 as almost perfect agreement.<sup>13</sup>  
32  
33  
34  
35  
36  
37

### 38 *Data abstraction*

39  
40 We designed standardized data abstraction forms and a detailed instruction video (accessible at:  
41  
42 <https://www.youtube.com/watch?v=1nwFJ61K3sQ>). We will conduct calibration exercises prior  
43  
44 to beginning data abstraction to ensure consistency and accuracy of extractions. Seven teams of  
45  
46 reviewers will extract data independently and in duplicate. We will extract the following data  
47  
48 from eligible trials into a standardized spreadsheet: study characteristics (e.g. the first author,  
49  
50 publication year, country of origin, and funding source), participant and trial characteristics (e.g.  
51  
52 sample size, mean age of participants, clinical condition, type and severity of injury, proportion  
53  
54  
55  
56  
57  
58  
59  
60

1  
2  
3 with known chronic pain/condition prior to acute injury, and the proportion receiving opioids at  
4 the time of enrollment), characteristics of interventions and comparators, patient-important  
5 outcomes (pain, function, health-related quality of life, patient satisfaction, return to work,  
6 proportion of patients with relief, re-injury and all reported adverse events). We will extract pain  
7 at any time-point, whereas for other outcomes, we will use the longest follow-up reported.<sup>14</sup>  
8  
9  
10  
11  
12  
13  
14  
15

### 16 *Risk of bias assessment*

17  
18 Among eligible studies, we will independently assess the following risk of bias issues: (1) random  
19 sequence generation, (2) allocation concealment, (3) blinding of study participants, personnel, and  
20 outcome assessors, (4) incomplete outcome data ( $\geq 20\%$  missing data will be considered at high  
21 risk of bias), and (5) other sources of bias.<sup>15</sup> To assess the risk of bias we will use a modified  
22 version of the Cochrane risk of bias instrument.<sup>16</sup> Our instrument will use the following responses:  
23 ‘definitely yes’ or ‘probably yes’ (considered as low risk of bias), or ‘definitely no’ or ‘probably  
24 no’ (considered as high risk of bias). These response options have published evidence of validity  
25 for assessing blinding.<sup>16</sup> Any discrepancy in assessment of risk of bias will be resolved by  
26 discussion, or third party adjudication if needed. We will contact authors for missing information  
27 regarding risk of bias issues and unpublished data (e.g. effect estimates without accompanying  
28 estimates of precision).  
29  
30  
31  
32  
33  
34  
35  
36  
37  
38  
39  
40  
41  
42  
43  
44  
45  
46

### 47 *Data synthesis*

48  
49 MSK complaints are increasingly being considered together as risk factors<sup>17</sup>, prognosis<sup>18</sup> and,  
50 because treatments are often similar, in guideline recommendations.<sup>19 20</sup> For the purposes of  
51 statistical pooling, we will explore treatment effects of interventions across all MSK complaints  
52  
53  
54  
55  
56  
57



1  
2  
3 eligible for this review; however, we will also explore if treatment effects differ by clinical  
4 condition or injury severity. Clustering strategies for clinical condition and injury severity will be  
5 informed by the trials eligible for our review, which will be reviewed by a technical expert panel,  
6 blinded to study results. Treatment effects will be pooled using the longest follow-up time  
7 reported, except for pain, which will be pooled at the most commonly reported short, medium and  
8 long-term follow-up times reported. For our review, these categories will be 30 to 120 minutes  
9 post-treatment (short), 1 to 7 days post-treatment (medium), and 3 to 12 weeks post-treatment  
10 (long). As such, a single trial could contribute to up to 3 time-points for our pooled results for pain  
11 relief. Alternately, trials that reported pain relief at time points outside of these timeframes would  
12 not contribute data for our analyses of pain relief.  
13  
14  
15  
16  
17  
18  
19  
20  
21  
22  
23  
24  
25  
26  
27

### 28 *Methods for direct comparisons*

29  
30 We will pool dichotomous outcomes that are reported by >1 RCT and calculate the relative risk  
31 and risk difference (RD), using baseline risk estimates from the placebo arm of eligible studies,  
32 and the associated 95% confidence intervals (CIs). We will pool all continuous outcomes that are  
33 reported by >1 study and calculate the weighted mean differences (WMDs) and associated 95%  
34 CIs. We will employ methods described in Cochrane Handbook to estimate the mean and standard  
35 deviation (SD) when median, range, and sample size are reported, and to impute the SD if the  
36 standard error or SD for the differences are not reported.<sup>21</sup> For continuous outcomes, when studies  
37 report effect estimates using different measurement instruments that tap into a common construct  
38 (e.g. pain), we will first transform all outcomes to a common instrument on a domain-by-domain  
39 basis.<sup>22</sup> We will use change scores from baseline to end of follow-up rather than end-of-study  
40 scores, in order to account for inter-patient variability. If authors do not report change scores, we  
41  
42  
43  
44  
45  
46  
47  
48  
49  
50  
51  
52  
53  
54  
55  
56  
57  
58  
59  
60

1  
2  
3 will calculate them using the baseline and end-of-study score and a correlation coefficient derived  
4 from the largest trial at lowest risk of bias in the meta-analysis that does report a change score. We  
5  
6 will use DerSimonian–Laird random-effects models<sup>23</sup> for all pairwise comparisons.  
7  
8  
9

10 Interpreting effect estimates for continuous outcomes is challenging,<sup>24</sup> and we will present  
11 the minimally important difference (MID) for all pooled effect estimates. The MID is the smallest  
12 amount of improvement in a treatment outcome that a patient would recognize as important.<sup>25</sup> If  
13  
14 we find multiple MID estimates are available, we will use the smallest difference that has been  
15  
16 validated.  
17  
18  
19  
20

21 However, simply presenting the MID risks interpreting all mean effects that fall below the  
22 MID as unimportant, whereas we have found that, typically, mean differences of 1/2 the MID  
23 result in RDs of about 10% - a potential benefit that many patients may consider important.<sup>26</sup> Thus,  
24  
25 concluding that an effect is unimportant requires confidence that the mean difference is less than  
26  
27 1/2 the MID (and perhaps less). To optimize interpretability, we will calculate the RD of achieving  
28  
29 the MID, as well as the associated 95% CIs, for all statistically significant WMDs. Specifically,  
30  
31 for each individual study, we will assume that the SDs of outcome measurements are the same in  
32  
33 both the treatment and control groups, and that change scores in both groups are normally  
34  
35 distributed. We will use the median or mean, and SD of the control group, with the established  
36  
37 MID for the outcome in question to estimate the probability of achieving  $\geq$  MID in the control  
38  
39 group. We will use the pooled mean difference (and 95% CI) to estimate the mean (and 95% CI)  
40  
41 in the treatment group and calculate the probability (and 95% CI) of achieving  $\geq$  MID in the  
42  
43 treatment group. Finally, we will use risks in both groups to acquire the RD for achieving  $\geq$  MID.  
44  
45  
46  
47  
48  
49  
50  
51  
52  
53

54 *Methods for network meta-analysis*  
55  
56  
57

1  
2  
3 We will perform network meta-analysis to synthesize the available evidence from the entire  
4 network of trials by integrating direct and indirect estimates for each comparison into a single  
5 summary treatment effect. We will use a frequentist random-effects model using the methodology  
6 of multivariable meta-analysis to assess the comparative effectiveness of eligible interventions.<sup>27</sup>  
7  
8  
9  
10  
11  
12 28

13  
14  
15 Although the assumptions for network meta-analysis are similar to conventional meta-  
16 analysis, key extra assumptions are transitivity (there are no effect modifiers influencing the  
17 indirect comparisons) and coherence (direct and indirect effect estimates being similar).<sup>29</sup> We will  
18 identify issues of incoherence by comparing direct evidence (i.e. estimates from pairwise  
19 comparisons) with indirect evidence (i.e. estimates from network meta-analysis) using the node  
20 splitting method.<sup>30 31</sup> In this approach, incoherence is assessed locally by evaluating the  
21 consistency assumption in each closed loop of the network separately as the difference between  
22 direct and indirect estimates for a specific comparison in the loop. We will assume a common  
23 heterogeneity estimate within each loop. We will also confirm the coherence assumption in the  
24 entire network using a ‘design-by-treatment’ model.<sup>32</sup> In case we find significant incoherence in  
25 the network (highly significant p value from design-by-treatment model), we will perform network  
26 meta-analysis using an inconsistency model. If using an inconsistency model results in non-  
27 sensical results, we will explore the network for the source(s) of incoherence and further expand  
28 (disintegrating interventions based on differences in population or intervention characteristics) or  
29 exclude the node(s) introducing incoherence into the network (e.g., excluding node(s) with less  
30 than 20 events for binary outcomes or comparisons with only one trial with very few participants  
31 for continuous outcomes).

1  
2  
3 We will report our findings with probability statements of intervention effects. Probability  
4 rankings allow us to report a chance percentage of which interventions rank higher,<sup>33</sup> however,  
5 simplifying the results of a network down to probabilities can lead to misinterpretations,  
6 specifically, when particular comparisons (i.e. nodes) are not well-connected or when the quality  
7 of evidence varies between comparisons.<sup>34 35</sup> Following display of the rank probabilities using  
8 rankogram, we will use the surface under the cumulative ranking (SUCRA) line to aid in  
9 interpretation of relative effect of the interventions. An intervention with a SUCRA value of 100  
10 is certain to be the most effective, whereas an intervention with 0 is certain to be the least  
11 effective.<sup>33</sup> We will use STATA (StataCorp, Release 14.2, College Station, Texas, USA) for all  
12 statistical analyses. All comparisons will be 2-tailed using a threshold  $p \leq 0.05$ .  
13  
14  
15  
16  
17  
18  
19  
20  
21  
22  
23  
24  
25  
26  
27

### 28 *Subgroup analyses, meta-regression and sensitivity analysis*

29  
30 We will use Cochran's Q statistic and  $I^2$  to determine statistical heterogeneity for direct meta-  
31 analysis.<sup>30</sup> We have developed five hypotheses to explain heterogeneity between trials: (1)  
32 different clinical conditions will show different treatment effects; (2) more severe injuries will  
33 show smaller treatment effects than less severe injuries (e.g. higher grades of strains and sprains  
34 vs. lower grades); (3) older patients will show smaller treatment effects than younger patients; (4)  
35 longer follow-up will show smaller treatment effects than shorter follow-up; and (5) higher  
36 dose/intensity of treatment will show larger treatment effects. We will perform subgroup analyses  
37 regardless of heterogeneity estimates. Moreover, we will explore the effect of risk of bias (on a  
38 component-by-component basis) and reported vs. converted change scores on treatment effects.  
39  
40  
41  
42  
43  
44  
45  
46  
47  
48  
49  
50  
51  
52  
53

### 54 *Assessing quality of the evidence*

1  
2  
3 We will use the GRADE approach to assess the quality of evidence on an outcome-by-outcome  
4 basis. The starting point for quality of evidence for RCTs is high, but may be rated down based on  
5 limitations in risk of bias, imprecision, inconsistency, and indirectness and publication bias.<sup>36</sup>  
6  
7 When there are at least 10 studies for meta-analysis<sup>37 38</sup>, we will assess publication bias by visual  
8 assessment of asymmetry of the funnel plot and calculated Begg's test.  
9  
10  
11  
12  
13

14 We will also use the GRADE approach to assess quality of evidence for indirect and  
15 network (mixed) effect estimates.<sup>39 40</sup> Indirect effect estimates are calculated from available  
16 'loops' of evidence, which includes first order loops (based on a single common comparator  
17 treatment, the difference between the treatment A and B is based on comparisons of A and C as  
18 well as B and C) or higher order loops (more than one intervening treatment connecting the two  
19 interventions). We will visually examine the network map and where first order loops are  
20 available for indirect comparisons, the quality of evidence will be the lower of the ratings for the  
21 two direct estimates contributing to the first order loop. In the absence of a first order loop, a  
22 higher order loop will be used to rate the quality of evidence. We may rate down quality of  
23 evidence further for intransitivity.<sup>40</sup> The transitivity assumption implies similarity of trials in  
24 terms of population, intervention, settings, and trial methodology.<sup>41</sup>  
25  
26  
27  
28  
29  
30  
31  
32  
33  
34  
35  
36  
37  
38  
39

40 It is very rare for a network meta-analysis to establish a single treatment option as clearly  
41 superior to all others. We will categorize interventions according to three categories: (1) those  
42 that are clearly superior, (2) those with intermediate effectiveness, and (3) those that are inferior.  
43  
44 Treatments no better than placebo will be in the lowest tier, those better than placebo in tier 1  
45 (likely intermediate); those superior to at least 1 tier 1 treatment will be judged superior.  
46  
47 Treatments will be further categorized according to quality of evidence supporting those  
48 estimates (high and moderate vs. low or very low). Interventions with moderate or high quality  
49  
50  
51  
52  
53  
54  
55  
56  
57  
58  
59  
60

1  
2  
3 evidence will be ranked as either ‘among the most effective’, ‘inferior to the most effective /  
4 superior to the least effective’, or ‘among the least effective’. Interventions supported by low or  
5 very low quality evidence will be ranked into the same 3 categories but prefaced with ‘may be’  
6 to acknowledge the reduced confidence in supporting evidence (e.g. ‘may be among the most  
7 effective’) and will be presented separately from those supported by moderate or high quality  
8 evidence.  
9  
10  
11  
12  
13  
14  
15  
16  
17  
18

### 19 **Ethics and Dissemination**

20  
21 No research ethics approval is required for this systematic review, as no confidential patient data  
22 will be used. The results of this systematic review will be disseminated through publication in a  
23 peer-reviewed journal and through conference presentations. Moreover, findings from our review  
24 will inform a clinical practice guideline. All amendments to the protocol will be reported in the  
25 PROSPERO trial registry.  
26  
27  
28  
29  
30  
31  
32  
33  
34

### 35 **Patient and Public Involvement**

36  
37 No patients were involved in setting the research question, in developing plans for design,  
38 interpretation, reporting or implementation of the study. We plan to disseminate the results of  
39 this study to organisations supporting patients with acute MSK pain.  
40  
41  
42  
43  
44  
45  
46  
47  
48  
49  
50  
51  
52  
53  
54  
55  
56  
57  
58  
59  
60

## Discussion

With the high prevalence of acute non-low back MSK pain, the associated socioeconomic burden and the paucity of evidence on the comparative effectiveness of treatment options, there is an urgent need for a high-quality systematic review to inform evidence-based management of these complaints.

Our proposed review has several strengths in relation to existing reviews. First, we will explore all currently available non-pharmacological and pharmacological treatment options for all acute MSK complaints (excluding low back pain) reported among eligible trials. It is plausible that individual acute MSK complaints respond similarly to similar interventions, and thus by pooling across individual injuries, it may be possible to provide a more precise estimate of treatment effect. Second, we will update the search to present date. Third, we will use the GRADE approach to evaluate the quality of evidence supporting treatment effects. Fourth, we will ensure interpretability by presenting RDs and measures of relative effect for all outcomes reported, and by presenting our findings with GRADE evidence profiles.

A potential limitation will be the nature of available treatment comparisons to build robust networks for our analyses. The findings of our review will help inform patients with acute non-low back related MSK pain about their therapeutic options, identify key areas for research, and facilitate a clinical practice guideline for the management of acute, non-low back related MSK pain.

1  
2  
3 **Acknowledgements:** We thanks the members of our Technical Expert Panel for assistance in  
4 developing our study protocol: Robert McLean, MD; Devan Kansagara, MD; Dave O'Gurek,  
5 MD; Kenny Lin, MD; Christina Mikosz, MD; John Riva, DC, MSc; Moin Khan, MD.  
6  
7  
8  
9  
10

11  
12 **Author Contributions:** All authors made substantial contributions to conception and design.  
13  
14 JWB and BS drafted the article, and SC, RC, PJH, YO, CM, AL and GHG revised it critically for  
15 important intellectual content. All authors provided final approval of the version to be published.  
16  
17 JWB is the guarantor of the review protocol.  
18  
19  
20  
21  
22  
23

24 **Data sharing:** Statistical code and dataset available from Dr. Sadeghirad (e-mail:  
25 b.sadeghirad@gmail.com).  
26  
27  
28  
29  
30

31 **Funding:** This study is a sponsor-initiated review, supported by a grant from the National Safety  
32 Council (NSC) (PI: JW Busse). The NSC partnered with the American Academy of Family  
33 Physicians (AAFP) and the American College of Physicians (ACP) who helped to inform the  
34 design of our review, but the NSC will have no role in the conduct of the study; collection,  
35 management, analysis, and interpretation of the data; preparation, review, or approval of the  
36 resulting manuscript; or decision to submit the manuscript for publication. Representatives from  
37 AAFP and ACP will have the right to review the manuscript and make non-binding comments  
38 and suggestions.  
39  
40  
41  
42  
43  
44  
45  
46  
47  
48  
49  
50

51 **Competing interests:** None declared.  
52  
53  
54  
55  
56  
57  
58  
59  
60



1  
2  
3 **Patient consent:** Not required.  
4  
5  
6  
7

8 **Provenance and peer review:** This review was commissioned and externally peer reviewed.  
9  
10

11  
12 **Open Access:** This is an Open Access article distributed in accordance with the terms of the  
13  
14 Creative Commons Attribution (CC BY 4.0) license, which permits others to distribute, remix,  
15  
16 adapt and build upon this work, for commercial use, provided the original work is properly cited.  
17  
18

19 See: <http://creativecommons.org/licenses/by/4.0/>  
20  
21  
22  
23  
24  
25  
26  
27  
28  
29  
30  
31  
32  
33  
34  
35  
36  
37  
38  
39  
40  
41  
42  
43  
44  
45  
46  
47  
48  
49  
50  
51  
52  
53  
54  
55  
56  
57  
58  
59  
60

## References

1. Olsen MF, Bjerre E, Hansen MD, et al. Pain relief that matters to patients: systematic review of empirical studies assessing the minimum clinically important difference in acute pain. *BMC medicine* 2017;15(1):35. doi: 10.1186/s12916-016-0775-3 [published Online First: 2017/02/22]
2. United States Bone and Joint Initiative: The Burden of Musculoskeletal Diseases in the United States (BMUS) Rosemont, IL. 2014 [Third Edition [Available from: <http://www.boneandjointburden.org> accessed March 3rd 2017.
3. Agency for Healthcare Research and Quality (AHRQ), Center for Delivery Organization and Markets Healthcare Cost and Utilization Project (HCUP). National Inpatient Sample (NIS) and Nationwide Emergency Department Sample (NEDS), 2013.
4. Todd KH, Miner JR. Pain in the emergency room. In: Fishman SM, Ballantyne JC, Rathmell JP, eds. *Bonica's Management of Pain*. Philadelphia, PA, USA: Lippincott, Williams and Wilkins 2010:1576–87.
5. Todd KH, Ducharme J, Choiniere M, et al. Pain in the emergency department: results of the pain and emergency medicine initiative (PEMI) multicenter study. *The journal of pain : official journal of the American Pain Society* 2007;8(6):460-6. doi: 10.1016/j.jpain.2006.12.005 [published Online First: 2007/02/20]
6. Vadivelu N, Mitra S, Hines R, et al. Acute pain in undergraduate medical education: an unfinished chapter! *Pain practice : the official journal of World Institute of Pain* 2012;12(8):663-71. doi: 10.1111/j.1533-2500.2012.00580.x [published Online First: 2012/06/21]

- 1  
2  
3 7. Fishman SM, Young HM, Lucas Arwood E, et al. Core competencies for pain management:  
4  
5 results of an interprofessional consensus summit. *Pain medicine (Malden, Mass)*  
6  
7 2013;14(7):971-81. doi: 10.1111/pme.12107 [published Online First: 2013/04/13]  
8  
9
- 10 8. Watt-Watson J, Murinson BB. Current challenges in pain education. *Pain management*  
11  
12 2013;3(5):351-7. doi: 10.2217/pmt.13.39 [published Online First: 2014/03/25]  
13  
14
- 15 9. Côté P, Shearer H, Ameis A, et al. Enabling recovery from common traffic injuries: A focus  
16  
17 on the injured person. January 31, 2015; UOIT-CMCC Centre for the Study of Disability  
18  
19 Prevention and Rehabilitation.  
20
- 21 10. Moher D, Shamseer L, Clarke M, et al. Preferred reporting items for systematic review and  
22  
23 meta-analysis protocols (PRISMA-P) 2015 statement. *Systematic reviews* 2015;4:1. doi:  
24  
25 10.1186/2046-4053-4-1 [published Online First: 2015/01/03]  
26  
27
- 28 11. Chou R, Deyo R, Friedly J, et al. Nonpharmacologic Therapies for Low Back Pain: A  
29  
30 Systematic Review for an American College of Physicians Clinical Practice Guideline.  
31  
32 *Ann Intern Med* 2017;166(7):493-505. doi: 10.7326/m16-2459 [published Online First:  
33  
34 2017/02/14]  
35  
36
- 37 12. Chou R, Deyo R, Friedly J, et al. Systemic Pharmacologic Therapies for Low Back Pain: A  
38  
39 Systematic Review for an American College of Physicians Clinical Practice Guideline.  
40  
41 *Ann Intern Med* 2017;166(7):480-92. doi: 10.7326/m16-2458 [published Online First:  
42  
43 2017/02/14]  
44  
45
- 46 13. Landis JR, Koch GG. The measurement of observer agreement for categorical data.  
47  
48 *Biometrics* 1977;33(1):159-74. [published Online First: 1977/03/01]  
49  
50  
51  
52  
53  
54  
55  
56  
57

- 1  
2  
3 14. Tendal B, Nuesch E, Higgins JP, et al. Multiplicity of data in trial reports and the reliability  
4 of meta-analyses: empirical study. *Bmj* 2011;343:d4829. doi: 10.1136/bmj.d4829  
5  
6 [published Online First: 2011/09/01]  
7  
8  
9  
10 15. Higgins JPT, Altman DG, Gøtzsche PC, et al. The Cochrane Collaboration's tool for  
11 assessing risk of bias in randomised trials. *BMJ* 2011;343:d5928. doi:  
12  
13 <http://dx.doi.org/10.1136/bmj.d5928>  
14  
15  
16  
17 16. Akl EA, Sun X, Busse JW, et al. Specific instructions for estimating unclearly reported  
18 blinding status in randomized trials were reliable and valid. *J Clin Epidemiol*  
19  
20 2012;65(3):262-67. doi: <http://dx.doi.org/10.1016/j.jclinepi.2011.04.015>  
21  
22  
23  
24 17. Taanila H, Suni JH, Kannus P, et al. Risk factors of acute and overuse musculoskeletal  
25 injuries among young conscripts: a population-based cohort study. *BMC musculoskeletal*  
26  
27 *disorders* 2015;16:104. doi: 10.1186/s12891-015-0557-7 [published Online First:  
28  
29 2015/05/01]  
30  
31  
32  
33 18. de Vos Andersen NB, Kent P, Hjort J, et al. Clinical course and prognosis of musculoskeletal  
34 pain in patients referred for physiotherapy: does pain site matter? *BMC musculoskeletal*  
35  
36 *disorders* 2017;18(1):130. doi: 10.1186/s12891-017-1487-3 [published Online First:  
37  
38 2017/03/31]  
39  
40  
41  
42 19. Australian Acute Musculoskeletal Pain Guidelines Group. Evidence-based management of  
43 acute musculoskeletal pain. *ISBN 1 875378 49 9 2003*  
44  
45  
46  
47 20. Babatunde OO, Jordan JL, Van der Windt DA, et al. Effective treatment options for  
48 musculoskeletal pain in primary care: A systematic overview of current evidence. *PLoS*  
49  
50 *One* 2017;12(6):e0178621. doi: 10.1371/journal.pone.0178621 [published Online First:  
51  
52 2017/06/24]  
53  
54  
55  
56  
57  
58  
59  
60

- 1  
2  
3 21. Higgins JP, Green S. Cochrane Handbook for Systematic Reviews of Interventions, version  
4 [5.1.0] (updated March 2011). The Cochrane Collaboration, 2011.  
5  
6  
7  
8 22. Thorlund K, Walter SD, Johnston BC, et al. Pooling health-related quality of life outcomes in  
9 meta-analysis-a tutorial and review of methods for enhancing interpretability. *Res Synth*  
10 *Methods* 2011;2(3):188-203. doi: 10.1002/jrsm.46 [published Online First: 2011/09/01]  
11  
12  
13  
14 23. DerSimonian R, Laird N. Meta-analysis in clinical trials. *Controlled clinical trials*  
15 1986;7(3):177-88.  
16  
17  
18  
19 24. Busse JW, Bartlett SJ, Dougados M, et al. Optimal Strategies for Reporting Pain in Clinical  
20 Trials and Systematic Reviews: Recommendations from an OMERACT 12 Workshop.  
21 *The Journal of rheumatology* 2015;42(10):1962-70. doi: 10.3899/jrheum.141440  
22 [published Online First: 2015/05/17]  
23  
24  
25  
26  
27  
28 25. Schunemann HJ, Guyatt GH. Commentary--goodbye M(C)ID! Hello MID, where do you  
29 come from? *Health services research* 2005;40(2):593-7. doi: 10.1111/j.1475-  
30 6773.2005.00374.x [published Online First: 2005/03/15]  
31  
32  
33  
34  
35 26. Busse JW, Wang L, Kamaleldin M, et al. Opioids for Chronic Noncancer Pain: A Systematic  
36 Review and Meta-analysis. [Submitted] 2018(Accepted for publication)  
37  
38  
39  
40 27. White IR. Network meta-analysis. *The Stata Journal* 2015;15(4):951-85.  
41  
42 28. White IR, Barrett JK, Jackson D, et al. Consistency and inconsistency in network meta-  
43 analysis: model estimation using multivariate meta-regression. *Res Synth Methods*  
44 2012;3(2):111-25. doi: 10.1002/jrsm.1045 [published Online First: 2012/06/01]  
45  
46  
47  
48  
49 29. Donegan S, Williamson P, D'Alessandro U, et al. Assessing key assumptions of network  
50 meta-analysis: a review of methods. *Res Synth Methods* 2013;4(4):291-323. doi:  
51 10.1002/jrsm.1085  
52  
53  
54  
55  
56  
57  
58  
59  
60

- 1  
2  
3 30. Higgins JPT, Thompson SG, Deeks JJ, et al. Measuring inconsistency in meta-analyses. *BMJ*  
4 2003;327(7414):557-60. doi: <http://dx.doi.org/10.1136/bmj.327.7414.557>  
5  
6  
7  
8 31. Lu G, Ades AE. Assessing evidence inconsistency in mixed treatment comparisons. *J Am*  
9 *Stat Assoc* 2006;101(474):447-59. doi: 10.1198/016214505000001302  
10  
11  
12 32. Higgins JP, Jackson D, Barrett JK, et al. Consistency and inconsistency in network meta-  
13 analysis: concepts and models for multi-arm studies. *Res Synth Methods* 2012;3(2):98-  
14 110. doi: 10.1002/jrsm.1044 [published Online First: 2012/06/01]  
15  
16  
17  
18 33. Salanti G, Ades AE, Ioannidis JPA. Graphical methods and numerical summaries for  
19 presenting results from multiple-treatment meta-analysis: an overview and tutorial. *J Clin*  
20 *Epidemiol* 2011;64(2):163-71. doi: <http://dx.doi.org/10.1016/j.jclinepi.2010.03.016>  
21  
22  
23  
24 34. Mbuagbaw L, Rochwerg B, Jaeschke R, et al. Approaches to interpreting and choosing the  
25 best treatments in network meta-analyses. *Systematic reviews* 2017;6(1):79. doi:  
26 10.1186/s13643-017-0473-z [published Online First: 2017/04/14]  
27  
28  
29  
30 35. Trinquart L, Attiche N, Bafeta A, et al. Uncertainty in Treatment Rankings: Reanalysis of  
31 Network Meta-analyses of Randomized Trials. *Ann Intern Med* 2016;164(10):666-73.  
32 doi: 10.7326/m15-2521 [published Online First: 2016/04/19]  
33  
34  
35  
36 36. Guyatt GH, Oxman AD, Vist GE, et al. GRADE: an emerging consensus on rating quality of  
37 evidence and strength of recommendations. *BMJ* 2008;336(7650):924-26. doi:  
38 10.1136/bmj.39489.470347.AD  
39  
40  
41  
42 37. Higgins JPT, Green S. Cochrane Handbook for Systematic Reviews of Interventions Version  
43 5.1.0 [updated March 2011]. 2011; Available from <http://handbook-5-1.cochrane.org/>  
44 (Accessed October 25, 2018)  
45  
46  
47  
48  
49  
50  
51  
52  
53  
54  
55  
56  
57  
58  
59  
60

- 1  
2  
3 38. Begg CB, Mazumdar M. Operating characteristics of a rank correlation test for publication  
4 bias. *Biometrics* 1994;50(4):1088-101. [published Online First: 1994/12/01]  
5  
6  
7  
8 39. Puhan MA, Schünemann HJ, Murad MH, et al. A GRADE Working Group approach for  
9 rating the quality of treatment effect estimates from network meta-analysis. *BMJ*  
10 2014;349:5630. doi: 10.1136/bmj.g5630  
11  
12  
13  
14 40. Brignardello-Petersen R, Bonner A, Alexander PE, et al. Advances in the GRADE approach  
15 to rate the certainty in estimates from a network meta-analysis. *Journal of clinical*  
16 *epidemiology* 2018;93:36-44. doi: 10.1016/j.jclinepi.2017.10.005 [published Online First:  
17 2017/10/21]  
18  
19  
20  
21  
22  
23  
24 41. Salanti G, Higgins JP, Ades A, et al. Evaluation of networks of randomized trials. *Stat*  
25 *Methods Med Res* 2008;17(3):279-301.  
26  
27  
28  
29  
30  
31  
32  
33  
34  
35  
36  
37  
38  
39  
40  
41  
42  
43  
44  
45  
46  
47  
48  
49  
50  
51  
52  
53  
54  
55  
56  
57  
58  
59  
60

## Appendix: Literature Search Strategies

Summary of search and strategies ACP Acute MSK Pain

Feb 14, 2018

Database: OVID Medline Epub Ahead of Print, In-Process & Other Non-Indexed Citations, Ovid MEDLINE(R) Daily and Ovid MEDLINE(R) 1946 to Present

Search Strategy:

-----

1 exp arm injuries/ or athletic injuries/ or exp joint dislocations/ or exp fractures, bone/ or fractures, cartilage/ or exp hand injuries/ or exp hip injuries/ or exp leg injuries/ or exp neck injuries/ or occupational injuries/ or exp shoulder injuries/ or exp soft tissue injuries/ or exp "sprains and strains"/ or exp tendon injuries/ or exp Compartment Syndromes/ or exp Bone Malalignment/ (300813)

2 (exp Musculoskeletal system/ or musculoskeletal diseases/ or osteitis/ or exp cartilage diseases/ or exp fasciitis/ or exp bursitis/ or exp metatarsalgia/ or exp synovitis/ or muscle cramp/ or myalgia/ or exp tendinopathy/) and pain\*.ti,ab. (87772)

3 Musculoskeletal Pain/ or Neck Pain/ or Acute Pain/ or exp Arthralgia/ (19422)

4 (Arthralgi\* or bursitis or capsulit\* or epicondylalgia\* or epicondylit\* or fasciopath\* or fasciitis or fascitis or metatarsalgi\* or myalgi\* or myelitis or myopath\* or myosit\* or osteitis or osteochondritis or osteomyelitis or polymyositis\* or radiculopath\* or radiculit\* or synovit\* or tend?nopath\* or tendinit\* or tenosynovit\* or whiplash or WAD).tw. (111653)

5 ((ligament or tendon or supraspinatus or infraspinatus or subscapularis or teres minor or teres major or trapezius or deltoid or bicep\* or bicipital or coracobrachialis or deltoid or fibularis or talofibular or calcaneofibular or calcaneotibial or tibio\* or rotator cuff) adj3 (injur\* or impair\* or imping\* or sprain\* or strain\* or tear or torn)).tw. (14400)

6 ((myofascial or neck\* or cervical\* or musculoskeletal\* or MSK or elbow\* or arm\* or finger\* or hand\* or wrist\* or forearm\* or leg or ankle\* or knee\* or hip\* or foot\* or toe\* or femur\* or radius or radii or tibia\* or ulna\* or humerus or humeri or metatarsal\* or metacarpal\* or fibula\* or patella\* or patellofemoral or carpal\* or tarsal\* or phalange\* or clavicle\* or scapula\* or bone\* or joint\* or muscle\* or shoulder\*) adj3 (sprain\* or strain\* or injur\* or impair\* or fractur\* or break\* or broken or disorder\* or pain\*)).tw. (235481)

7 or/1-6 (587971)

8 randomized controlled trial.pt. or randomi?ed.mp. or placebo.mp. (810530)

9 ((treatment or control) adj3 group\*).ab. (511607)

10 (allocat\* adj5 group\*).ab. (20402)

11 ((clinical or control\*) adj3 trial).ti,ab,kw. (226548)

12 or/8-11 (1258485)

13 7 and 12 (46565)

14 exp animals/ not humans.sh. (4424690)

15 13 not 14 (42705)

16 adult.mp. or middle aged.sh. or age:.tw. (8090446)

17 15 and 16 (30798)

18 limit 15 to "all adult (19 plus years)" (28434)

19 17 or 18 (31999)

20 treatment outcome/ (824861)

21 Pain Measurement/ (75370)



- 1  
2  
3 22 "Recovery of Function"/ (42703)  
4 23 ((disability or function\* or recover\* or pain\* or analog\*) adj3 (measur\* or evaluat\* or  
5 scale or status or test\* or assess\* or rating\* or index or questionnaire)).mp. (586581)  
6 24 (VAS or "visual analog\*" or "numeric\* rating scale" or "point scale" or comfort\* or  
7 "Disabilities of the Arm Shoulder and Hand" or DASH or "Shoulder Pain and Disability Index"  
8 or SPDI or "mcgill pain" or BPI or "brief pain" or improvement).mp. (628803)  
9 25 Return to Work/ or Return to Sport/ or ((return or resump\*) adj3 (work or sport or play or  
10 activit\*)).mp. (16520)  
11 26 pain\*.jw,ti. (199639)  
12 27 pain\*.ab. /freq=2 (243208)  
13 28 or/20-27 (2035376)  
14 29 19 and 28 (20709)  
15 30 exp appendicitis/ or exp Back Pain/ or Labor Pain/ or exp Pain, Postoperative/ or exp  
16 Toothache/ or headache/ or exp Headache disorders/ or exp dentistry/ or exp Neoplasms/  
17 (3499077)  
18 31 (pain\* adj3 (chronic or dental or labo?r or back or low back or spine or spinal or lumbar or  
19 sciatic\* or cancer\*)).mp. (118740)  
20 32 (sciatica or backache or dorsalgia or lumbago or toothache or migraine or appendicitis or  
21 metastas\*).mp. (463484)  
22 33 or/30-32 (3631063)  
23 34 29 not 33 (13769)  
24 35 (clinic\* or practi\* or primary or physician\* or refer\* or visit\* or outpatient\* or consult\* or  
25 family or communit\* or ambulatory or centre\* or center\* or office or sport\*).ti,ab. (7012189)  
26 36 34 and 35 (9481)  
27 37 Osteoarthritis/ (33247)  
28 38 exp arthroplasty/ or exp arthroscopy/ or bone transplantation/ (101224)  
29 39 su.fs. (1807708)  
30 40 or/37-39 (1863671)  
31  
32  
33  
34  
35

36 Feb 14, 2018

37 Database: Embase <1974 to 2018 February 13>

38 Search Strategy:

39 -----  
40  
41 1 limb injury/ or exp arm injury/ or exp leg injury/ or exp limb fracture/ or sport injury/ or exp  
42 joint injury/ or musculoskeletal injury/ or exp cartilage injury/ or exp "ligament and tendon  
43 injury"/ or medial tibial stress syndrome/ or muscle injury/ or overexertion/ or exp sprain/ or  
44 fracture/ or avulsion fracture/ or clavicle fracture/ or comminuted fracture/ or fracture  
45 dislocation/ or exp fracture healing/ or intraarticular fracture/ or exp joint fracture/ or exp limb  
46 fracture/ or exp multiple fracture/ or exp scapula fracture/ or stress fracture/ or neck injury/ or  
47 whiplash injury/ or occupational accident/ or soft tissue injury/ or compartment syndrome/  
48 (382802)  
49

50 Annotation: includes arm injury/ or exp arm fracture/ or elbow dislocation/ or elbow injury/ or  
51 exp forearm injury/ or exp hand injury/ or exp shoulder injury/ or exp wrist injury/ or leg injury/  
52 or exp ankle injury/ or exp foot injury/ or exp hip injury/ or exp knee injury/ or exp leg fracture/  
53 or tibia torsion/ or exp ankle injury/ or exp dislocation/ or exp hip injury/ or intraarticular  
54  
55  
56  
57  
58  
59  
60

1  
2  
3 fracture/ or exp joint fracture/ or exp knee injury/ or posttraumatic arthropathy/ or exp wrist  
4 injury/

5 2 (exp musculoskeletal system/ or exp musculoskeletal disease/) and pain\*.ti,ab. (312623)

6 3 musculoskeletal pain/ or neck pain/ or shoulder pain/ or arthralgia/ (86878)

7 4 or/1-3 (692780)

8 Annotation: emtree terms condition MSK pain

9 5 (Arthralgi\* or bursitis or capsulit\* or epicondylgia\* or epicondylit\* or fasciopath\* or  
10 fasciitis or fascitis or metatarsalgi\* or myalgi\* or myelitis or myopath\* or myositis\* or osteitis or  
11 osteochondritis or osteomyelitis or polymyositis\* or radiculopath\* or radiculit\* or synovit\* or  
12 tend?nopath\* or tendinit\* or tenosynovit\* or whiplash or WAD).tw. (147804)

13 6 ((ligament or tendon or supraspinatus or infraspinatus or subscapularis or teres minor or  
14 teres major or trapezius or deltoid or bicep\* or bicipital or coracobrachialis or deltoid or fibularis  
15 or talofibular or calcaneofibular or calcaneotibial or tibio\* or rotator cuff) adj3 (injur\* or impair\*  
16 or imping\* or sprain\* or strain\* or tear or torn)).tw. (16617)

17 7 ((myofascial or neck\* or cervical\* or musculoskeletal\* or MSK or elbow\* or arm\* or  
18 finger\* or hand\* or wrist\* or forearm\* or leg or ankle\* or knee\* or hip\* or foot\* or toe\* or  
19 femur\* or radius or radii or tibia\* or ulna\* or humerus or humeri or metatarsal\* or metacarpal\*  
20 or fibula\* or patella\* or patellofemoral or carpal\* or tarsal\* or phalange\* or clavicle\* or  
21 scapula\* or bone\* or joint\* or muscle\* or shoulder\*) adj3 (sprain\* or strain\* or injur\* or impair\*  
22 or fractur\* or break\* or broken or disorder\* or pain\*).tw. (305948)

23 8 or/5-7 (444822)

24 Annotation: free text terms condition MSK pain

25 9 4 or 8 (897318)

26 Annotation: MSK pain

27 10 exp animals/ or exp invertebrate/ or animal experiment/ or animal model/ or animal tissue/  
28 or animal cell/ or nonhuman/ (25540585)

29 11 human/ or normal human/ or human cell/ (19287963)

30 12 10 and 11 (19240053)

31 13 10 not 12 (6300532)

32 14 9 not 13 (837728)

33 15 random:.tw. or placebo:.mp. or double-blind:.tw. (1509046)

34 Annotation: HIRU specific RCT filter

35 16 ((treatment or control) adj3 group\*).ab. (723604)

36 17 (allocat\* adj5 group\*).ab. (26448)

37 18 ((clinical or control\*) adj3 trial).ti,ab,kw. (327340)

38 19 or/15-18 (2107446)

39 Annotation: modified RCT filter

40 20 14 and 19 (95790)

41 Annotation: MSK pain with mod RCT filter

42 21 treatment outcome/ (762155)

43 22 outcome assessment/ (400641)

44 23 pain measurement/ (4687)

45 24 exp pain assessment/ (134012)

46 25 convalescence/ (42381)

47 26 return to sport/ or return to work/ (4870)

48 27 work resumption/ (3467)

1  
2  
3 28 ((disability or function\* or recover\* or pain\* or analog\*) adj3 (measur\* or evaluat\* or  
4 scale or status or test\* or assess\* or rating\* or index or questionnaire)).mp. (790797)  
5 29 (VAS or "visual analog\*" or "numeric\* rating scale" or "point scale" or comfort\* or  
6 "Disabilities of the Arm Shoulder and Hand" or DASH or "Shoulder Pain and Disability Index"  
7 or SPDI or "mcgill pain" or BPI or "brief pain" or improvement).mp. (911685)  
8 30 ((return or resump\*) adj3 (work or sport or play or activit\*)).mp. (23514)  
9 31 pain\*.jw,ti. (269095)  
10 32 pain\*.ab. /freq=2 (358966)  
11 33 or/21-32 (2816037)  
12 34 20 and 33 (58373)

13  
14  
15 Annotation: MSK pain with mod RCT and outcome

16 35 exp appendicitis/ or exp backache/ or labor pain/ or exp postoperative complication/ or exp  
17 tooth disease/ or headache/ or exp dentistry/ or exp malignant neoplasm/ or exp metastasis/  
18 (4067682)

19 36 (pain\* adj3 (chronic or dental or labo?r or back or low back or spine or spinal or lumbar or  
20 sciatic\* or cancer\*)).mp. (189693)

21 37 (sciatica or backache or dorsalgia or lumbago or toothache or migraine or metastas\* or  
22 appendicitis).mp. (778837)

23 38 35 or 36 or 37 (4238484)

24 39 34 not 38 (30664)

25  
26 Annotation: mod RCT set

27 40 (clinic\* or practi\* or primary or physician\* or refer\* or visit\* or outpatient\* or consult\* or  
28 family or communit\* or ambulatory or centre\* or center\* or office or sport\*).ti,ab. (9180696)

29  
30 Annotation: Gill 2014 primary care plus sport

31 41 39 and 40 (21784)

32 42 exp osteoarthritis/ (110006)

33 43 bone transplantation/ or exp bone graft/ (46349)

34 44 exp orthopedic surgery/ (406039)

35  
36 Annotation: includes exp joint surgery/ or exp arthroplasty/

37 45 su.fs. (1950489)

38 46 or/42-45 (2224706)

39  
40 Cochrane Library

41 Search Name: 2017-08-22 ACP acute msk pain search

42 Date Run: 14/02/18 20:52:03.682

43 Description:

44  
45  
46 ID Search Hits

47 #1 Arthralgi\* or bursitis or capsulit\* or epicondylgia\* or epicondyli\* or fasciopath\* or  
48 fasciitis or fascitis or metatarsalgi\* or myalgi\* or myelitis or myopath\* or myosit\* or osteitis or  
49 osteochondritis or osteomyelitis or polymyosit\* or radiculopath\* or radiculit\* or synovit\* or  
50 tend?nopath\* or tendinit\* or tenosynovit\* or whiplash or WAD 13121

51 #2 ((ligament or tendon or supraspinatus or infraspinatus or subscapularis or teres minor or  
52 teres major or trapezius or deltoid or bicep\* or bicipital or coracobrachialis or deltoid or fibularis  
53 or talofibular or calcaneofibular or calcaneotibial or tibio\* or rotator cuff) near/3 (injur\* or  
54 impair\* or imping\* or sprain\* or strain\* or tear or torn)) 2044

- 1  
2  
3 #3 ((myofascial or neck\* or cervical\* or musculoskeletal\* or MSK or elbow\* or arm\* or  
4 finger\* or hand\* or wrist\* or forearm\* or leg or ankle\* or knee\* or hip\* or foot\* or toe\* or  
5 femur\* or radius or radii or tibia\* or ulna\* or humerus or humeri or metatarsal\* or metacarpal\*  
6 or fibula\* or patella\* or patellofemoral or carpal\* or tarsal\* or phalange\* or clavicle\* or  
7 scapula\* or bone\* or joint\* or muscle\* or shoulder\*) near/3 (sprain\* or strain\* or injur\* or  
8 impair\* or fractur\* or break\* or broken or disorder\* or pain\*)) 38249  
9  
10 #4 #1 or #2 or #3 47667  
11 #5 ((disability or function\* or recover\* or pain\* or analog\*) near/3 (measur\* or evaluat\* or  
12 scale or status or test\* or assess\* or rating\* or index or questionnaire)) 109526  
13 #6 VAS or "visual analog\*" or "numeric\* rating scale" or "point scale" or comfort\* or  
14 "Disabilities of the Arm Shoulder and Hand" or DASH or "Shoulder Pain and Disability Index"  
15 or SPDI or "mcgill pain" or BPI or "brief pain" or improvement 139538  
16 #7 ((return or resump\*) near/3 (work or sport or play or activit\*)) 3128  
17 #8 pain\*:so 8908  
18 #9 pain\*:ti 34759  
19 #10 #5 or #6 or #7 or #8 or #9 214594  
20 #11 #4 and #10 24648  
21 #12 (pain\* near/3 (chronic or dental or labo?r or back or low back or spine or spinal or  
22 lumbar or sciatic\* or cancer\*)) 20816  
23 #13 sciatica or backache or dorsalgia or lumbago or toothache or migraine or appendicitis or  
24 metastas\* 27428  
25 #14 #12 or #13 45616  
26 #15 #11 not #14 18297  
27 #16 clinic\* or practi\* or primary or physician\* or refer\* or visit\* or outpatient\* or consult\* or  
28 family or communit\* or ambulatory or centre\* or center\* or office or sport\* 937038  
29 #17 #15 and #16 in Trials, with Wounds Group, Injuries Group, Pain, Palliative and  
30 Supportive Care Group, Musculoskeletal Group, Bone, Joint and Muscle Trauma Group, Back  
31 Group or Occupational Safety and Health Group in Review Groups  
32  
33  
34  
35  
36  
37  
38

### 39 CINAHL

|                                                                                                                                                                                                                                                                                                                             |         |
|-----------------------------------------------------------------------------------------------------------------------------------------------------------------------------------------------------------------------------------------------------------------------------------------------------------------------------|---------|
| 42 S73 S66 NOT S72                                                                                                                                                                                                                                                                                                          | 5,571   |
| 43 S72 S67 OR S68 OR S69 OR S70 OR S71                                                                                                                                                                                                                                                                                      | 224,577 |
| 44 S71 (MM "Surgery, Operative+")                                                                                                                                                                                                                                                                                           | 211,375 |
| 45 S70 (MH "Arthroscopy")                                                                                                                                                                                                                                                                                                   | 4,418   |
| 46 S69 (MH "Arthroplasty")                                                                                                                                                                                                                                                                                                  | 1,646   |
| 47 S68 (MH "Bone Transplantation")                                                                                                                                                                                                                                                                                          | 3,342   |
| 48 S67 (MH "Osteoarthritis+")                                                                                                                                                                                                                                                                                               | 13,152  |
| 49 S66 S64 AND S65                                                                                                                                                                                                                                                                                                          | 8,761   |
| 50 S65 TI ( clinic* or practi* or primary or physician* or refer* or visit* or outpatient* or<br>51 consult* or family or communit* or ambulatory or centre* or center* or office or sport* ) OR<br>52 AB ( clinic* or practi* or primary or physician* or refer* or visit* or outpatient* or consult* or<br>53<br>54<br>55 |         |

|    |                                                                                                |         |
|----|------------------------------------------------------------------------------------------------|---------|
| 1  |                                                                                                |         |
| 2  |                                                                                                |         |
| 3  | family or communit* or ambulatory or centre* or center* or office or sport* )                  |         |
| 4  | 1,131,403                                                                                      |         |
| 5  | S64 S51 NOT S63                                                                                | 15,217  |
| 6  | S63 S60 OR S61 OR S62                                                                          | 359,216 |
| 7  | S62 TX sciatica or backache or dorsalgia or lumbago or toothache or migraine or appendicitis   |         |
| 8  | or metastas*                                                                                   | 35,825  |
| 9  | S61 TX (pain* N3 (chronic or dental or labo?r or back or low back or spine or spinal or lumbar |         |
| 10 | or sciatic* or cancer*))                                                                       | 49,583  |
| 11 | S60 S52 OR S53 OR S54 OR S55 OR S56 OR S57 OR S58 OR S59                                       | 329,798 |
| 12 | S59 (MH "Neoplasms+")                                                                          | 240,613 |
| 13 | S58 (MH "Dentistry+")                                                                          | 47,838  |
| 14 | S57 (MH "Headache+")                                                                           | 16,196  |
| 15 | S56 (MH "Toothache")                                                                           | 327     |
| 16 | S55 (MH "Postoperative Pain")                                                                  | 8,206   |
| 17 | S54 (MH "Labor Pain")                                                                          | 1,533   |
| 18 | S53 (MH "Back Pain+")                                                                          | 18,740  |
| 19 | S52 (MH "Appendicitis")                                                                        | 1,293   |
| 20 | S51 S17 AND S39 AND S48                                                                        | 20,097  |
| 21 | S50 S48 AND S49                                                                                | 20,097  |
| 22 | S49 S17 AND S39                                                                                | 33,880  |
| 23 | S48 S40 OR S41 OR S42 OR S43 OR S44 OR S45 OR S46 OR S47                                       | 457,089 |
| 24 | S47 SO pain*                                                                                   | 30,433  |
| 25 | S46 TI pain*                                                                                   | 68,365  |
| 26 | S45 TX ((disability or function* or recover* or pain* or analog*) N3 (measur* or evaluat* or   |         |
| 27 | scale or status or test* or assess* or rating* or index or questionnaire)).                    | 143,200 |
| 28 | S44 TX VAS or "visual analog*" or "numeric* rating scale" or "point scale" or comfort* or      |         |
| 29 | "Disabilities of the Arm Shoulder and Hand" or DASH or "Shoulder Pain and Disability Index"    |         |
| 30 | or SPDI or "mcgill pain" or BPI or "brief pain" or improvement                                 | 174,142 |
| 31 | S43 TX ((return or resump*) N3 (work or sport or play or activit*))                            | 6,311   |
| 32 | S42 (MH "Job Re-Entry") OR (MH "Sports Re-Entry") OR (MH "School Re-Entry")                    | 6,819   |
| 33 | S41 (MH "Pain Measurement")                                                                    | 27,842  |
| 34 | S40 (MH "Treatment Outcomes")                                                                  | 150,811 |
| 35 | S39 S37 NOT S38                                                                                | 563,918 |
| 36 | S38 (MH "Animals+")                                                                            | 37,258  |
| 37 | S37 S24 OR S29 OR S36                                                                          | 568,264 |
| 38 | S36 S30 OR S31 OR S32 OR S33 OR S34 OR S35                                                     | 495,048 |
| 39 | S35 (MH "Prospective Studies+")                                                                | 213,854 |
| 40 | S34 (MH "Evaluation Research+")                                                                | 41,488  |
| 41 | S33 (MH "Comparative Studies")                                                                 | 101,882 |
| 42 | S32 "latin square"                                                                             | 138     |
| 43 | S31 (MH "Study Design") OR (MH "Crossover Design") OR (MH "Experimental Studies+")             |         |
| 44 | 207,529                                                                                        |         |
| 45 | S30 (MH "Random Sample+")                                                                      | 67,305  |
| 46 | S29 S25 OR S26 OR S27 OR S28                                                                   | 211,728 |
| 47 | S28 "random*"                                                                                  | 203,059 |
| 48 | S27 "placebo*"                                                                                 | 33,694  |
| 49 |                                                                                                |         |
| 50 |                                                                                                |         |
| 51 |                                                                                                |         |
| 52 |                                                                                                |         |
| 53 |                                                                                                |         |
| 54 |                                                                                                |         |
| 55 |                                                                                                |         |
| 56 |                                                                                                |         |
| 57 |                                                                                                |         |
| 58 |                                                                                                |         |
| 59 |                                                                                                |         |
| 60 |                                                                                                |         |

|    |                                                                                                        |         |
|----|--------------------------------------------------------------------------------------------------------|---------|
| 1  |                                                                                                        |         |
| 2  |                                                                                                        |         |
| 3  | S26 (MH "Placebos")                                                                                    | 8,296   |
| 4  | S25 (MH "Placebo Effect")                                                                              | 1,210   |
| 5  | S24 S18 OR S19 OR S20 OR S21 OR S22 OR S23                                                             | 195,829 |
| 6  | S23 "triple-blind"                                                                                     | 136     |
| 7  | S22 "single-blind"                                                                                     | 8,460   |
| 8  | S21 "double-blind"                                                                                     | 29,322  |
| 9  | S20 clinical W3 trial                                                                                  | 124,429 |
| 10 | S19 "randomi?ed controlled trial*"                                                                     | 69,029  |
| 11 | S18 (MH "Clinical Trials+")                                                                            | 155,173 |
| 12 | S17 S5 OR S10 OR S15                                                                                   | 132,229 |
| 13 | S16 S11 OR S15                                                                                         | 132,229 |
| 14 | S15 S12 OR S13 OR S14                                                                                  | 98,300  |
| 15 | S14 TX ((myofascial or neck* or cervical* or musculoskeletal* or MSK or elbow* or arm* or              |         |
| 16 | finger* or hand* or wrist* or forearm* or leg or ankle* or knee* or hip* or foot* or toe* or           |         |
| 17 | femur* or radius or radii or tibia* or ulna* or humerus or humeri or metatarsal* or metacarpal*        |         |
| 18 | or fibula* or patella* or patellofemoral or carpal* or tarsal* or phalange* or clavicle* or            |         |
| 19 | scapula* or bone* or joint* or muscle* or shoulder*) N3 (sprain* or strain* or injur* or impair*       |         |
| 20 | or fractur* or break* or broken or disorder* or pain*))                                                | 78,680  |
| 21 | S13 TX ((ligament or tendon or supraspinatus or infraspinatus or subscapularis or teres minor          |         |
| 22 | or teres major or trapezius or deltoid or bicep* or bicipital or coracobrachialis or deltoid or        |         |
| 23 | fibularis or talofibular or calcaneofibular or calcaneotibial or tibio* or rotator cuff) N3 (injur* or |         |
| 24 | impair* or imping* or sprain* or strain* or tear or torn))                                             | 10,622  |
| 25 | S12 TX Arthralgi* or bursitis or capsulit* or epicondylalgia* or epicondylit* or fasciopath* or        |         |
| 26 | fasciitis or fascitis or metatarsalgi* or myalgi* or myelitis or myopath* or myosit* or osteitis or    |         |
| 27 | osteocondritis or osteomyelitis or polymyosit* or radiculopath* or radiculit* or synovit* or           |         |
| 28 | tend?nopath* or tendinit* or tenosynovit* or whiplash or WAD                                           | 20,095  |
| 29 | S11 S5 OR S10                                                                                          | 91,140  |
| 30 | S10 S8 AND S9                                                                                          | Display |
| 31 | S9 TI pain* OR AB pain*                                                                                | Display |
| 32 | S8 S6 OR S7                                                                                            | Display |
| 33 | S7 (MH "Musculoskeletal Diseases") OR (MH "Cartilage Diseases+") OR (MH "Fasciitis+")                  |         |
| 34 | OR (MH "Foot Diseases+") OR (MH "Golf Elbow") OR (MH "Heel Pain") OR (MH "Joint                        |         |
| 35 | Diseases") OR (MH "Muscular Diseases") OR (MH "Arthralgia+") OR (MH "Bursitis+") OR                    |         |
| 36 | (MH "Contracture+") OR (MH "Metatarsalgia") OR (MH "Shoulder Instability, Anterior") OR                |         |
| 37 | (MH "Shoulder Instability, Multidirectional") OR (MH "Shoulder Instability, Posterior") OR             |         |
| 38 | (MH "Synovitis")                                                                                       | Display |
| 39 | S6 (MH "Musculoskeletal System") OR (MH "Cartilage+") OR (MH "Fascia+") OR (MH                         |         |
| 40 | "Ligaments+") OR (MH "Muscles+") OR (MH "Bone and Bones") OR (MH "Arm Bones+")                         |         |
| 41 | OR (MH "Foot Bones+") OR (MH "Leg Bones+") OR (MH "Pelvic Bones+") OR (MH                              |         |
| 42 | "Joints+")                                                                                             | Display |
| 43 | S5 S1 OR S2 OR S3 OR S4                                                                                | Display |
| 44 | S4 (MH "Neck Pain")                                                                                    | Display |
| 45 | S3 (MH "Arthralgia+")                                                                                  | Display |
| 46 | S2 (MH "Compartment Syndromes") OR (MH "Anterior Compartment Syndrome") OR (MH                         |         |
| 47 | "Ischemic Contracture")                                                                                | Display |
| 48 |                                                                                                        |         |
| 49 |                                                                                                        |         |
| 50 |                                                                                                        |         |
| 51 |                                                                                                        |         |
| 52 |                                                                                                        |         |
| 53 |                                                                                                        |         |
| 54 |                                                                                                        |         |
| 55 |                                                                                                        |         |
| 56 |                                                                                                        |         |
| 57 |                                                                                                        |         |
| 58 |                                                                                                        |         |
| 59 |                                                                                                        |         |
| 60 |                                                                                                        |         |

1  
2  
3 S1 (MH "Arm Injuries+") OR (MH "Athletic Injuries+") OR (MH "Dislocations+") OR (MH  
4 "Fractures+") OR (MH "Hand Injuries+") OR (MH "Leg Injuries+") OR (MH "Ligament  
5 Injuries+") OR (MH "Neck Injuries+") OR (MH "Occupational-Related Injuries") OR (MH  
6 "Soft Tissue Injuries+") OR (MH "Sprains and Strains+") OR (MH "Tendon Injuries+")  
7  
8 Display  
9

10  
11 PEDro, yields 645  
12

13 March 13, 2018  
14

15  
16 Abstract & Title: acute  
17 AND  
18 Problem: pain  
19 AND  
20 Method: Clinical trial  
21  
22  
23  
24  
25  
26  
27  
28  
29  
30  
31  
32  
33  
34  
35  
36  
37  
38  
39  
40  
41  
42  
43  
44  
45  
46  
47  
48  
49  
50  
51  
52  
53  
54  
55  
56  
57  
58  
59  
60

# Reporting checklist for protocol of a systematic review.

Based on the PRISMA-P guidelines.

## Instructions to authors

Complete this checklist by entering the page numbers from your manuscript where readers will find each of the items listed below.

Your article may not currently address all the items on the checklist. Please modify your text to include the missing information. If you are certain that an item does not apply, please write "n/a" and provide a short explanation.

Upload your completed checklist as an extra file when you submit to a journal.

In your methods section, say that you used the PRISMA-P reporting guidelines, and cite them as:

Moher D, Shamseer L, Clarke M, Ghersi D, Liberati A, Petticrew M, Shekelle P, Stewart LA. Preferred Reporting Items for Systematic Review and Meta-Analysis Protocols (PRISMA-P) 2015 statement. *Syst Rev.* 2015;4(1):1.

|                |     | Reporting Item                                                                                                                                                              | Page Number |
|----------------|-----|-----------------------------------------------------------------------------------------------------------------------------------------------------------------------------|-------------|
| Identification | #1a | Identify the report as a protocol of a systematic review                                                                                                                    | 1           |
| Update         | #1b | If the protocol is for an update of a previous systematic review, identify as such                                                                                          | N/A         |
|                | #2  | If registered, provide the name of the registry (such as PROSPERO) and registration number                                                                                  | 4 & 8       |
| Contact        | #3a | Provide name, institutional affiliation, e-mail address of all protocol authors; provide physical mailing address of corresponding author                                   | 1           |
| Contribution   | #3b | Describe contributions of protocol authors and identify the guarantor of the review                                                                                         | 18          |
|                | #4  | If the protocol represents an amendment of a previously completed or published protocol, identify as such and list changes; otherwise, state plan for documenting important | 16          |



|    |                      |      |                                                                   |        |
|----|----------------------|------|-------------------------------------------------------------------|--------|
| 1  |                      |      | protocol amendments                                               |        |
| 2  | Sources              | #5a  | Indicate sources of financial or other support for the review     | 18     |
| 3  |                      |      |                                                                   |        |
| 4  | Sponsor              | #5b  | Provide name for the review funder and / or sponsor               | 18     |
| 5  |                      |      |                                                                   |        |
| 6  |                      |      |                                                                   |        |
| 7  | Role of sponsor or   | #5c  | Describe roles of funder(s), sponsor(s), and / or institution(s), | 18     |
| 8  | funder               |      | if any, in developing the protocol                                |        |
| 9  |                      |      |                                                                   |        |
| 10 |                      |      |                                                                   |        |
| 11 | Rationale            | #6   | Describe the rationale for the review in the context of what is   | 6      |
| 12 |                      |      | already known                                                     |        |
| 13 |                      |      |                                                                   |        |
| 14 | Objectives           | #7   | Provide an explicit statement of the question(s) the review will  | 7      |
| 15 |                      |      | address with reference to participants, interventions,            |        |
| 16 |                      |      | comparators, and outcomes (PICO)                                  |        |
| 17 |                      |      |                                                                   |        |
| 18 |                      |      |                                                                   |        |
| 19 |                      |      |                                                                   |        |
| 20 | Eligibility criteria | #8   | Specify the study characteristics (such as PICO, study design,    | 8 & 9  |
| 21 |                      |      | setting, time frame) and report characteristics (such as years    |        |
| 22 |                      |      | considered, language, publication status) to be used as           |        |
| 23 |                      |      | criteria for eligibility for the review                           |        |
| 24 |                      |      |                                                                   |        |
| 25 |                      |      |                                                                   |        |
| 26 |                      |      |                                                                   |        |
| 27 | Information          | #9   | Describe all intended information sources (such as electronic     | 8      |
| 28 | sources              |      | databases, contact with study authors, trial registers or other   |        |
| 29 |                      |      | grey literature sources) with planned dates of coverage           |        |
| 30 |                      |      |                                                                   |        |
| 31 |                      |      |                                                                   |        |
| 32 | Search strategy      | #10  | Present draft of search strategy to be used for at least one      | 25-32  |
| 33 |                      |      | electronic database, including planned limits, such that it       |        |
| 34 |                      |      | could be repeated                                                 |        |
| 35 |                      |      |                                                                   |        |
| 36 |                      |      |                                                                   |        |
| 37 | Study records -      | #11a | Describe the mechanism(s) that will be used to manage             | 9      |
| 38 | data management      |      | records and data throughout the review                            |        |
| 39 |                      |      |                                                                   |        |
| 40 |                      |      |                                                                   |        |
| 41 | Study records -      | #11b | State the process that will be used for selecting studies (such   | 9      |
| 42 | selection process    |      | as two independent reviewers) through each phase of the           |        |
| 43 |                      |      | review (that is, screening, eligibility and inclusion in meta-    |        |
| 44 |                      |      | analysis)                                                         |        |
| 45 |                      |      |                                                                   |        |
| 46 |                      |      |                                                                   |        |
| 47 |                      |      |                                                                   |        |
| 48 | Study records -      | #11c | Describe planned method of extracting data from reports           | 9 & 10 |
| 49 | data collection      |      | (such as piloting forms, done independently, in duplicate), any   |        |
| 50 | process              |      | processes for obtaining and confirming data from investigators    |        |
| 51 |                      |      |                                                                   |        |
| 52 |                      |      |                                                                   |        |
| 53 | Data items           | #12  | List and define all variables for which data will be sought       | 9 & 10 |
| 54 |                      |      | (such as PICO items, funding sources), any pre-planned data       |        |
| 55 |                      |      | assumptions and simplifications                                   |        |
| 56 |                      |      |                                                                   |        |
| 57 |                      |      |                                                                   |        |
| 58 |                      |      |                                                                   |        |
| 59 |                      |      |                                                                   |        |
| 60 |                      |      |                                                                   |        |

|    |                    |      |                                                                                 |         |
|----|--------------------|------|---------------------------------------------------------------------------------|---------|
| 1  | Outcomes and       | #13  | List and define all outcomes for which data will be sought,                     | 9 & 10  |
| 2  | prioritization     |      | including prioritization of main and additional outcomes, with                  |         |
| 3  |                    |      | rationale                                                                       |         |
| 4  |                    |      |                                                                                 |         |
| 5  |                    |      |                                                                                 |         |
| 6  | Risk of bias in    | #14  | Describe anticipated methods for assessing risk of bias of                      | 10      |
| 7  | individual studies |      | individual studies, including whether this will be done at the                  |         |
| 8  |                    |      | outcome or study level, or both; state how this information will                |         |
| 9  |                    |      | be used in data synthesis                                                       |         |
| 10 |                    |      |                                                                                 |         |
| 11 |                    |      |                                                                                 |         |
| 12 |                    |      |                                                                                 |         |
| 13 | Data synthesis     | #15a | Describe criteria under which study data will be quantitatively                 | 10 & 11 |
| 14 |                    |      | synthesised                                                                     |         |
| 15 |                    |      |                                                                                 |         |
| 16 |                    |      |                                                                                 |         |
| 17 |                    | #15b | If data are appropriate for quantitative synthesis, describe                    | 10-14   |
| 18 |                    |      | planned summary measures, methods of handling data and                          |         |
| 19 |                    |      | methods of combining data from studies, including any                           |         |
| 20 |                    |      | planned exploration of consistency (such as I <sup>2</sup> , Kendall's $\tau$ ) |         |
| 21 |                    |      |                                                                                 |         |
| 22 |                    |      |                                                                                 |         |
| 23 |                    |      |                                                                                 |         |
| 24 |                    | #15c | Describe any proposed additional analyses (such as                              | 14      |
| 25 |                    |      | sensitivity or subgroup analyses, meta-regression)                              |         |
| 26 |                    |      |                                                                                 |         |
| 27 |                    |      |                                                                                 |         |
| 28 |                    | #15d | If quantitative synthesis is not appropriate, describe the type                 | N/A     |
| 29 |                    |      | of summary planned                                                              |         |
| 30 |                    |      |                                                                                 |         |
| 31 | Meta-bias(es)      | #16  | Specify any planned assessment of meta-bias(es) (such as                        | 14      |
| 32 |                    |      | publication bias across studies, selective reporting within                     |         |
| 33 |                    |      | studies)                                                                        |         |
| 34 |                    |      |                                                                                 |         |
| 35 |                    |      |                                                                                 |         |
| 36 |                    |      |                                                                                 |         |
| 37 | Confidence in      | #17  | Describe how the strength of the body of evidence will be                       | 14 & 15 |
| 38 | cumulative         |      | assessed (such as GRADE)                                                        |         |
| 39 | evidence           |      |                                                                                 |         |
| 40 |                    |      |                                                                                 |         |
| 41 |                    |      |                                                                                 |         |

42 The PRISMA-P checklist is distributed under the terms of the Creative Commons Attribution License  
 43 CC-BY 4.0. This checklist was completed on 25. May 2018 using <http://www.goodreports.org/>, a tool  
 44 made by the [EQUATOR Network](#) in collaboration with [Penelope.ai](#)  
 45  
 46  
 47  
 48  
 49  
 50  
 51  
 52  
 53  
 54  
 55  
 56  
 57  
 58  
 59  
 60

# BMJ Open

## Management of acute musculoskeletal pain (excluding low back pain): a protocol for a systematic review and network meta-analysis of randomised trials

|                                 |                                                                                                                                                                                                                                                                                                                                                                                                                                                                                                                                                                                                                                           |
|---------------------------------|-------------------------------------------------------------------------------------------------------------------------------------------------------------------------------------------------------------------------------------------------------------------------------------------------------------------------------------------------------------------------------------------------------------------------------------------------------------------------------------------------------------------------------------------------------------------------------------------------------------------------------------------|
| Journal:                        | <i>BMJ Open</i>                                                                                                                                                                                                                                                                                                                                                                                                                                                                                                                                                                                                                           |
| Manuscript ID                   | bmjopen-2018-024441.R2                                                                                                                                                                                                                                                                                                                                                                                                                                                                                                                                                                                                                    |
| Article Type:                   | Protocol                                                                                                                                                                                                                                                                                                                                                                                                                                                                                                                                                                                                                                  |
| Date Submitted by the Author:   | 03-Feb-2019                                                                                                                                                                                                                                                                                                                                                                                                                                                                                                                                                                                                                               |
| Complete List of Authors:       | Busse, Jason; McMaster University, Anesthesia; McMaster University, Clinical Epidemiology & Biostatistics<br>Craigie, Samantha; McMaster University<br>Sadeghirad, Behnam; McMaster University<br>Couban, Rachel; McMaster University, Michael G. DeGroote Institute for Pain Research and Care<br>Hong, Patrick; University of Ottawa Faculty of Medicine<br>Oparin, Yvgeniy; McMaster University Department of Medicine<br>May, Curtis; University of British Columbia Faculty of Medicine<br>Lok, Annie; McMaster University Department of Anaesthesia<br>Guyatt, Gordon; McMaster University, Clinical Epidemiology and Biostatistics |
| <b>Primary Subject Heading</b>: | General practice / Family practice                                                                                                                                                                                                                                                                                                                                                                                                                                                                                                                                                                                                        |
| Secondary Subject Heading:      | Evidence based practice                                                                                                                                                                                                                                                                                                                                                                                                                                                                                                                                                                                                                   |
| Keywords:                       | acute pain, musculoskeletal, intervention, systematic review, network metanalysis                                                                                                                                                                                                                                                                                                                                                                                                                                                                                                                                                         |
|                                 |                                                                                                                                                                                                                                                                                                                                                                                                                                                                                                                                                                                                                                           |

SCHOLARONE™  
Manuscripts

1  
2  
3 **Management of acute musculoskeletal pain (excluding low back pain): a protocol for a**  
4 **systematic review and network meta-analysis of randomised trials**  
5  
6  
7

8 Jason W. Busse, \*<sup>1,2,3,4</sup> [bussejw@mcmaster.ca](mailto:bussejw@mcmaster.ca)  
9  
10 Samantha Craigie, <sup>2</sup> [sraigie@mcmaster.ca](mailto:sraigie@mcmaster.ca)  
11  
12 Behnam Sadeghirad, <sup>2,3</sup> [sadeghb@mcmaster.ca](mailto:sadeghb@mcmaster.ca)  
13  
14 Rachel Couban, <sup>3</sup> [rcouban@mcmaster.ca](mailto:rcouban@mcmaster.ca)  
15  
16 Patrick J Hong, <sup>5</sup> [jhong030@uottawa.ca](mailto:jhong030@uottawa.ca)  
17  
18 Yvgeniy Oparin, <sup>6</sup> [opariny@mcmaster.ca](mailto:opariny@mcmaster.ca)  
19  
20 Curtis May, <sup>7</sup> [c\\_may@shaw.ca](mailto:c_may@shaw.ca)  
21  
22 Annie Lok, <sup>3</sup> [lokaym@mcmaster.ca](mailto:lokaym@mcmaster.ca)  
23  
24 Gordon H. Guyatt, <sup>2</sup> [guyatt@mcmaster.ca](mailto:guyatt@mcmaster.ca)  
25  
26

27 <sup>1</sup> Department of Anesthesia, McMaster University, Hamilton, Ontario, Canada

28  
29 <sup>2</sup> Department of Health Research Methods, Evidence, and Impact, McMaster University,  
30 Hamilton, Ontario, Canada

31  
32 <sup>3</sup> Michael G. DeGroot Institute for Pain Research and Care, McMaster University, Hamilton,  
33 Ontario, Canada

34  
35 <sup>4</sup> The Michael G. DeGroot Centre for Medicinal Cannabis Research, McMaster University,  
36 Hamilton, Ontario, Canada

37  
38 <sup>5</sup> University of Ottawa, Faculty of Medicine, Ottawa, Ontario, Canada

39  
40 <sup>6</sup> Michael G. DeGroot School of Medicine, McMaster University, Hamilton, Ontario, Canada

41  
42 <sup>7</sup> School of Medicine, University of British Columbia, Vancouver, British Columbia, Canada  
43  
44  
45

46 **\*Corresponding Author:** Jason W. Busse, Department of Anesthesia, Michael G. DeGroot  
47 School of Medicine, McMaster University, HSC-2V9, 1280 Main St.  
48 West, Hamilton, Canada, L8S 4K1

49  
50 Tel: [905-525-9140](tel:905-525-9140) (x21731)

51  
52 Fax: [905-523-1224](tel:905-523-1224)

53  
54 Email: [bussejw@mcmaster.ca](mailto:bussejw@mcmaster.ca)  
55  
56  
57

1  
2  
3 **Word count: 3,024**  
4  
5  
6  
7  
8  
9  
10  
11  
12  
13  
14  
15  
16  
17  
18  
19  
20  
21  
22  
23  
24  
25  
26  
27  
28  
29  
30  
31  
32  
33  
34  
35  
36  
37  
38  
39  
40  
41  
42  
43  
44  
45  
46  
47  
48  
49  
50  
51  
52  
53  
54  
55  
56  
57  
58  
59  
60

For peer review only

## Abstract

**Introduction:** Acute, non-low back related musculoskeletal pain is common and associated with significant socioeconomic costs. No review has evaluated all interventional studies for acute musculoskeletal pain, which limits attempts to make inferences regarding the relative effectiveness of treatments.

**Methods and analysis:** We will conduct a systematic review of all randomised controlled trials evaluating therapies for acute musculoskeletal pain (excluding low back pain). We will identify eligible, English-language, trials by a systematic search of CINAHL, EMBASE, MEDLINE, PEDro and the Cochrane Central Registry of Controlled Trials from inception to February 2018. Eligible trials will: (1) enrol patients presenting with acute, non-low back related musculoskeletal pain (duration of pain  $\leq$  4 weeks), and (2) randomise patients to alternative interventions or an intervention and a placebo/sham arm. Fractures will be considered ineligible, unless they are non-surgical and therapy is directed at pain relief. Pairs of reviewers will, independently and in duplicate, screen titles and abstracts of identified citations, review the full texts of potentially eligible trials and extract information from eligible trials. We will use a modified Cochrane instrument to evaluate risk of bias. Disagreements will be resolved through discussion to achieve consensus.

We will use the GRADE system to evaluate the quality of evidence supporting treatment effects. When possible, we will conduct: (1) in direct comparisons, a random-effects meta-analysis to establish the effectiveness of therapeutic interventions on patient-important outcomes; and (2) multiple treatment comparison meta-analysis to assess the relative effects of treatments. We will use a priori hypotheses to explain heterogeneity between studies. We will use STATA 14.2 for all analyses.

1  
2  
3 **Ethics and dissemination:** No research ethics approval is required for this systematic review.  
4

5 The results of this systematic review will be disseminated through publication in a peer-reviewed  
6 journal, conference presentations, and will inform a clinical practice guideline.  
7  
8  
9

10  
11  
12 **Key Words:** acute pain; musculoskeletal; intervention; systematic review; network meta-  
13 analysis  
14  
15

16  
17  
18  
19 **PROSPERO registration number:** CRD42018094412  
20  
21  
22  
23  
24  
25  
26  
27  
28  
29  
30  
31  
32  
33  
34  
35  
36  
37  
38  
39  
40  
41  
42  
43  
44  
45  
46  
47  
48  
49  
50  
51  
52  
53  
54  
55  
56  
57  
58  
59  
60

## Article Summary

### Strengths and limitations

- Our broad study eligibility criteria will increase generalizability of our results.
- We will use the Grading of Recommendations Assessment, Development and Evaluation (GRADE) approach to evaluate our confidence in treatment effects.
- We will optimize interpretability by presenting risk differences and measures of relative effect for all outcomes reported, and by presenting our findings with GRADE evidence profiles.
- Findings from our review will inform a clinical practice guideline and identify key areas for future research.
- Our results will be limited by possible shortcomings of the primary studies.



## Introduction

Acute non-low back related musculoskeletal (MSK) pain, which include strains and sprains, dislocations, and whiplash present for less than 1 month<sup>1</sup>, are associated with considerable morbidity in North America. The Burden of Musculoskeletal Diseases in the United States, 3<sup>rd</sup> edition, found that sprains and strains are the most frequent injury type for which medical care is sought and the majority of MSK injuries occur among working-age adults.<sup>2</sup> In 2013 there were 2,807,880 emergency department visits for sports-related injuries in the US,<sup>3</sup> and over 70% of visits to the emergency department are because of pain-related complaints.<sup>4</sup> Management often yields suboptimal outcomes: a survey of 842 acute pain patients at 20 US and Canadian hospitals found 40% reported their pain did not change or increased after visiting the emergency department, and 74% of patients were discharged in moderate to severe pain.<sup>5</sup>

Despite the prevalence of acute MSK complaints in primary care, a number of studies have highlighted inadequate pain education of among physicians.<sup>6-8</sup> The availability of numerous pharmacologic and non-pharmacologic therapies further complicates management decisions. Currently available treatments include opioids, nonsteroidal anti-inflammatory drugs, muscle relaxants, acetaminophen, exercise, supervised rehabilitation, joint manipulation and mobilization, massage, acupuncture and acupressure, ultrasound, low-level laser therapy, and transcutaneous electrical nerve stimulation.<sup>9-12</sup>

A recently published series of 24 systematic reviews of treatment for common acute MSK injuries,<sup>13</sup> suffers from many important limitations, including: (1) selection bias due, in part, to exclusion of studies deemed to be at high risk of bias without empirically exploring if effect estimates differed from studies assigned low risk of bias, (2) interpreting results from individual studies as effective if the mean difference in a given outcome met the minimally

1  
2  
3 important difference (MID) and ineffective if not - an interpretation that relies on the unlikely  
4 assumption that all patients will experience the same degree of improvement, and fails to  
5 consider the distribution around the mean and the proportion of patients that achieve the MID,  
6  
7  
8  
9  
10 (3) no appraisal of the overall quality (confidence, certainty) of the evidence, and (4) no  
11 statistical pooling of treatment effects. We propose to conduct a systematic review of  
12  
13  
14 randomized trials to assess the comparative effectiveness of available non-surgical treatments for  
15  
16 acute MSK pain (excluding low back pain) and assess quality of evidence using the Grading of  
17  
18 Recommendations Assessment, Development and Evaluation (GRADE) methodology.  
19  
20  
21  
22  
23  
24  
25  
26  
27  
28  
29  
30  
31  
32  
33  
34  
35  
36  
37  
38  
39  
40  
41  
42  
43  
44  
45  
46  
47  
48  
49  
50  
51  
52  
53  
54  
55  
56  
57  
58  
59  
60

## Methods

### *Protocol registration*

The protocol for this systematic review is registered with PROSPERO (CRD42018094412). This review was commissioned by the American Academy of Family Physicians and American College of Physicians and sponsored by the National Safety Council.

### *Standardized Reporting*

We used the PRISMA-P checklist when writing our report.<sup>14</sup>

### *Information sources*

We will identify eligible, English language, randomized clinical trials (RCTs) through a systematic search of MEDLINE, EMBASE, CINAHL, PEDro and CENTRAL, from inception of each database through February 2018. Our search has been refined for individual databases by an experienced medical librarian (Appendix). We will scan reference lists of included studies and relevant systematic reviews for additional eligible articles.

### *Eligibility criteria and study selection*

We will include therapeutic trials that: 1) enroll adult patients ( $\geq 18$  years) presenting with acute, non-low back related MSK pain (pain with duration  $< 4$  weeks or defined by authors as “acute”) in an outpatient setting, and 2) randomise them to currently available, non-surgical, alternative interventions directed at pain relief (pharmacological or non-pharmacological) or a currently available, non-surgical, intervention directed at pain relief and a placebo/sham arm. Eligible MSK conditions include sprains and strains. Surgical fractures, non-surgical fractures unless

1  
2  
3 therapy is directed at pain relief, low back pain, neuropathic pain, acute cancer pain, acute  
4  
5 postoperative pain, acute dental pain, pain associated with labour and delivery, visceral pain,  
6  
7 pain due to infection, and headaches will be excluded. We will exclude interventions targeted at  
8  
9 treatment of acute low back pain on request by the study funder, as they have previously  
10  
11 commissioned evidence syntheses on this topic.<sup>9,10</sup>  
12  
13

14  
15 Ten teams of trained reviewers will work independently in pairs to screen titles and  
16  
17 abstracts of identified citations, using standardized, pilot-tested forms in DistillerSR, an online  
18  
19 systematic review software (Evidence Partners, Ottawa, Canada; <http://systematic-review.net/>).  
20  
21 The same teams of reviewers will screen full texts of any articles judged as potentially eligible.  
22  
23 Reviewers will discuss disagreements to come to consensus, referring to an adjudicator if  
24  
25 necessary. We will measure agreement between reviewers by calculating kappa ( $\kappa$ ) values to  
26  
27 assess the reliability of full-text review, and interpret them using the following thresholds: <0.20  
28  
29 as slight agreement, 0.21–0.40 as fair agreement, 0.41–0.60 as moderate agreement, 0.61–0.80 as  
30  
31 substantial agreement and >0.80 as almost perfect agreement.<sup>15</sup>  
32  
33  
34  
35  
36  
37

### 38 *Data abstraction*

39  
40 We designed standardized data abstraction forms and a detailed instruction video (accessible at:  
41  
42 <https://www.youtube.com/watch?v=1nwFJ61K3sQ>). We will conduct calibration exercises prior  
43  
44 to beginning data abstraction to ensure consistency and accuracy of extractions. Seven teams of  
45  
46 reviewers will extract data independently and in duplicate. We will extract the following data  
47  
48 from eligible trials into a standardized spreadsheet: study characteristics (e.g. the first author,  
49  
50 publication year, country of origin, and funding source), participant and trial characteristics (e.g.  
51  
52 sample size, mean age of participants, clinical condition, type and severity of injury, proportion  
53  
54  
55  
56  
57  
58  
59  
60

1  
2  
3 with known chronic pain/condition prior to acute injury, and the proportion receiving opioids at  
4 the time of enrollment), characteristics of interventions and comparators, patient-important  
5 outcomes (pain, function, health-related quality of life, patient satisfaction, return to work,  
6 proportion of patients with relief, re-injury and all reported adverse events). We will extract pain  
7 at any time-point, whereas for other outcomes, we will use the longest follow-up reported.<sup>16</sup>  
8  
9  
10  
11  
12  
13  
14  
15

### 16 *Risk of bias assessment*

17  
18 Among eligible studies, we will independently assess the following risk of bias issues: (1) random  
19 sequence generation, (2) allocation concealment, (3) blinding of study participants, personnel, and  
20 outcome assessors, (4) incomplete outcome data ( $\geq 20\%$  missing data will be considered at high  
21 risk of bias), and (5) other sources of bias.<sup>17</sup> To assess the risk of bias we will use a modified  
22 version of the Cochrane risk of bias instrument.<sup>18</sup> Our instrument will use the following responses:  
23 ‘definitely yes’ or ‘probably yes’ (considered as low risk of bias), or ‘definitely no’ or ‘probably  
24 no’ (considered as high risk of bias). These response options have published evidence of validity  
25 for assessing blinding.<sup>18</sup> Any discrepancy in assessment of risk of bias will be resolved by  
26 discussion, or third party adjudication if needed. We will contact authors for missing information  
27 regarding risk of bias issues and unpublished data (e.g. effect estimates without accompanying  
28 estimates of precision).  
29  
30  
31  
32  
33  
34  
35  
36  
37  
38  
39  
40  
41  
42  
43  
44  
45  
46

### 47 *Data synthesis*

48  
49 MSK complaints are increasingly being considered together as risk factors,<sup>19</sup> prognosis,<sup>20</sup> and  
50 treatments are often similar in guideline recommendations.<sup>21,22</sup> For the purposes of statistical  
51 pooling, we will explore treatment effects of interventions across all MSK complaints eligible for  
52  
53  
54  
55  
56  
57

1  
2  
3 this review; however, we will also explore if treatment effects differ by clinical condition or injury  
4 severity. Clustering strategies for clinical condition and injury severity will be informed by the  
5 trials eligible for our review, which will be reviewed by a technical expert panel, blinded to study  
6 results. Treatment effects will be pooled using the longest follow-up time reported, except for pain,  
7 which will be pooled at the most commonly reported short, medium and long-term follow-up times  
8 reported by trials eligible for our review. For our review, these categories will be 30 to 120 minutes  
9 post-treatment (short), 1 to 7 days post-treatment (medium), and 3 to 12 weeks post-treatment  
10 (long). As such, a single trial could contribute to up to 3 time-points for our pooled results for pain  
11 relief. Alternately, trials that reported pain relief at time points outside of these timeframes would  
12 not contribute data for our analyses of pain relief.  
13  
14  
15  
16  
17  
18  
19  
20  
21  
22  
23  
24  
25  
26  
27

### 28 *Methods for direct comparisons*

29  
30 We will pool dichotomous outcomes that are reported by >1 RCT and calculate the relative risk  
31 and risk difference (RD), using baseline risk estimates from the placebo arm of eligible studies,  
32 and the associated 95% confidence intervals (CIs). We will pool all continuous outcomes that are  
33 reported by >1 study and calculate the weighted mean differences (WMDs) and associated 95%  
34 CIs. We will employ methods described in Cochrane Handbook to estimate the mean and standard  
35 deviation (SD) when median, range, and sample size are reported, and to impute the SD if the  
36 standard error or SD for the differences are not reported.<sup>23</sup> For continuous outcomes, when studies  
37 report effect estimates using different measurement instruments that tap into a common construct  
38 (e.g. pain), we will first transform all outcomes to a common instrument on a domain-by-domain  
39 basis.<sup>24</sup> We will use change scores from baseline to end of follow-up rather than end-of-study  
40 scores, in order to account for inter-patient variability. If authors do not report change scores, we  
41  
42  
43  
44  
45  
46  
47  
48  
49  
50  
51  
52  
53  
54  
55  
56  
57  
58  
59  
60

1  
2  
3 will calculate them using the baseline and end-of-study score and a correlation coefficient derived  
4 from the largest trial at lowest risk of bias in the meta-analysis that does report a change score. We  
5  
6 will use DerSimonian–Laird random-effects models<sup>25</sup> for all pairwise comparisons.  
7  
8  
9

10 Interpreting effect estimates for continuous outcomes is challenging,<sup>26</sup> and we will present  
11 the minimally important difference (MID) for all pooled effect estimates. The MID is the smallest  
12 amount of improvement in a treatment outcome that a patient would recognize as important.<sup>27</sup> If  
13  
14 we find multiple MID estimates are available, we will use the smallest difference that has been  
15  
16 validated.  
17  
18  
19  
20

21 However, simply presenting the MID risks interpreting all mean effects that fall below the  
22 MID as unimportant, whereas we have found that, typically, mean differences of 1/2 the MID  
23 result in RDs of about 10% - a potential benefit that many patients may consider important.<sup>28</sup> Thus,  
24  
25 concluding that an effect is unimportant requires confidence that the mean difference is less than  
26  
27 1/2 the MID (and perhaps less). To optimize interpretability, we will calculate the RD of achieving  
28  
29 the MID for all statistically significant WMDs. Specifically, for each individual study, we will  
30  
31 assume that the SDs of outcome measurements are the same in both the treatment and control  
32  
33 groups, and that change scores in both groups are normally distributed. We will use the median or  
34  
35 mean, and SD of the control group, with the established MID for the outcome in question to  
36  
37 estimate the probability of achieving  $\geq$  MID in the control group. We will use the pooled mean  
38  
39 difference to estimate the mean in the treatment group and calculate the probability of achieving  
40  
41  $\geq$  MID in the treatment group. Finally, we will use risks in both groups to acquire the RD for  
42  
43 achieving  $\geq$  MID.  
44  
45  
46  
47  
48  
49  
50  
51  
52  
53

54 *Methods for network meta-analysis*  
55  
56  
57

1  
2  
3 We will perform network meta-analysis to synthesize the available evidence from the entire  
4 network of trials by integrating direct and indirect estimates for each comparison into a single  
5 summary treatment effect. We will use a frequentist random-effects model using the methodology  
6 of multivariable meta-analysis to assess the comparative effectiveness of eligible interventions.<sup>29,30</sup>  
7  
8  
9

10  
11  
12 Although the assumptions for network meta-analysis are similar to conventional meta-  
13 analysis, key extra assumptions are transitivity (there are no effect modifiers influencing the  
14 indirect comparisons) and coherence (direct and indirect effect estimates being similar).<sup>31</sup> We will  
15 identify issues of incoherence by comparing direct evidence (i.e. estimates from pairwise  
16 comparisons) with indirect evidence (i.e. estimates from network meta-analysis) using the node  
17 splitting method.<sup>32,33</sup> In this approach, incoherence is assessed locally by evaluating the  
18 consistency assumption in each closed loop of the network separately as the difference between  
19 direct and indirect estimates for a specific comparison in the loop. We will assume a common  
20 heterogeneity estimate within each loop. We will also confirm the coherence assumption in the  
21 entire network using a ‘design-by-treatment’ model.<sup>34</sup> In case we find significant incoherence in  
22 the network (highly significant p value from design-by-treatment model), we will perform network  
23 meta-analysis using an inconsistency model. If using an inconsistency model results in non-  
24 sensical results, we will explore the network for the source(s) of incoherence and further expand  
25 (disintegrating interventions based on differences in population or intervention characteristics) or  
26 exclude the node(s) introducing incoherence into the network (e.g., excluding node(s) with less  
27 than 20 events for binary outcomes or comparisons with only one trial with very few participants  
28 for continuous outcomes).  
29  
30  
31  
32  
33  
34  
35  
36  
37  
38  
39  
40  
41  
42  
43  
44  
45  
46  
47  
48  
49  
50

51 We will report our findings with probability statements of intervention effects. Probability  
52 rankings allow us to report a chance percentage of which interventions rank higher;<sup>35</sup> however,  
53  
54  
55  
56  
57  
58  
59  
60



1  
2  
3 simplifying the results of a network down to probabilities can lead to misinterpretations,  
4 specifically, when particular comparisons (i.e. nodes) are not well-connected or when the quality  
5 of evidence varies between comparisons.<sup>36,37</sup> Following display of the rank probabilities using  
6 rankogram, we will use the surface under the cumulative ranking (SUCRA) line to aid in  
7 interpretation of relative effect of the interventions. An intervention with a SUCRA value of 100  
8 is certain to be the most effective, whereas an intervention with 0 is certain to be the least  
9 effective.<sup>35</sup> We will use STATA (StataCorp, Release 14.2, College Station, Texas, USA) for all  
10 statistical analyses. All comparisons will be 2-tailed using a threshold  $p \leq 0.05$ .  
11  
12  
13  
14  
15  
16  
17  
18  
19  
20  
21  
22  
23

#### 24 *Subgroup analyses, meta-regression and sensitivity analysis*

25  
26 We will use Cochran's Q statistic and  $I^2$  to determine statistical heterogeneity for direct meta-  
27 analysis.<sup>32</sup> We have developed five hypotheses to explain heterogeneity between trials: (1)  
28 different clinical conditions will show different treatment effects; (2) more severe injuries will  
29 show smaller treatment effects than less severe injuries (e.g. higher grades of strains and sprains  
30 vs. lower grades); (3) older patients will show smaller treatment effects than younger patients; (4)  
31 longer follow-up will show smaller treatment effects than shorter follow-up; and (5) higher  
32 dose/intensity of treatment will show larger treatment effects. We will perform subgroup analyses  
33 regardless of heterogeneity estimates, if there are at least 2 trials in each subgroup. Moreover, we  
34 will explore the effect of risk of bias (on a component-by-component basis) and reported vs.  
35 converted change scores on treatment effects.  
36  
37  
38  
39  
40  
41  
42  
43  
44  
45  
46  
47  
48  
49  
50

#### 51 *Assessing quality of the evidence*

1  
2  
3 We will use the GRADE approach to assess the quality of evidence on an outcome-by-outcome  
4 basis. The starting point for quality of evidence for RCTs is high, but may be rated down based on  
5 limitations in risk of bias, imprecision, inconsistency, and indirectness and publication bias.<sup>38</sup>  
6  
7 When there are at least 10 studies for meta-analysis,<sup>39,40</sup> we will assess publication bias by visual  
8 assessment of asymmetry of the funnel plot and calculated Begg's test.  
9  
10  
11  
12  
13

14 We will also use the GRADE approach to assess quality of evidence for indirect and  
15 network (mixed) effect estimates.<sup>41,42</sup> Indirect effect estimates are calculated from available  
16 'loops' of evidence, which includes first order loops (based on a single common comparator  
17 treatment, the difference between the treatment A and B is based on comparisons of A and C as  
18 well as B and C) or higher order loops (more than one intervening treatment connecting the two  
19 interventions). We will visually examine the network map and where first order loops are  
20 available for indirect comparisons, the quality of evidence will be the lower of the ratings for the  
21 two direct estimates contributing to the first order loop. In the absence of a first order loop, a  
22 higher order loop will be used to rate the quality of evidence. We may rate down quality of  
23 evidence further for intransitivity.<sup>42</sup> The transitivity assumption implies similarity of trials in  
24 terms of population, intervention, settings, and trial methodology.<sup>43</sup>  
25  
26  
27  
28  
29  
30  
31  
32  
33  
34  
35  
36  
37  
38  
39

40 It is very rare for a network meta-analysis to establish a single treatment option as clearly  
41 superior to all others. We will categorize interventions according to three categories: (1) those  
42 that are clearly superior, (2) those with intermediate effectiveness, and (3) those that are inferior.  
43  
44 Treatments no better than placebo will be in the lowest tier, those better than placebo in tier 1  
45 (likely intermediate); those superior to at least 1 tier 1 treatment will be judged superior.  
46  
47 Treatments will be further categorized according to quality of evidence supporting those  
48 estimates (high and moderate vs. low or very low). Interventions with moderate or high quality  
49  
50  
51  
52  
53  
54  
55  
56  
57  
58  
59  
60

1  
2  
3 evidence will be ranked as either ‘among the most effective’, ‘inferior to the most effective /  
4 superior to the least effective’, or ‘among the least effective’. Interventions supported by low or  
5 very low quality evidence will be ranked into the same 3 categories but prefaced with ‘may be’  
6 to acknowledge the reduced confidence in supporting evidence (e.g. ‘may be among the most  
7 effective’) and will be presented separately from those supported by moderate or high quality  
8 evidence.  
9  
10  
11  
12  
13  
14  
15  
16  
17  
18

### 19 **Ethics and Dissemination**

20  
21 No research ethics approval is required for this systematic review, as no confidential patient data  
22 will be used. The results of this systematic review will be disseminated through publication in a  
23 peer-reviewed journal and through conference presentations. Findings from our review will  
24 inform a clinical practice guideline. All amendments to the protocol will be reported in the  
25 PROSPERO trial registry.  
26  
27  
28  
29  
30  
31  
32  
33  
34

### 35 **Patient and Public Involvement**

36  
37 No patients were involved in setting the research question, in developing plans for design,  
38 interpretation, reporting or implementation of the study. We plan to disseminate the results of  
39 this study to organisations supporting patients with acute MSK pain.  
40  
41  
42  
43  
44  
45  
46  
47  
48  
49  
50  
51  
52  
53  
54  
55  
56  
57  
58  
59  
60

## Discussion

With the high prevalence of acute non-low back MSK pain, the associated socioeconomic burden and the paucity of evidence on the comparative effectiveness of treatment options, there is an urgent need for a high-quality systematic review to inform evidence-based management of these complaints.

Our proposed review has several strengths in relation to existing reviews. First, we will explore all currently available non-pharmacological and pharmacological treatment options for all acute MSK complaints (excluding low back pain) reported among eligible trials. It is plausible that individual acute MSK complaints respond similarly to similar interventions, and thus by pooling across individual injuries, it may be possible to provide a more precise estimate of treatment effect. Second, we will update the search to present date. Third, we will use the GRADE approach to evaluate the quality of evidence supporting treatment effects. Fourth, we will ensure interpretability by presenting RDs and measures of relative effect for all outcomes reported, and by presenting our findings with GRADE evidence profiles.

A potential limitation will be the nature of available treatment comparisons to build robust networks for our analyses. The findings of our review will help inform patients with acute non-low back related MSK pain about their therapeutic options, identify key areas for research, and facilitate a clinical practice guideline for the management of acute, non-low back related MSK pain.

1  
2  
3 **Acknowledgements:** We thanks the members of our Technical Expert Panel for assistance in  
4 developing our study protocol: Robert McLean, MD; Devan Kansagara, MD; Dave O'Gurek,  
5 MD; Kenny Lin, MD; Christina Mikosz, MD; John Riva, DC, MSc; Moin Khan, MD.  
6  
7  
8  
9  
10

11  
12 **Author Contributions:** All authors made substantial contributions to conception and design.  
13  
14 JWB and BS drafted the article, and SC, RC, PJH, YO, CM, AL and GHG revised it critically for  
15 important intellectual content. All authors provided final approval of the version to be published.  
16  
17 JWB is the guarantor of the review protocol.  
18  
19  
20  
21  
22

23  
24 **Data sharing:** Statistical code and dataset available from Dr. Sadeghirad (e-mail:  
25 b.sadeghirad@gmail.com).  
26  
27  
28  
29  
30

31 **Funding:** This study is a sponsor-initiated review, supported by a grant from the National Safety  
32 Council (NSC) (PI: JW Busse). The NSC partnered with the American Academy of Family  
33 Physicians (AAFP) and the American College of Physicians (ACP) who helped to inform the  
34 design of our review, but the NSC will have no role in the conduct of the study; collection,  
35 management, analysis, and interpretation of the data; preparation, review, or approval of the  
36 resulting manuscript; or decision to submit the manuscript for publication. Representatives from  
37 AAFP and ACP will have the right to review the manuscript and make non-binding comments  
38 and suggestions.  
39  
40  
41  
42  
43  
44  
45  
46  
47  
48  
49  
50

51 **Competing interests:** None declared.  
52  
53  
54  
55  
56  
57  
58  
59  
60

1  
2  
3 **Patient consent:** Not required.  
4  
5  
6  
7

8 **Provenance and peer review:** This review was commissioned and externally peer reviewed.  
9  
10

11  
12 **Open Access:** This is an Open Access article distributed in accordance with the terms of the  
13  
14 Creative Commons Attribution (CC BY 4.0) license, which permits others to distribute, remix,  
15  
16 adapt and build upon this work, for commercial use, provided the original work is properly cited.  
17  
18

19 See: <http://creativecommons.org/licenses/by/4.0/>  
20  
21  
22  
23  
24  
25  
26  
27  
28  
29  
30  
31  
32  
33  
34  
35  
36  
37  
38  
39  
40  
41  
42  
43  
44  
45  
46  
47  
48  
49  
50  
51  
52  
53  
54  
55  
56  
57  
58  
59  
60

## References

1. Olsen MF, Bjerre E, Hansen MD, et al. Pain relief that matters to patients: systematic review of empirical studies assessing the minimum clinically important difference in acute pain. *BMC medicine* 2017;15(1):35. doi: 10.1186/s12916-016-0775-3 [published Online First: 2017/02/22]
2. United States Bone and Joint Initiative: The Burden of Musculoskeletal Diseases in the United States (BMUS) Rosemont, IL. 2014. Third Edition [Available from: <http://www.boneandjointburden.org> accessed March 3rd 2017.
3. Agency for Healthcare Research and Quality (AHRQ), Center for Delivery Organization and Markets Healthcare Cost and Utilization Project (HCUP). National Inpatient Sample (NIS) and Nationwide Emergency Department Sample (NEDS), 2013.
4. Todd KH, Miner JR. Pain in the emergency room. In: Fishman SM, Ballantyne JC, Rathmell JP, eds. *Bonica's Management of Pain*. Philadelphia, PA, USA: Lippincott, Williams and Wilkins 2010:1576–87.
5. Todd KH, Ducharme J, Choiniere M, et al. Pain in the emergency department: results of the pain and emergency medicine initiative (PEMI) multicenter study. *The journal of pain : official journal of the American Pain Society* 2007;8(6):460-6. doi: 10.1016/j.jpain.2006.12.005 [published Online First: 2007/02/20]
6. Vadivelu N, Mitra S, Hines R, et al. Acute pain in undergraduate medical education: an unfinished chapter! *Pain practice : the official journal of World Institute of Pain* 2012;12(8):663-71. doi: 10.1111/j.1533-2500.2012.00580.x [published Online First: 2012/06/21]

- 1  
2  
3 7. Fishman SM, Young HM, Lucas Arwood E, et al. Core competencies for pain management:  
4  
5 results of an interprofessional consensus summit. *Pain medicine (Malden, Mass)*  
6  
7 2013;14(7):971-81. doi: 10.1111/pme.12107 [published Online First: 2013/04/13]  
8  
9
- 10 8. Watt-Watson J, Murinson BB. Current challenges in pain education. *Pain management*  
11  
12 2013;3(5):351-7. doi: 10.2217/pmt.13.39 [published Online First: 2014/03/25]  
13  
14
- 15 9. Chou R, Deyo R, Friedly J, et al. Nonpharmacologic Therapies for Low Back Pain: A  
16  
17 Systematic Review for an American College of Physicians Clinical Practice Guideline.  
18  
19 *Ann Intern Med* 2017;166(7):493-505. doi: 10.7326/m16-2459 [published Online First:  
20  
21 2017/02/14]  
22  
23
- 24 10. Chou R, Deyo R, Friedly J, et al. Systemic Pharmacologic Therapies for Low Back Pain: A  
25  
26 Systematic Review for an American College of Physicians Clinical Practice Guideline.  
27  
28 *Ann Intern Med* 2017;166(7):480-92. doi: 10.7326/m16-2458 [published Online First:  
29  
30 2017/02/14]  
31  
32
- 33 11. Qaseem A, Wilt TJ, McLean RM, Forciea MA; Clinical Guidelines Committee of the  
34  
35 American College of Physicians. Noninvasive Treatments for Acute, Subacute, and  
36  
37 Chronic Low Back Pain: A Clinical Practice Guideline from the American College of  
38  
39 Physicians. *Ann Intern Med.* 2017; 166(7): 514-530.  
40  
41
- 42 12. Motov S, Strayer R, Hayes BD, Reiter M, Rosenbaum S, Richman M, Repanshek Z, Taylor  
43  
44 S, Friedman B, Vilke G, Lasoff D. The Treatment of Acute Pain in the Emergency  
45  
46 Department: A White Paper Position Statement Prepared for the American Academy of  
47  
48 Emergency Medicine. *J Emerg Med.* 2018; 54(5): 731-736.  
49  
50  
51  
52  
53  
54  
55  
56  
57



- 1  
2  
3 13. Côté P, Shearer H, Ameis A, et al. Enabling recovery from common traffic injuries: A focus  
4  
5 on the injured person. January 31, 2015; UOIT-CMCC Centre for the Study of Disability  
6  
7 Prevention and Rehabilitation.  
8  
9
- 10 14. Moher D, Shamseer L, Clarke M, et al. Preferred reporting items for systematic review and  
11  
12 meta-analysis protocols (PRISMA-P) 2015 statement. *Systematic reviews* 2015;4:1. doi:  
13  
14 10.1186/2046-4053-4-1 [published Online First: 2015/01/03]  
15  
16
- 17 15. Landis JR, Koch GG. The measurement of observer agreement for categorical data.  
18  
19 *Biometrics* 1977;33(1):159-74. [published Online First: 1977/03/01]  
20  
21
- 22 16. Tendal B, Nuesch E, Higgins JP, et al. Multiplicity of data in trial reports and the reliability  
23  
24 of meta-analyses: empirical study. *Bmj* 2011;343:d4829. doi: 10.1136/bmj.d4829  
25  
26 [published Online First: 2011/09/01]  
27
- 28 17. Higgins JPT, Altman DG, Gøtzsche PC, et al. The Cochrane Collaboration's tool for  
29  
30 assessing risk of bias in randomised trials. *BMJ* 2011;343:d5928. doi:  
31  
32 <http://dx.doi.org/10.1136/bmj.d5928>  
33  
34
- 35 18. Akl EA, Sun X, Busse JW, et al. Specific instructions for estimating unclearly reported  
36  
37 blinding status in randomized trials were reliable and valid. *J Clin Epidemiol*  
38  
39 2012;65(3):262-67. doi: <http://dx.doi.org/10.1016/j.jclinepi.2011.04.015>  
40  
41
- 42 19. Taanila H, Suni JH, Kannus P, et al. Risk factors of acute and overuse musculoskeletal  
43  
44 injuries among young conscripts: a population-based cohort study. *BMC musculoskeletal*  
45  
46 *disorders* 2015;16:104. doi: 10.1186/s12891-015-0557-7 [published Online First:  
47  
48 2015/05/01]  
49  
50
- 51 20. de Vos Andersen NB, Kent P, Hjort J, et al. Clinical course and prognosis of musculoskeletal  
52  
53 pain in patients referred for physiotherapy: does pain site matter? *BMC musculoskeletal*  
54  
55

- 1  
2  
3 *disorders* 2017;18(1):130. doi: 10.1186/s12891-017-1487-3 [published Online First:  
4  
5 2017/03/31]  
6  
7
- 8 21. Australian Acute Musculoskeletal Pain Guidelines Group. Evidence-based management of  
9  
10 acute musculoskeletal pain. *ISBN 1 875378 49 9* 2003  
11
- 12 22. Babatunde OO, Jordan JL, Van der Windt DA, et al. Effective treatment options for  
13  
14 musculoskeletal pain in primary care: A systematic overview of current evidence. *PLoS*  
15  
16 *One* 2017;12(6):e0178621. doi: 10.1371/journal.pone.0178621 [published Online First:  
17  
18 2017/06/24]  
19  
20
- 21 23. Higgins JP, Green S. Cochrane Handbook for Systematic Reviews of Interventions, version  
22  
23 [5.1.0] (updated March 2011). The Cochrane Collaboration, 2011.  
24  
25
- 26 24. Thorlund K, Walter SD, Johnston BC, et al. Pooling health-related quality of life outcomes in  
27  
28 meta-analysis-a tutorial and review of methods for enhancing interpretability. *Res Synth*  
29  
30 *Methods* 2011;2(3):188-203. doi: 10.1002/jrsm.46 [published Online First: 2011/09/01]  
31  
32
- 33 25. DerSimonian R, Laird N. Meta-analysis in clinical trials. *Controlled clinical trials*  
34  
35 1986;7(3):177-88.  
36  
37
- 38 26. Busse JW, Bartlett SJ, Dougados M, et al. Optimal Strategies for Reporting Pain in Clinical  
39  
40 Trials and Systematic Reviews: Recommendations from an OMERACT 12 Workshop.  
41  
42 *The Journal of rheumatology* 2015;42(10):1962-70. doi: 10.3899/jrheum.141440  
43  
44 [published Online First: 2015/05/17]  
45  
46
- 47 27. Schunemann HJ, Guyatt GH. Commentary--goodbye M(C)ID! Hello MID, where do you  
48  
49 come from? *Health services research* 2005;40(2):593-7. doi: 10.1111/j.1475-  
50  
51 6773.2005.00374.x [published Online First: 2005/03/15]  
52  
53  
54  
55  
56  
57  
58  
59  
60

- 1  
2  
3 28. Busse JW, Wang L, Kamaleldin M, et al. Opioids for Chronic Noncancer Pain: A Systematic  
4  
5 Review and Meta-analysis. *JAMA*. 2018; 320(23): 2448-2460.  
6  
7  
8 29. White IR. Network meta-analysis. *The Stata Journal* 2015;15(4):951–85.  
9  
10 30. White IR, Barrett JK, Jackson D, et al. Consistency and inconsistency in network meta-  
11  
12 analysis: model estimation using multivariate meta-regression. *Res Synth Methods*  
13  
14 2012;3(2):111-25. doi: 10.1002/jrsm.1045 [published Online First: 2012/06/01]  
15  
16  
17 31. Donegan S, Williamson P, D'Alessandro U, et al. Assessing key assumptions of network  
18  
19 meta-analysis: a review of methods. *Res Synth Methods* 2013;4(4):291-323. doi:  
20  
21 10.1002/jrsm.1085  
22  
23  
24 32. Higgins JPT, Thompson SG, Deeks JJ, et al. Measuring inconsistency in meta-analyses. *BMJ*  
25  
26 2003;327(7414):557-60. doi: <http://dx.doi.org/10.1136/bmj.327.7414.557>  
27  
28  
29 33. Lu G, Ades AE. Assessing evidence inconsistency in mixed treatment comparisons. *J Am*  
30  
31 *Stat Assoc* 2006;101(474):447-59. doi: 10.1198/016214505000001302  
32  
33 34. Higgins JP, Jackson D, Barrett JK, et al. Consistency and inconsistency in network meta-  
34  
35 analysis: concepts and models for multi-arm studies. *Res Synth Methods* 2012;3(2):98-  
36  
37 110. doi: 10.1002/jrsm.1044 [published Online First: 2012/06/01]  
38  
39  
40 35. Salanti G, Ades AE, Ioannidis JPA. Graphical methods and numerical summaries for  
41  
42 presenting results from multiple-treatment meta-analysis: an overview and tutorial. *J Clin*  
43  
44 *Epidemiol* 2011;64(2):163-71. doi: <http://dx.doi.org/10.1016/j.jclinepi.2010.03.016>  
45  
46  
47 36. Mbuagbaw L, Rochwerg B, Jaeschke R, et al. Approaches to interpreting and choosing the  
48  
49 best treatments in network meta-analyses. *Systematic reviews* 2017;6(1):79. doi:  
50  
51 10.1186/s13643-017-0473-z [published Online First: 2017/04/14]  
52  
53  
54  
55  
56  
57  
58  
59  
60

- 1  
2  
3 37. Trinquart L, Attiche N, Bafeta A, et al. Uncertainty in Treatment Rankings: Reanalysis of  
4  
5 Network Meta-analyses of Randomized Trials. *Ann Intern Med* 2016;164(10):666-73.  
6  
7 doi: 10.7326/m15-2521 [published Online First: 2016/04/19]  
8  
9  
10 38. Guyatt GH, Oxman AD, Vist GE, et al. GRADE: an emerging consensus on rating quality of  
11  
12 evidence and strength of recommendations. *BMJ* 2008;336(7650):924-26. doi:  
13  
14 10.1136/bmj.39489.470347.AD  
15  
16 39. Higgins JPT, Green S. Cochrane Handbook for Systematic Reviews of Interventions Version  
17  
18 5.1.0 [updated March 2011]. 2011; Available from <http://handbook-5-1.cochrane.org/>  
19  
20 (Accessed October 25, 2018)  
21  
22  
23 40. Begg CB, Mazumdar M. Operating characteristics of a rank correlation test for publication  
24  
25 bias. *Biometrics* 1994;50(4):1088-101. [published Online First: 1994/12/01]  
26  
27  
28 41. Puhan MA, Schünemann HJ, Murad MH, et al. A GRADE Working Group approach for  
29  
30 rating the quality of treatment effect estimates from network meta-analysis. *BMJ*  
31  
32 2014;349:5630. doi: 10.1136/bmj.g5630  
33  
34  
35 42. Brignardello-Petersen R, Bonner A, Alexander PE, et al. Advances in the GRADE approach  
36  
37 to rate the certainty in estimates from a network meta-analysis. *Journal of clinical*  
38  
39 *epidemiology* 2018;93:36-44. doi: 10.1016/j.jclinepi.2017.10.005 [published Online First:  
40  
41 2017/10/21]  
42  
43  
44 43. Salanti G, Higgins JP, Ades A, et al. Evaluation of networks of randomized trials. *Stat*  
45  
46 *Methods Med Res* 2008;17(3):279-301.  
47  
48  
49  
50  
51  
52  
53  
54  
55  
56  
57  
58  
59  
60

## Appendix: Literature Search Strategies

Summary of search and strategies ACP Acute MSK Pain

Feb 14, 2018

Database: OVID Medline Epub Ahead of Print, In-Process & Other Non-Indexed Citations, Ovid MEDLINE(R) Daily and Ovid MEDLINE(R) 1946 to Present

Search Strategy:

-----

1 exp arm injuries/ or athletic injuries/ or exp joint dislocations/ or exp fractures, bone/ or fractures, cartilage/ or exp hand injuries/ or exp hip injuries/ or exp leg injuries/ or exp neck injuries/ or occupational injuries/ or exp shoulder injuries/ or exp soft tissue injuries/ or exp "sprains and strains"/ or exp tendon injuries/ or exp Compartment Syndromes/ or exp Bone Malalignment/ (300813)

2 (exp Musculoskeletal system/ or musculoskeletal diseases/ or osteitis/ or exp cartilage diseases/ or exp fasciitis/ or exp bursitis/ or exp metatarsalgia/ or exp synovitis/ or muscle cramp/ or myalgia/ or exp tendinopathy/) and pain\*.ti,ab. (87772)

3 Musculoskeletal Pain/ or Neck Pain/ or Acute Pain/ or exp Arthralgia/ (19422)

4 (Arthralgi\* or bursitis or capsulit\* or epicondylalgia\* or epicondylit\* or fasciopath\* or fasciitis or fascitis or metatarsalgi\* or myalgi\* or myelitis or myopath\* or myosit\* or osteitis or osteochondritis or osteomyelitis or polymyositis\* or radiculopath\* or radiculit\* or synovit\* or tend?nopath\* or tendinit\* or tenosynovit\* or whiplash or WAD).tw. (111653)

5 ((ligament or tendon or supraspinatus or infraspinatus or subscapularis or teres minor or teres major or trapezius or deltoid or bicep\* or bicipital or coracobrachialis or deltoid or fibularis or talofibular or calcaneofibular or calcaneotibial or tibio\* or rotator cuff) adj3 (injur\* or impair\* or imping\* or sprain\* or strain\* or tear or torn)).tw. (14400)

6 ((myofascial or neck\* or cervical\* or musculoskeletal\* or MSK or elbow\* or arm\* or finger\* or hand\* or wrist\* or forearm\* or leg or ankle\* or knee\* or hip\* or foot\* or toe\* or femur\* or radius or radii or tibia\* or ulna\* or humerus or humeri or metatarsal\* or metacarpal\* or fibula\* or patella\* or patellofemoral or carpal\* or tarsal\* or phalange\* or clavicle\* or scapula\* or bone\* or joint\* or muscle\* or shoulder\*) adj3 (sprain\* or strain\* or injur\* or impair\* or fractur\* or break\* or broken or disorder\* or pain\*)).tw. (235481)

7 or/1-6 (587971)

8 randomized controlled trial.pt. or randomi?ed.mp. or placebo.mp. (810530)

9 ((treatment or control) adj3 group\*).ab. (511607)

10 (allocat\* adj5 group\*).ab. (20402)

11 ((clinical or control\*) adj3 trial).ti,ab,kw. (226548)

12 or/8-11 (1258485)

13 7 and 12 (46565)

14 exp animals/ not humans.sh. (4424690)

15 13 not 14 (42705)

16 adult.mp. or middle aged.sh. or age:.tw. (8090446)

17 15 and 16 (30798)

18 limit 15 to "all adult (19 plus years)" (28434)

19 17 or 18 (31999)

20 treatment outcome/ (824861)

21 Pain Measurement/ (75370)

- 1  
2  
3 22 "Recovery of Function"/ (42703)  
4 23 ((disability or function\* or recover\* or pain\* or analog\*) adj3 (measur\* or evaluat\* or  
5 scale or status or test\* or assess\* or rating\* or index or questionnaire)).mp. (586581)  
6 24 (VAS or "visual analog\*" or "numeric\* rating scale" or "point scale" or comfort\* or  
7 "Disabilities of the Arm Shoulder and Hand" or DASH or "Shoulder Pain and Disability Index"  
8 or SPDI or "mcgill pain" or BPI or "brief pain" or improvement).mp. (628803)  
9 25 Return to Work/ or Return to Sport/ or ((return or resump\*) adj3 (work or sport or play or  
10 activit\*)).mp. (16520)  
11 26 pain\*.jw,ti. (199639)  
12 27 pain\*.ab. /freq=2 (243208)  
13 28 or/20-27 (2035376)  
14 29 19 and 28 (20709)  
15 30 exp appendicitis/ or exp Back Pain/ or Labor Pain/ or exp Pain, Postoperative/ or exp  
16 Toothache/ or headache/ or exp Headache disorders/ or exp dentistry/ or exp Neoplasms/  
17 (3499077)  
18 31 (pain\* adj3 (chronic or dental or labo?r or back or low back or spine or spinal or lumbar or  
19 sciatic\* or cancer\*)).mp. (118740)  
20 32 (sciatica or backache or dorsalgia or lumbago or toothache or migraine or appendicitis or  
21 metastas\*).mp. (463484)  
22 33 or/30-32 (3631063)  
23 34 29 not 33 (13769)  
24 35 (clinic\* or practi\* or primary or physician\* or refer\* or visit\* or outpatient\* or consult\* or  
25 family or communit\* or ambulatory or centre\* or center\* or office or sport\*).ti,ab. (7012189)  
26 36 34 and 35 (9481)  
27 37 Osteoarthritis/ (33247)  
28 38 exp arthroplasty/ or exp arthroscopy/ or bone transplantation/ (101224)  
29 39 su.fs. (1807708)  
30 40 or/37-39 (1863671)  
31  
32  
33  
34  
35

36 Feb 14, 2018

37 Database: Embase <1974 to 2018 February 13>

38 Search Strategy:  
39  
40

41 1 limb injury/ or exp arm injury/ or exp leg injury/ or exp limb fracture/ or sport injury/ or exp  
42 joint injury/ or musculoskeletal injury/ or exp cartilage injury/ or exp "ligament and tendon  
43 injury"/ or medial tibial stress syndrome/ or muscle injury/ or overexertion/ or exp sprain/ or  
44 fracture/ or avulsion fracture/ or clavicle fracture/ or comminuted fracture/ or fracture  
45 dislocation/ or exp fracture healing/ or intraarticular fracture/ or exp joint fracture/ or exp limb  
46 fracture/ or exp multiple fracture/ or exp scapula fracture/ or stress fracture/ or neck injury/ or  
47 whiplash injury/ or occupational accident/ or soft tissue injury/ or compartment syndrome/  
48 (382802)  
49

50 Annotation: includes arm injury/ or exp arm fracture/ or elbow dislocation/ or elbow injury/ or  
51 exp forearm injury/ or exp hand injury/ or exp shoulder injury/ or exp wrist injury/ or leg injury/  
52 or exp ankle injury/ or exp foot injury/ or exp hip injury/ or exp knee injury/ or exp leg fracture/  
53 or tibia torsion/ or exp ankle injury/ or exp dislocation/ or exp hip injury/ or intraarticular  
54  
55  
56  
57  
58  
59  
60

1  
2  
3 fracture/ or exp joint fracture/ or exp knee injury/ or posttraumatic arthropathy/ or exp wrist  
4 injury/

5 2 (exp musculoskeletal system/ or exp musculoskeletal disease/) and pain\*.ti,ab. (312623)

6 3 musculoskeletal pain/ or neck pain/ or shoulder pain/ or arthralgia/ (86878)

7 4 or/1-3 (692780)

8 Annotation: emtree terms condition MSK pain

9 5 (Arthralgi\* or bursitis or capsulit\* or epicondylgia\* or epicondylit\* or fasciopath\* or  
10 fasciitis or fascitis or metatarsalgi\* or myalgi\* or myelitis or myopath\* or myositis\* or osteitis or  
11 osteochondritis or osteomyelitis or polymyositis\* or radiculopath\* or radiculit\* or synovit\* or  
12 tend?nopath\* or tendinit\* or tenosynovit\* or whiplash or WAD).tw. (147804)

13 6 ((ligament or tendon or supraspinatus or infraspinatus or subscapularis or teres minor or  
14 teres major or trapezius or deltoid or bicep\* or bicipital or coracobrachialis or deltoid or fibularis  
15 or talofibular or calcaneofibular or calcaneotibial or tibio\* or rotator cuff) adj3 (injur\* or impair\*  
16 or imping\* or sprain\* or strain\* or tear or torn)).tw. (16617)

17 7 ((myofascial or neck\* or cervical\* or musculoskeletal\* or MSK or elbow\* or arm\* or  
18 finger\* or hand\* or wrist\* or forearm\* or leg or ankle\* or knee\* or hip\* or foot\* or toe\* or  
19 femur\* or radius or radii or tibia\* or ulna\* or humerus or humeri or metatarsal\* or metacarpal\*  
20 or fibula\* or patella\* or patellofemoral or carpal\* or tarsal\* or phalange\* or clavicle\* or  
21 scapula\* or bone\* or joint\* or muscle\* or shoulder\*) adj3 (sprain\* or strain\* or injur\* or impair\*  
22 or fractur\* or break\* or broken or disorder\* or pain\*).tw. (305948)

23 8 or/5-7 (444822)

24 Annotation: free text terms condition MSK pain

25 9 4 or 8 (897318)

26 Annotation: MSK pain

27 10 exp animals/ or exp invertebrate/ or animal experiment/ or animal model/ or animal tissue/  
28 or animal cell/ or nonhuman/ (25540585)

29 11 human/ or normal human/ or human cell/ (19287963)

30 12 10 and 11 (19240053)

31 13 10 not 12 (6300532)

32 14 9 not 13 (837728)

33 15 random:.tw. or placebo:.mp. or double-blind:.tw. (1509046)

34 Annotation: HIRU specific RCT filter

35 16 ((treatment or control) adj3 group\*).ab. (723604)

36 17 (allocat\* adj5 group\*).ab. (26448)

37 18 ((clinical or control\*) adj3 trial).ti,ab,kw. (327340)

38 19 or/15-18 (2107446)

39 Annotation: modified RCT filter

40 20 14 and 19 (95790)

41 Annotation: MSK pain with mod RCT filter

42 21 treatment outcome/ (762155)

43 22 outcome assessment/ (400641)

44 23 pain measurement/ (4687)

45 24 exp pain assessment/ (134012)

46 25 convalescence/ (42381)

47 26 return to sport/ or return to work/ (4870)

48 27 work resumption/ (3467)

1  
2  
3 28 ((disability or function\* or recover\* or pain\* or analog\*) adj3 (measur\* or evaluat\* or  
4 scale or status or test\* or assess\* or rating\* or index or questionnaire)).mp. (790797)  
5 29 (VAS or "visual analog\*" or "numeric\* rating scale" or "point scale" or comfort\* or  
6 "Disabilities of the Arm Shoulder and Hand" or DASH or "Shoulder Pain and Disability Index"  
7 or SPDI or "mcgill pain" or BPI or "brief pain" or improvement).mp. (911685)  
8 30 ((return or resump\*) adj3 (work or sport or play or activit\*)).mp. (23514)  
9 31 pain\*.jw,ti. (269095)  
10 32 pain\*.ab. /freq=2 (358966)  
11 33 or/21-32 (2816037)  
12 34 20 and 33 (58373)

13  
14  
15 Annotation: MSK pain with mod RCT and outcome

16 35 exp appendicitis/ or exp backache/ or labor pain/ or exp postoperative complication/ or exp  
17 tooth disease/ or headache/ or exp dentistry/ or exp malignant neoplasm/ or exp metastasis/  
18 (4067682)

19 36 (pain\* adj3 (chronic or dental or labo?r or back or low back or spine or spinal or lumbar or  
20 sciatic\* or cancer\*)).mp. (189693)

21 37 (sciatica or backache or dorsalgia or lumbago or toothache or migraine or metastas\* or  
22 appendicitis).mp. (778837)

23 38 35 or 36 or 37 (4238484)

24 39 34 not 38 (30664)

25  
26 Annotation: mod RCT set

27 40 (clinic\* or practi\* or primary or physician\* or refer\* or visit\* or outpatient\* or consult\* or  
28 family or communit\* or ambulatory or centre\* or center\* or office or sport\*).ti,ab. (9180696)

29  
30 Annotation: Gill 2014 primary care plus sport

31 41 39 and 40 (21784)

32 42 exp osteoarthritis/ (110006)

33 43 bone transplantation/ or exp bone graft/ (46349)

34 44 exp orthopedic surgery/ (406039)

35  
36 Annotation: includes exp joint surgery/ or exp arthroplasty/

37 45 su.fs. (1950489)

38 46 or/42-45 (2224706)

39  
40 Cochrane Library

41 Search Name: 2017-08-22 ACP acute msk pain search

42 Date Run: 14/02/18 20:52:03.682

43 Description:

44  
45  
46 ID Search Hits

47 #1 Arthralgi\* or bursitis or capsulit\* or epicondylgia\* or epicondyli\* or fasciopath\* or  
48 fasciitis or fascitis or metatarsalgi\* or myalgi\* or myelitis or myopath\* or myosit\* or osteitis or  
49 osteochondritis or osteomyelitis or polymyosit\* or radiculopath\* or radiculit\* or synovit\* or  
50 tend?nopath\* or tendinit\* or tenosynovit\* or whiplash or WAD 13121

51 #2 ((ligament or tendon or supraspinatus or infraspinatus or subscapularis or teres minor or  
52 teres major or trapezius or deltoid or bicep\* or bicipital or coracobrachialis or deltoid or fibularis  
53 or talofibular or calcaneofibular or calcaneotibial or tibio\* or rotator cuff) near/3 (injur\* or  
54 impair\* or imping\* or sprain\* or strain\* or tear or torn)) 2044



- 1  
2  
3 #3 ((myofascial or neck\* or cervical\* or musculoskeletal\* or MSK or elbow\* or arm\* or  
4 finger\* or hand\* or wrist\* or forearm\* or leg or ankle\* or knee\* or hip\* or foot\* or toe\* or  
5 femur\* or radius or radii or tibia\* or ulna\* or humerus or humeri or metatarsal\* or metacarpal\*  
6 or fibula\* or patella\* or patellofemoral or carpal\* or tarsal\* or phalange\* or clavicle\* or  
7 scapula\* or bone\* or joint\* or muscle\* or shoulder\*) near/3 (sprain\* or strain\* or injur\* or  
8 impair\* or fractur\* or break\* or broken or disorder\* or pain\*)) 38249  
9  
10 #4 #1 or #2 or #3 47667  
11 #5 ((disability or function\* or recover\* or pain\* or analog\*) near/3 (measur\* or evaluat\* or  
12 scale or status or test\* or assess\* or rating\* or index or questionnaire)) 109526  
13 #6 VAS or "visual analog\*" or "numeric\* rating scale" or "point scale" or comfort\* or  
14 "Disabilities of the Arm Shoulder and Hand" or DASH or "Shoulder Pain and Disability Index"  
15 or SPDI or "mcgill pain" or BPI or "brief pain" or improvement 139538  
16 #7 ((return or resump\*) near/3 (work or sport or play or activit\*)) 3128  
17 #8 pain\*:so 8908  
18 #9 pain\*:ti 34759  
19 #10 #5 or #6 or #7 or #8 or #9 214594  
20 #11 #4 and #10 24648  
21 #12 (pain\* near/3 (chronic or dental or labo?r or back or low back or spine or spinal or  
22 lumbar or sciatic\* or cancer\*)) 20816  
23 #13 sciatica or backache or dorsalgia or lumbago or toothache or migraine or appendicitis or  
24 metastas\* 27428  
25 #14 #12 or #13 45616  
26 #15 #11 not #14 18297  
27 #16 clinic\* or practi\* or primary or physician\* or refer\* or visit\* or outpatient\* or consult\* or  
28 family or communit\* or ambulatory or centre\* or center\* or office or sport\* 937038  
29 #17 #15 and #16 in Trials, with Wounds Group, Injuries Group, Pain, Palliative and  
30 Supportive Care Group, Musculoskeletal Group, Bone, Joint and Muscle Trauma Group, Back  
31 Group or Occupational Safety and Health Group in Review Groups  
32  
33  
34  
35  
36  
37  
38  
39  
40  
41

## CINAHL

|                                                                                                                                                                                                                                                                                                  |         |
|--------------------------------------------------------------------------------------------------------------------------------------------------------------------------------------------------------------------------------------------------------------------------------------------------|---------|
| S73 S66 NOT S72                                                                                                                                                                                                                                                                                  | 5,571   |
| S72 S67 OR S68 OR S69 OR S70 OR S71                                                                                                                                                                                                                                                              | 224,577 |
| S71 (MM "Surgery, Operative+")                                                                                                                                                                                                                                                                   | 211,375 |
| S70 (MH "Arthroscopy")                                                                                                                                                                                                                                                                           | 4,418   |
| S69 (MH "Arthroplasty")                                                                                                                                                                                                                                                                          | 1,646   |
| S68 (MH "Bone Transplantation")                                                                                                                                                                                                                                                                  | 3,342   |
| S67 (MH "Osteoarthritis+")                                                                                                                                                                                                                                                                       | 13,152  |
| S66 S64 AND S65                                                                                                                                                                                                                                                                                  | 8,761   |
| S65 TI ( clinic* or practi* or primary or physician* or refer* or visit* or outpatient* or<br>consult* or family or communit* or ambulatory or centre* or center* or office or sport* ) OR<br>AB ( clinic* or practi* or primary or physician* or refer* or visit* or outpatient* or consult* or |         |

1  
2  
3  
4  
5  
6  
7  
8  
9  
10  
11  
12  
13  
14  
15  
16  
17  
18  
19  
20  
21  
22  
23  
24  
25  
26  
27  
28  
29  
30  
31  
32  
33  
34  
35  
36  
37  
38  
39  
40  
41  
42  
43  
44  
45  
46  
47  
48  
49  
50  
51  
52  
53  
54  
55  
56  
57  
58  
59  
60

|                                                                                                                                                                                                                                                      |         |
|------------------------------------------------------------------------------------------------------------------------------------------------------------------------------------------------------------------------------------------------------|---------|
| family or communit* or ambulatory or centre* or center* or office or sport* )                                                                                                                                                                        |         |
| 1,131,403                                                                                                                                                                                                                                            |         |
| S64 S51 NOT S63                                                                                                                                                                                                                                      | 15,217  |
| S63 S60 OR S61 OR S62                                                                                                                                                                                                                                | 359,216 |
| S62 TX sciatica or backache or dorsalgia or lumbago or toothache or migraine or appendicitis or metastas*                                                                                                                                            | 35,825  |
| S61 TX (pain* N3 (chronic or dental or labo?r or back or low back or spine or spinal or lumbar or sciatic* or cancer*))                                                                                                                              | 49,583  |
| S60 S52 OR S53 OR S54 OR S55 OR S56 OR S57 OR S58 OR S59                                                                                                                                                                                             | 329,798 |
| S59 (MH "Neoplasms+")                                                                                                                                                                                                                                | 240,613 |
| S58 (MH "Dentistry+")                                                                                                                                                                                                                                | 47,838  |
| S57 (MH "Headache+")                                                                                                                                                                                                                                 | 16,196  |
| S56 (MH "Toothache")                                                                                                                                                                                                                                 | 327     |
| S55 (MH "Postoperative Pain")                                                                                                                                                                                                                        | 8,206   |
| S54 (MH "Labor Pain")                                                                                                                                                                                                                                | 1,533   |
| S53 (MH "Back Pain+")                                                                                                                                                                                                                                | 18,740  |
| S52 (MH "Appendicitis")                                                                                                                                                                                                                              | 1,293   |
| S51 S17 AND S39 AND S48                                                                                                                                                                                                                              | 20,097  |
| S50 S48 AND S49                                                                                                                                                                                                                                      | 20,097  |
| S49 S17 AND S39                                                                                                                                                                                                                                      | 33,880  |
| S48 S40 OR S41 OR S42 OR S43 OR S44 OR S45 OR S46 OR S47                                                                                                                                                                                             | 457,089 |
| S47 SO pain*                                                                                                                                                                                                                                         | 30,433  |
| S46 TI pain*                                                                                                                                                                                                                                         | 68,365  |
| S45 TX ((disability or function* or recover* or pain* or analog*) N3 (measur* or evaluat* or scale or status or test* or assess* or rating* or index or questionnaire)).                                                                             | 143,200 |
| S44 TX VAS or "visual analog*" or "numeric* rating scale" or "point scale" or comfort* or "Disabilities of the Arm Shoulder and Hand" or DASH or "Shoulder Pain and Disability Index" or SPDI or "mcgill pain" or BPI or "brief pain" or improvement | 174,142 |
| S43 TX ((return or resump*) N3 (work or sport or play or activit*))                                                                                                                                                                                  | 6,311   |
| S42 (MH "Job Re-Entry") OR (MH "Sports Re-Entry") OR (MH "School Re-Entry")                                                                                                                                                                          | 6,819   |
| S41 (MH "Pain Measurement")                                                                                                                                                                                                                          | 27,842  |
| S40 (MH "Treatment Outcomes")                                                                                                                                                                                                                        | 150,811 |
| S39 S37 NOT S38                                                                                                                                                                                                                                      | 563,918 |
| S38 (MH "Animals+")                                                                                                                                                                                                                                  | 37,258  |
| S37 S24 OR S29 OR S36                                                                                                                                                                                                                                | 568,264 |
| S36 S30 OR S31 OR S32 OR S33 OR S34 OR S35                                                                                                                                                                                                           | 495,048 |
| S35 (MH "Prospective Studies+")                                                                                                                                                                                                                      | 213,854 |
| S34 (MH "Evaluation Research+")                                                                                                                                                                                                                      | 41,488  |
| S33 (MH "Comparative Studies")                                                                                                                                                                                                                       | 101,882 |
| S32 "latin square"                                                                                                                                                                                                                                   | 138     |
| S31 (MH "Study Design") OR (MH "Crossover Design") OR (MH "Experimental Studies+")                                                                                                                                                                   | 207,529 |
| S30 (MH "Random Sample+")                                                                                                                                                                                                                            | 67,305  |
| S29 S25 OR S26 OR S27 OR S28                                                                                                                                                                                                                         | 211,728 |
| S28 "random*"                                                                                                                                                                                                                                        | 203,059 |
| S27 "placebo*"                                                                                                                                                                                                                                       | 33,694  |

|    |                                                                                                        |         |
|----|--------------------------------------------------------------------------------------------------------|---------|
| 1  |                                                                                                        |         |
| 2  |                                                                                                        |         |
| 3  | S26 (MH "Placebos")                                                                                    | 8,296   |
| 4  | S25 (MH "Placebo Effect")                                                                              | 1,210   |
| 5  | S24 S18 OR S19 OR S20 OR S21 OR S22 OR S23                                                             | 195,829 |
| 6  | S23 "triple-blind"                                                                                     | 136     |
| 7  | S22 "single-blind"                                                                                     | 8,460   |
| 8  | S21 "double-blind"                                                                                     | 29,322  |
| 9  | S20 clinical W3 trial                                                                                  | 124,429 |
| 10 | S19 "randomi?ed controlled trial*"                                                                     | 69,029  |
| 11 | S18 (MH "Clinical Trials+")                                                                            | 155,173 |
| 12 | S17 S5 OR S10 OR S15                                                                                   | 132,229 |
| 13 | S16 S11 OR S15                                                                                         | 132,229 |
| 14 | S15 S12 OR S13 OR S14                                                                                  | 98,300  |
| 15 | S14 TX ((myofascial or neck* or cervical* or musculoskeletal* or MSK or elbow* or arm* or              |         |
| 16 | finger* or hand* or wrist* or forearm* or leg or ankle* or knee* or hip* or foot* or toe* or           |         |
| 17 | femur* or radius or radii or tibia* or ulna* or humerus or humeri or metatarsal* or metacarpal*        |         |
| 18 | or fibula* or patella* or patellofemoral or carpal* or tarsal* or phalange* or clavicle* or            |         |
| 19 | scapula* or bone* or joint* or muscle* or shoulder*) N3 (sprain* or strain* or injur* or impair*       |         |
| 20 | or fractur* or break* or broken or disorder* or pain*))                                                | 78,680  |
| 21 | S13 TX ((ligament or tendon or supraspinatus or infraspinatus or subscapularis or teres minor          |         |
| 22 | or teres major or trapezius or deltoid or bicep* or bicipital or coracobrachialis or deltoid or        |         |
| 23 | fibularis or talofibular or calcaneofibular or calcaneotibial or tibio* or rotator cuff) N3 (injur* or |         |
| 24 | impair* or imping* or sprain* or strain* or tear or torn))                                             | 10,622  |
| 25 | S12 TX Arthralgi* or bursitis or capsulit* or epicondylgia* or epicondylit* or fasciopath* or          |         |
| 26 | fasciitis or fascitis or metatarsalgi* or myalgi* or myelitis or myopath* or myosit* or osteitis or    |         |
| 27 | osteocondritis or osteomyelitis or polymyosit* or radiculopath* or radiculit* or synovit* or           |         |
| 28 | tend?nopath* or tendinit* or tenosynovit* or whiplash or WAD                                           | 20,095  |
| 29 | S11 S5 OR S10                                                                                          | 91,140  |
| 30 | S10 S8 AND S9                                                                                          | Display |
| 31 | S9 TI pain* OR AB pain*                                                                                | Display |
| 32 | S8 S6 OR S7                                                                                            | Display |
| 33 | S7 (MH "Musculoskeletal Diseases") OR (MH "Cartilage Diseases+") OR (MH "Fasciitis+")                  |         |
| 34 | OR (MH "Foot Diseases+") OR (MH "Golf Elbow") OR (MH "Heel Pain") OR (MH "Joint                        |         |
| 35 | Diseases") OR (MH "Muscular Diseases") OR (MH "Arthralgia+") OR (MH "Bursitis+") OR                    |         |
| 36 | (MH "Contracture+") OR (MH "Metatarsalgia") OR (MH "Shoulder Instability, Anterior") OR                |         |
| 37 | (MH "Shoulder Instability, Multidirectional") OR (MH "Shoulder Instability, Posterior") OR             |         |
| 38 | (MH "Synovitis")                                                                                       | Display |
| 39 | S6 (MH "Musculoskeletal System") OR (MH "Cartilage+") OR (MH "Fascia+") OR (MH                         |         |
| 40 | "Ligaments+") OR (MH "Muscles+") OR (MH "Bone and Bones") OR (MH "Arm Bones+")                         |         |
| 41 | OR (MH "Foot Bones+") OR (MH "Leg Bones+") OR (MH "Pelvic Bones+") OR (MH                              |         |
| 42 | "Joints+")                                                                                             | Display |
| 43 | S5 S1 OR S2 OR S3 OR S4                                                                                | Display |
| 44 | S4 (MH "Neck Pain")                                                                                    | Display |
| 45 | S3 (MH "Arthralgia+")                                                                                  | Display |
| 46 | S2 (MH "Compartment Syndromes") OR (MH "Anterior Compartment Syndrome") OR (MH                         |         |
| 47 | "Ischemic Contracture")                                                                                | Display |
| 48 |                                                                                                        |         |
| 49 |                                                                                                        |         |
| 50 |                                                                                                        |         |
| 51 |                                                                                                        |         |
| 52 |                                                                                                        |         |
| 53 |                                                                                                        |         |
| 54 |                                                                                                        |         |
| 55 |                                                                                                        |         |
| 56 |                                                                                                        |         |
| 57 |                                                                                                        |         |
| 58 |                                                                                                        |         |
| 59 |                                                                                                        |         |
| 60 |                                                                                                        |         |

1  
2  
3 S1 (MH "Arm Injuries+") OR (MH "Athletic Injuries+") OR (MH "Dislocations+") OR (MH  
4 "Fractures+") OR (MH "Hand Injuries+") OR (MH "Leg Injuries+") OR (MH "Ligament  
5 Injuries+") OR (MH "Neck Injuries+") OR (MH "Occupational-Related Injuries") OR (MH  
6 "Soft Tissue Injuries+") OR (MH "Sprains and Strains+") OR (MH "Tendon Injuries+")  
7  
8 Display  
9

10  
11 PEDro, yields 645  
12

13 March 13, 2018  
14

15  
16 Abstract & Title: acute  
17 AND  
18 Problem: pain  
19 AND  
20 Method: Clinical trial  
21  
22  
23  
24  
25  
26  
27  
28  
29  
30  
31  
32  
33  
34  
35  
36  
37  
38  
39  
40  
41  
42  
43  
44  
45  
46  
47  
48  
49  
50  
51  
52  
53  
54  
55  
56  
57  
58  
59  
60

# Reporting checklist for protocol of a systematic review.

Based on the PRISMA-P guidelines.

## Instructions to authors

Complete this checklist by entering the page numbers from your manuscript where readers will find each of the items listed below.

Your article may not currently address all the items on the checklist. Please modify your text to include the missing information. If you are certain that an item does not apply, please write "n/a" and provide a short explanation.

Upload your completed checklist as an extra file when you submit to a journal.

In your methods section, say that you used the PRISMA-P reporting guidelines, and cite them as:

Moher D, Shamseer L, Clarke M, Ghersi D, Liberati A, Petticrew M, Shekelle P, Stewart LA. Preferred Reporting Items for Systematic Review and Meta-Analysis Protocols (PRISMA-P) 2015 statement. *Syst Rev.* 2015;4(1):1.

|                |     | Reporting Item                                                                                                                                                              | Page Number |
|----------------|-----|-----------------------------------------------------------------------------------------------------------------------------------------------------------------------------|-------------|
| Identification | #1a | Identify the report as a protocol of a systematic review                                                                                                                    | 1           |
| Update         | #1b | If the protocol is for an update of a previous systematic review, identify as such                                                                                          | N/A         |
|                | #2  | If registered, provide the name of the registry (such as PROSPERO) and registration number                                                                                  | 4 & 8       |
| Contact        | #3a | Provide name, institutional affiliation, e-mail address of all protocol authors; provide physical mailing address of corresponding author                                   | 1           |
| Contribution   | #3b | Describe contributions of protocol authors and identify the guarantor of the review                                                                                         | 18          |
|                | #4  | If the protocol represents an amendment of a previously completed or published protocol, identify as such and list changes; otherwise, state plan for documenting important | 16          |

|    |                      |      |                                                                   |        |
|----|----------------------|------|-------------------------------------------------------------------|--------|
| 1  |                      |      | protocol amendments                                               |        |
| 2  | Sources              | #5a  | Indicate sources of financial or other support for the review     | 18     |
| 3  |                      |      |                                                                   |        |
| 4  | Sponsor              | #5b  | Provide name for the review funder and / or sponsor               | 18     |
| 5  |                      |      |                                                                   |        |
| 6  |                      |      |                                                                   |        |
| 7  | Role of sponsor or   | #5c  | Describe roles of funder(s), sponsor(s), and / or institution(s), | 18     |
| 8  | funder               |      | if any, in developing the protocol                                |        |
| 9  |                      |      |                                                                   |        |
| 10 |                      |      |                                                                   |        |
| 11 | Rationale            | #6   | Describe the rationale for the review in the context of what is   | 6      |
| 12 |                      |      | already known                                                     |        |
| 13 |                      |      |                                                                   |        |
| 14 | Objectives           | #7   | Provide an explicit statement of the question(s) the review will  | 7      |
| 15 |                      |      | address with reference to participants, interventions,            |        |
| 16 |                      |      | comparators, and outcomes (PICO)                                  |        |
| 17 |                      |      |                                                                   |        |
| 18 |                      |      |                                                                   |        |
| 19 |                      |      |                                                                   |        |
| 20 | Eligibility criteria | #8   | Specify the study characteristics (such as PICO, study design,    | 8 & 9  |
| 21 |                      |      | setting, time frame) and report characteristics (such as years    |        |
| 22 |                      |      | considered, language, publication status) to be used as           |        |
| 23 |                      |      | criteria for eligibility for the review                           |        |
| 24 |                      |      |                                                                   |        |
| 25 |                      |      |                                                                   |        |
| 26 |                      |      |                                                                   |        |
| 27 | Information          | #9   | Describe all intended information sources (such as electronic     | 8      |
| 28 | sources              |      | databases, contact with study authors, trial registers or other   |        |
| 29 |                      |      | grey literature sources) with planned dates of coverage           |        |
| 30 |                      |      |                                                                   |        |
| 31 |                      |      |                                                                   |        |
| 32 | Search strategy      | #10  | Present draft of search strategy to be used for at least one      | 25-32  |
| 33 |                      |      | electronic database, including planned limits, such that it       |        |
| 34 |                      |      | could be repeated                                                 |        |
| 35 |                      |      |                                                                   |        |
| 36 |                      |      |                                                                   |        |
| 37 | Study records -      | #11a | Describe the mechanism(s) that will be used to manage             | 9      |
| 38 | data management      |      | records and data throughout the review                            |        |
| 39 |                      |      |                                                                   |        |
| 40 |                      |      |                                                                   |        |
| 41 | Study records -      | #11b | State the process that will be used for selecting studies (such   | 9      |
| 42 | selection process    |      | as two independent reviewers) through each phase of the           |        |
| 43 |                      |      | review (that is, screening, eligibility and inclusion in meta-    |        |
| 44 |                      |      | analysis)                                                         |        |
| 45 |                      |      |                                                                   |        |
| 46 |                      |      |                                                                   |        |
| 47 |                      |      |                                                                   |        |
| 48 | Study records -      | #11c | Describe planned method of extracting data from reports           | 9 & 10 |
| 49 | data collection      |      | (such as piloting forms, done independently, in duplicate), any   |        |
| 50 | process              |      | processes for obtaining and confirming data from investigators    |        |
| 51 |                      |      |                                                                   |        |
| 52 |                      |      |                                                                   |        |
| 53 | Data items           | #12  | List and define all variables for which data will be sought       | 9 & 10 |
| 54 |                      |      | (such as PICO items, funding sources), any pre-planned data       |        |
| 55 |                      |      | assumptions and simplifications                                   |        |
| 56 |                      |      |                                                                   |        |
| 57 |                      |      |                                                                   |        |
| 58 |                      |      |                                                                   |        |
| 59 |                      |      |                                                                   |        |
| 60 |                      |      |                                                                   |        |

|    |                    |      |                                                                                 |         |
|----|--------------------|------|---------------------------------------------------------------------------------|---------|
| 1  | Outcomes and       | #13  | List and define all outcomes for which data will be sought,                     | 9 & 10  |
| 2  | prioritization     |      | including prioritization of main and additional outcomes, with                  |         |
| 3  |                    |      | rationale                                                                       |         |
| 4  |                    |      |                                                                                 |         |
| 5  |                    |      |                                                                                 |         |
| 6  | Risk of bias in    | #14  | Describe anticipated methods for assessing risk of bias of                      | 10      |
| 7  | individual studies |      | individual studies, including whether this will be done at the                  |         |
| 8  |                    |      | outcome or study level, or both; state how this information will                |         |
| 9  |                    |      | be used in data synthesis                                                       |         |
| 10 |                    |      |                                                                                 |         |
| 11 |                    |      |                                                                                 |         |
| 12 |                    |      |                                                                                 |         |
| 13 | Data synthesis     | #15a | Describe criteria under which study data will be quantitatively                 | 10 & 11 |
| 14 |                    |      | synthesised                                                                     |         |
| 15 |                    |      |                                                                                 |         |
| 16 |                    |      |                                                                                 |         |
| 17 |                    | #15b | If data are appropriate for quantitative synthesis, describe                    | 10-14   |
| 18 |                    |      | planned summary measures, methods of handling data and                          |         |
| 19 |                    |      | methods of combining data from studies, including any                           |         |
| 20 |                    |      | planned exploration of consistency (such as I <sup>2</sup> , Kendall's $\tau$ ) |         |
| 21 |                    |      |                                                                                 |         |
| 22 |                    |      |                                                                                 |         |
| 23 |                    |      |                                                                                 |         |
| 24 |                    | #15c | Describe any proposed additional analyses (such as                              | 14      |
| 25 |                    |      | sensitivity or subgroup analyses, meta-regression)                              |         |
| 26 |                    |      |                                                                                 |         |
| 27 |                    |      |                                                                                 |         |
| 28 |                    | #15d | If quantitative synthesis is not appropriate, describe the type                 | N/A     |
| 29 |                    |      | of summary planned                                                              |         |
| 30 |                    |      |                                                                                 |         |
| 31 | Meta-bias(es)      | #16  | Specify any planned assessment of meta-bias(es) (such as                        | 14      |
| 32 |                    |      | publication bias across studies, selective reporting within                     |         |
| 33 |                    |      | studies)                                                                        |         |
| 34 |                    |      |                                                                                 |         |
| 35 |                    |      |                                                                                 |         |
| 36 |                    |      |                                                                                 |         |
| 37 | Confidence in      | #17  | Describe how the strength of the body of evidence will be                       | 14 & 15 |
| 38 | cumulative         |      | assessed (such as GRADE)                                                        |         |
| 39 | evidence           |      |                                                                                 |         |
| 40 |                    |      |                                                                                 |         |
| 41 |                    |      |                                                                                 |         |

42 The PRISMA-P checklist is distributed under the terms of the Creative Commons Attribution License  
 43 CC-BY 4.0. This checklist was completed on 25. May 2018 using <http://www.goodreports.org/>, a tool  
 44 made by the [EQUATOR Network](#) in collaboration with [Penelope.ai](#)  
 45  
 46  
 47  
 48  
 49  
 50  
 51  
 52  
 53  
 54  
 55  
 56  
 57  
 58  
 59  
 60
