# Supplementary material for: Management of acute musculoskeletal pain (excluding low back pain): protocol for a systematic review and network meta-analysis of randomised trials
Source: PubMed Central journal article supplement — BMJ Open. 2019 Apr 3;9(4):e024441. doi: 10.1136/bmjopen-2018-024441 (PMC6500323; doi:10.1136/bmjopen-2018-024441), 2019-04-03
Supplement: bmjopen-2018-024441supp001.pdf [file bmjopen-2018-024441supp001.pdf]

## Appendix: Literature Search Strategies

Summary of search and strategies ACP Acute MSK Pain

Feb 14, 2018

Database: OVID Medline Epub Ahead of Print, In-Process & Other Non-Indexed Citations, Ovid MEDLINE(R) Daily and Ovid MEDLINE(R) 1946 to Present

Search Strategy:

- 
- 1 exp arm injuries/ or athletic injuries/ or exp joint dislocations/ or exp fractures, bone/ or fractures, cartilage/ or exp hand injuries/ or exp hip injuries/ or exp leg injuries/ or exp neck injuries/ or occupational injuries/ or exp shoulder injuries/ or exp soft tissue injuries/ or exp "sprains and strains"/ or exp tendon injuries/ or exp Compartment Syndromes/ or exp Bone Malalignment/ (300813)
  - 2 (exp Musculoskeletal system/ or musculoskeletal diseases/ or osteitis/ or exp cartilage diseases/ or exp fasciitis/ or exp bursitis/ or exp metatarsalgia/ or exp synovitis/ or muscle cramp/ or myalgia/ or exp tendinopathy/) and pain\*.ti,ab. (87772)
  - 3 Musculoskeletal Pain/ or Neck Pain/ or Acute Pain/ or exp Arthralgia/ (19422)
  - 4 (Arthralgi\* or bursitis or capsulit\* or epicondylalgia\* or epicondylit\* or fasciopath\* or fasciitis or fascitis or metatarsalgi\* or myalgi\* or myelitis or myopath\* or myosit\* or osteitis or osteochondritis or osteomyelitis or polymyositis\* or radiculopath\* or radiculit\* or synovit\* or tend?nopath\* or tendinit\* or tenosynovit\* or whiplash or WAD).tw. (111653)
  - 5 ((ligament or tendon or supraspinatus or infraspinatus or subscapularis or teres minor or teres major or trapezius or deltoid or bicep\* or bicipital or coracobrachialis or deltoid or fibularis or talofibular or calcaneofibular or calcaneotibial or tibio\* or rotator cuff) adj3 (injur\* or impair\* or imping\* or sprain\* or strain\* or tear or torn)).tw. (14400)
  - 6 ((myofascial or neck\* or cervical\* or musculoskeletal\* or MSK or elbow\* or arm\* or finger\* or hand\* or wrist\* or forearm\* or leg or ankle\* or knee\* or hip\* or foot\* or toe\* or femur\* or radius or radii or tibia\* or ulna\* or humerus or humeri or metatarsal\* or metacarpal\* or fibula\* or patella\* or patellofemoral or carpal\* or tarsal\* or phalange\* or clavicle\* or scapula\* or bone\* or joint\* or muscle\* or shoulder\*) adj3 (sprain\* or strain\* or injur\* or impair\* or fractur\* or break\* or broken or disorder\* or pain\*)).tw. (235481)
  - 7 or/1-6 (587971)
  - 8 randomized controlled trial.pt. or randomi?ed.mp. or placebo.mp. (810530)
  - 9 ((treatment or control) adj3 group\*).ab. (511607)
  - 10 (allocat\* adj5 group\*).ab. (20402)
  - 11 ((clinical or control\*) adj3 trial).ti,ab,kw. (226548)
  - 12 or/8-11 (1258485)
  - 13 7 and 12 (46565)
  - 14 exp animals/ not humans.sh. (4424690)
  - 15 13 not 14 (42705)
  - 16 adult.mp. or middle aged.sh. or age:.tw. (8090446)
  - 17 15 and 16 (30798)
  - 18 limit 15 to "all adult (19 plus years)" (28434)
  - 19 17 or 18 (31999)
  - 20 treatment outcome/ (824861)
  - 21 Pain Measurement/ (75370)

- 22 "Recovery of Function"/ (42703)
- 23 ((disability or function\* or recover\* or pain\* or analog\*) adj3 (measur\* or evaluat\* or scale or status or test\* or assess\* or rating\* or index or questionnaire)).mp. (586581)
- 24 (VAS or "visual analog\*" or "numeric\* rating scale" or "point scale" or comfort\* or "Disabilities of the Arm Shoulder and Hand" or DASH or "Shoulder Pain and Disability Index" or SPDI or "mcgill pain" or BPI or "brief pain" or improvement).mp. (628803)
- 25 Return to Work/ or Return to Sport/ or ((return or resump\*) adj3 (work or sport or play or activit\*)).mp. (16520)
- 26 pain\*.jw,ti. (199639)
- 27 pain\*.ab. /freq=2 (243208)
- 28 or/20-27 (2035376)
- 29 19 and 28 (20709)
- 30 exp appendicitis/ or exp Back Pain/ or Labor Pain/ or exp Pain, Postoperative/ or exp Toothache/ or headache/ or exp Headache disorders/ or exp dentistry/ or exp Neoplasms/ (3499077)
- 31 (pain\* adj3 (chronic or dental or labo?r or back or low back or spine or spinal or lumbar or sciatic\* or cancer\*)).mp. (118740)
- 32 (sciatica or backache or dorsalgia or lumbago or toothache or migraine or appendicitis or metastas\*).mp. (463484)
- 33 or/30-32 (3631063)
- 34 29 not 33 (13769)
- 35 (clinic\* or practi\* or primary or physician\* or refer\* or visit\* or outpatient\* or consult\* or family or communit\* or ambulatory or centre\* or center\* or office or sport\*).ti,ab. (7012189)
- 36 34 and 35 (9481)
- 37 Osteoarthritis/ (33247)
- 38 exp arthroplasty/ or exp arthroscopy/ or bone transplanted/ (101224)
- 39 su.fs. (1807708)
- 40 or/37-39 (1863671)

Feb 14, 2018

Database: Embase <1974 to 2018 February 13>

Search Strategy:

-----

1 limb injury/ or exp arm injury/ or exp leg injury/ or exp limb fracture/ or sport injury/ or exp joint injury/ or musculoskeletal injury/ or exp cartilage injury/ or exp "ligament and tendon injury"/ or medial tibial stress syndrome/ or muscle injury/ or overexertion/ or exp sprain/ or fracture/ or avulsion fracture/ or clavicle fracture/ or comminuted fracture/ or fracture dislocation/ or exp fracture healing/ or intraarticular fracture/ or exp joint fracture/ or exp limb fracture/ or exp multiple fracture/ or exp scapula fracture/ or stress fracture/ or neck injury/ or whiplash injury/ or occupational accident/ or soft tissue injury/ or compartment syndrome/ (382802)

Annotation: includes arm injury/ or exp arm fracture/ or elbow dislocation/ or elbow injury/ or exp forearm injury/ or exp hand injury/ or exp shoulder injury/ or exp wrist injury/ or leg injury/ or exp ankle injury/ or exp foot injury/ or exp hip injury/ or exp knee injury/ or exp leg fracture/ or tibia torsion/ or exp ankle injury/ or exp dislocation/ or exp hip injury/ or intraarticular

fracture/ or exp joint fracture/ or exp knee injury/ or posttraumatic arthropathy/ or exp wrist injury/

2 (exp musculoskeletal system/ or exp musculoskeletal disease/) and pain\*.ti,ab. (312623)

3 musculoskeletal pain/ or neck pain/ or shoulder pain/ or arthralgia/ (86878)

4 or/1-3 (692780)

Annotation: emtree terms condition MSK pain

5 (Arthralgi\* or bursitis or capsulit\* or epicondylgia\* or epicondylit\* or fasciopath\* or fasciitis or fascitis or metatarsalgi\* or myalgi\* or myelitis or myopath\* or myosit\* or osteitis or osteochondritis or osteomyelitis or polymyositis\* or radiculopath\* or radiculit\* or synovit\* or tend?nopath\* or tendinit\* or tenosynovit\* or whiplash or WAD).tw. (147804)

6 ((ligament or tendon or supraspinatus or infraspinatus or subscapularis or teres minor or teres major or trapezius or deltoid or bicep\* or bicipital or coracobrachialis or deltoid or fibularis or talofibular or calcaneofibular or calcaneotibial or tibio\* or rotator cuff) adj3 (injur\* or impair\* or imping\* or sprain\* or strain\* or tear or torn)).tw. (16617)

7 ((myofascial or neck\* or cervical\* or musculoskeletal\* or MSK or elbow\* or arm\* or finger\* or hand\* or wrist\* or forearm\* or leg or ankle\* or knee\* or hip\* or foot\* or toe\* or femur\* or radius or radii or tibia\* or ulna\* or humerus or humeri or metatarsal\* or metacarpal\* or fibula\* or patella\* or patellofemoral or carpal\* or tarsal\* or phalange\* or clavicle\* or scapula\* or bone\* or joint\* or muscle\* or shoulder\*) adj3 (sprain\* or strain\* or injur\* or impair\* or fractur\* or break\* or broken or disorder\* or pain\*)).tw. (305948)

8 or/5-7 (444822)

Annotation: free text terms condition MSK pain

9 4 or 8 (897318)

Annotation: MSK pain

10 exp animals/ or exp invertebrate/ or animal experiment/ or animal model/ or animal tissue/ or animal cell/ or nonhuman/ (25540585)

11 human/ or normal human/ or human cell/ (19287963)

12 10 and 11 (19240053)

13 10 not 12 (6300532)

14 9 not 13 (837728)

15 random:.tw. or placebo:.mp. or double-blind:.tw. (1509046)

Annotation: HIRU specific RCT filter

16 ((treatment or control) adj3 group\*).ab. (723604)

17 (allocat\* adj5 group\*).ab. (26448)

18 ((clinical or control\*) adj3 trial).ti,ab,kw. (327340)

19 or/15-18 (2107446)

Annotation: modified RCT filter

20 14 and 19 (95790)

Annotation: MSK pain with mod RCT filter

21 treatment outcome/ (762155)

22 outcome assessment/ (400641)

23 pain measurement/ (4687)

24 exp pain assessment/ (134012)

25 convalescence/ (42381)

26 return to sport/ or return to work/ (4870)

27 work resumption/ (3467)

28 ((disability or function\* or recover\* or pain\* or analog\*) adj3 (measur\* or evaluat\* or scale or status or test\* or assess\* or rating\* or index or questionnaire)).mp. (790797)  
29 (VAS or "visual analog\*" or "numeric\* rating scale" or "point scale" or comfort\* or "Disabilities of the Arm Shoulder and Hand" or DASH or "Shoulder Pain and Disability Index" or SPDI or "mcgill pain" or BPI or "brief pain" or improvement).mp. (911685)  
30 ((return or resump\*) adj3 (work or sport or play or activit\*)).mp. (23514)  
31 pain\*.jw,ti. (269095)  
32 pain\*.ab. /freq=2 (358966)  
33 or/21-32 (2816037)  
34 20 and 33 (58373)

Annotation: MSK pain with mod RCT and outcome

35 exp appendicitis/ or exp backache/ or labor pain/ or exp postoperative complication/ or exp tooth disease/ or headache/ or exp dentistry/ or exp malignant neoplasm/ or exp metastasis/ (4067682)

36 (pain\* adj3 (chronic or dental or labo?r or back or low back or spine or spinal or lumbar or sciatic\* or cancer\*)).mp. (189693)

37 (sciatica or backache or dorsalgia or lumbago or toothache or migraine or metastas\* or appendicitis).mp. (778837)

38 35 or 36 or 37 (4238484)

39 34 not 38 (30664)

Annotation: mod RCT set

40 (clinic\* or practi\* or primary or physician\* or refer\* or visit\* or outpatient\* or consult\* or family or communit\* or ambulatory or centre\* or center\* or office or sport\*).ti,ab. (9180696)

Annotation: Gill 2014 primary care plus sport

41 39 and 40 (21784)

42 exp osteoarthritis/ (110006)

43 bone transplantation/ or exp bone graft/ (46349)

44 exp orthopedic surgery/ (406039)

Annotation: includes exp joint surgery/ or exp arthroplasty/

45 su.fs. (1950489)

46 or/42-45 (2224706)

Cochrane Library

Search Name: 2017-08-22 ACP acute msk pain search

Date Run: 14/02/18 20:52:03.682

Description:

ID Search Hits

#1 Arthralgi\* or bursitis or capsulit\* or epicondylgia\* or epicondyli\* or fasciopath\* or fasciitis or fascitis or metatarsalgi\* or myalgi\* or myelitis or myopath\* or myosit\* or osteitis or osteochondritis or osteomyelitis or polymyosit\* or radiculopath\* or radiculit\* or synovit\* or tend?nopath\* or tendinit\* or tenosynovit\* or whiplash or WAD 13121

#2 ((ligament or tendon or supraspinatus or infraspinatus or subscapularis or teres minor or teres major or trapezius or deltoid or bicep\* or bicipital or coracobrachialis or deltoid or fibularis or talofibular or calcaneofibular or calcaneotibial or tibio\* or rotator cuff) near/3 (injur\* or impair\* or imping\* or sprain\* or strain\* or tear or torn)) 2044

- #3 ((myofascial or neck\* or cervical\* or musculoskeletal\* or MSK or elbow\* or arm\* or finger\* or hand\* or wrist\* or forearm\* or leg or ankle\* or knee\* or hip\* or foot\* or toe\* or femur\* or radius or radii or tibia\* or ulna\* or humerus or humeri or metatarsal\* or metacarpal\* or fibula\* or patella\* or patellofemoral or carpal\* or tarsal\* or phalange\* or clavicle\* or scapula\* or bone\* or joint\* or muscle\* or shoulder\*) near/3 (sprain\* or strain\* or injur\* or impair\* or fractur\* or break\* or broken or disorder\* or pain\*)) 38249
- #4 #1 or #2 or #3 47667
- #5 ((disability or function\* or recover\* or pain\* or analog\*) near/3 (measur\* or evaluat\* or scale or status or test\* or assess\* or rating\* or index or questionnaire)) 109526
- #6 VAS or "visual analog\*" or "numeric\* rating scale" or "point scale" or comfort\* or "Disabilities of the Arm Shoulder and Hand" or DASH or "Shoulder Pain and Disability Index" or SPDI or "mcgill pain" or BPI or "brief pain" or improvement 139538
- #7 ((return or resump\*) near/3 (work or sport or play or activit\*)) 3128
- #8 pain\*:so 8908
- #9 pain\*:ti 34759
- #10 #5 or #6 or #7 or #8 or #9 214594
- #11 #4 and #10 24648
- #12 (pain\* near/3 (chronic or dental or labo?r or back or low back or spine or spinal or lumbar or sciatic\* or cancer\*)) 20816
- #13 sciatica or backache or dorsalgia or lumbago or toothache or migraine or appendicitis or metastas\* 27428
- #14 #12 or #13 45616
- #15 #11 not #14 18297
- #16 clinic\* or practi\* or primary or physician\* or refer\* or visit\* or outpatient\* or consult\* or family or communit\* or ambulatory or centre\* or center\* or office or sport\* 937038
- #17 #15 and #16 in Trials, with Wounds Group, Injuries Group, Pain, Palliative and Supportive Care Group, Musculoskeletal Group, Bone, Joint and Muscle Trauma Group, Back Group or Occupational Safety and Health Group in Review Groups

## CINAHL

|                                                                                                                                                                                                                                                                                            |         |
|--------------------------------------------------------------------------------------------------------------------------------------------------------------------------------------------------------------------------------------------------------------------------------------------|---------|
| S73 S66 NOT S72                                                                                                                                                                                                                                                                            | 5,571   |
| S72 S67 OR S68 OR S69 OR S70 OR S71                                                                                                                                                                                                                                                        | 224,577 |
| S71 (MM "Surgery, Operative+")                                                                                                                                                                                                                                                             | 211,375 |
| S70 (MH "Arthroscopy")                                                                                                                                                                                                                                                                     | 4,418   |
| S69 (MH "Arthroplasty")                                                                                                                                                                                                                                                                    | 1,646   |
| S68 (MH "Bone Transplantation")                                                                                                                                                                                                                                                            | 3,342   |
| S67 (MH "Osteoarthritis+")                                                                                                                                                                                                                                                                 | 13,152  |
| S66 S64 AND S65                                                                                                                                                                                                                                                                            | 8,761   |
| S65 TI ( clinic* or practi* or primary or physician* or refer* or visit* or outpatient* or consult* or family or communit* or ambulatory or centre* or center* or office or sport* ) OR AB ( clinic* or practi* or primary or physician* or refer* or visit* or outpatient* or consult* or |         |

|                                                                                                                                                                                                                                                      |         |
|------------------------------------------------------------------------------------------------------------------------------------------------------------------------------------------------------------------------------------------------------|---------|
| family or communit* or ambulatory or centre* or center* or office or sport* )                                                                                                                                                                        |         |
| 1,131,403                                                                                                                                                                                                                                            |         |
| S64 S51 NOT S63                                                                                                                                                                                                                                      | 15,217  |
| S63 S60 OR S61 OR S62                                                                                                                                                                                                                                | 359,216 |
| S62 TX sciatica or backache or dorsalgia or lumbago or toothache or migraine or appendicitis or metastas*                                                                                                                                            | 35,825  |
| S61 TX (pain* N3 (chronic or dental or labo?r or back or low back or spine or spinal or lumbar or sciatic* or cancer*))                                                                                                                              | 49,583  |
| S60 S52 OR S53 OR S54 OR S55 OR S56 OR S57 OR S58 OR S59                                                                                                                                                                                             | 329,798 |
| S59 (MH "Neoplasms+")                                                                                                                                                                                                                                | 240,613 |
| S58 (MH "Dentistry+")                                                                                                                                                                                                                                | 47,838  |
| S57 (MH "Headache+")                                                                                                                                                                                                                                 | 16,196  |
| S56 (MH "Toothache")                                                                                                                                                                                                                                 | 327     |
| S55 (MH "Postoperative Pain")                                                                                                                                                                                                                        | 8,206   |
| S54 (MH "Labor Pain")                                                                                                                                                                                                                                | 1,533   |
| S53 (MH "Back Pain+")                                                                                                                                                                                                                                | 18,740  |
| S52 (MH "Appendicitis")                                                                                                                                                                                                                              | 1,293   |
| S51 S17 AND S39 AND S48                                                                                                                                                                                                                              | 20,097  |
| S50 S48 AND S49                                                                                                                                                                                                                                      | 20,097  |
| S49 S17 AND S39                                                                                                                                                                                                                                      | 33,880  |
| S48 S40 OR S41 OR S42 OR S43 OR S44 OR S45 OR S46 OR S47                                                                                                                                                                                             | 457,089 |
| S47 SO pain*                                                                                                                                                                                                                                         | 30,433  |
| S46 TI pain*                                                                                                                                                                                                                                         | 68,365  |
| S45 TX ((disability or function* or recover* or pain* or analog*) N3 (measur* or evaluat* or scale or status or test* or assess* or rating* or index or questionnaire)).                                                                             | 143,200 |
| S44 TX VAS or "visual analog*" or "numeric* rating scale" or "point scale" or comfort* or "Disabilities of the Arm Shoulder and Hand" or DASH or "Shoulder Pain and Disability Index" or SPDI or "mcgill pain" or BPI or "brief pain" or improvement | 174,142 |
| S43 TX ((return or resump*) N3 (work or sport or play or activit*))                                                                                                                                                                                  | 6,311   |
| S42 (MH "Job Re-Entry") OR (MH "Sports Re-Entry") OR (MH "School Re-Entry")                                                                                                                                                                          | 6,819   |
| S41 (MH "Pain Measurement")                                                                                                                                                                                                                          | 27,842  |
| S40 (MH "Treatment Outcomes")                                                                                                                                                                                                                        | 150,811 |
| S39 S37 NOT S38                                                                                                                                                                                                                                      | 563,918 |
| S38 (MH "Animals+")                                                                                                                                                                                                                                  | 37,258  |
| S37 S24 OR S29 OR S36                                                                                                                                                                                                                                | 568,264 |
| S36 S30 OR S31 OR S32 OR S33 OR S34 OR S35                                                                                                                                                                                                           | 495,048 |
| S35 (MH "Prospective Studies+")                                                                                                                                                                                                                      | 213,854 |
| S34 (MH "Evaluation Research+")                                                                                                                                                                                                                      | 41,488  |
| S33 (MH "Comparative Studies")                                                                                                                                                                                                                       | 101,882 |
| S32 "latin square"                                                                                                                                                                                                                                   | 138     |
| S31 (MH "Study Design") OR (MH "Crossover Design") OR (MH "Experimental Studies+")                                                                                                                                                                   | 207,529 |
| S30 (MH "Random Sample+")                                                                                                                                                                                                                            | 67,305  |
| S29 S25 OR S26 OR S27 OR S28                                                                                                                                                                                                                         | 211,728 |
| S28 "random*"                                                                                                                                                                                                                                        | 203,059 |
| S27 "placebo*"                                                                                                                                                                                                                                       | 33,694  |

|                                                                                                                                                                                                                                                                                                                                                                                                                                                                                                                                             |         |
|---------------------------------------------------------------------------------------------------------------------------------------------------------------------------------------------------------------------------------------------------------------------------------------------------------------------------------------------------------------------------------------------------------------------------------------------------------------------------------------------------------------------------------------------|---------|
| S26 (MH "Placebos")                                                                                                                                                                                                                                                                                                                                                                                                                                                                                                                         | 8,296   |
| S25 (MH "Placebo Effect")                                                                                                                                                                                                                                                                                                                                                                                                                                                                                                                   | 1,210   |
| S24 S18 OR S19 OR S20 OR S21 OR S22 OR S23                                                                                                                                                                                                                                                                                                                                                                                                                                                                                                  | 195,829 |
| S23 "triple-blind"                                                                                                                                                                                                                                                                                                                                                                                                                                                                                                                          | 136     |
| S22 "single-blind"                                                                                                                                                                                                                                                                                                                                                                                                                                                                                                                          | 8,460   |
| S21 "double-blind"                                                                                                                                                                                                                                                                                                                                                                                                                                                                                                                          | 29,322  |
| S20 clinical W3 trial                                                                                                                                                                                                                                                                                                                                                                                                                                                                                                                       | 124,429 |
| S19 "randomi?ed controlled trial*"                                                                                                                                                                                                                                                                                                                                                                                                                                                                                                          | 69,029  |
| S18 (MH "Clinical Trials+")                                                                                                                                                                                                                                                                                                                                                                                                                                                                                                                 | 155,173 |
| S17 S5 OR S10 OR S15                                                                                                                                                                                                                                                                                                                                                                                                                                                                                                                        | 132,229 |
| S16 S11 OR S15                                                                                                                                                                                                                                                                                                                                                                                                                                                                                                                              | 132,229 |
| S15 S12 OR S13 OR S14                                                                                                                                                                                                                                                                                                                                                                                                                                                                                                                       | 98,300  |
| S14 TX ((myofascial or neck* or cervical* or musculoskeletal* or MSK or elbow* or arm* or finger* or hand* or wrist* or forearm* or leg or ankle* or knee* or hip* or foot* or toe* or femur* or radius or radii or tibia* or ulna* or humerus or humeri or metatarsal* or metacarpal* or fibula* or patella* or patellofemoral or carpal* or tarsal* or phalange* or clavicle* or scapula* or bone* or joint* or muscle* or shoulder*) N3 (sprain* or strain* or injur* or impair* or fractur* or break* or broken or disorder* or pain*)) | 78,680  |
| S13 TX ((ligament or tendon or supraspinatus or infraspinatus or subscapularis or teres minor or teres major or trapezius or deltoid or bicep* or bicipital or coracobrachialis or deltoid or fibularis or talofibular or calcaneofibular or calcaneotibial or tibio* or rotator cuff) N3 (injur* or impair* or imping* or sprain* or strain* or tear or torn))                                                                                                                                                                             | 10,622  |
| S12 TX Arthralgi* or bursitis or capsulit* or epicondylalgia* or epicondylit* or fasciopath* or fasciitis or fascitis or metatarsalgi* or myalgi* or myelitis or myopath* or myosit* or osteitis or osteochondritis or osteomyelitis or polymyosit* or radiculopath* or radiculit* or synovit* or tend?nopath* or tendinit* or tenosynovit* or whiplash or WAD                                                                                                                                                                              | 20,095  |
| S11 S5 OR S10                                                                                                                                                                                                                                                                                                                                                                                                                                                                                                                               | 91,140  |
| S10 S8 AND S9                                                                                                                                                                                                                                                                                                                                                                                                                                                                                                                               | Display |
| S9 TI pain* OR AB pain*                                                                                                                                                                                                                                                                                                                                                                                                                                                                                                                     | Display |
| S8 S6 OR S7                                                                                                                                                                                                                                                                                                                                                                                                                                                                                                                                 | Display |
| S7 (MH "Musculoskeletal Diseases") OR (MH "Cartilage Diseases+") OR (MH "Fasciitis+") OR (MH "Foot Diseases+") OR (MH "Golf Elbow") OR (MH "Heel Pain") OR (MH "Joint Diseases") OR (MH "Muscular Diseases") OR (MH "Arthralgia+") OR (MH "Bursitis+") OR (MH "Contracture+") OR (MH "Metatarsalgia") OR (MH "Shoulder Instability, Anterior") OR (MH "Shoulder Instability, Multidirectional") OR (MH "Shoulder Instability, Posterior") OR (MH "Synovitis")                                                                               | Display |
| S6 (MH "Musculoskeletal System") OR (MH "Cartilage+") OR (MH "Fascia+") OR (MH "Ligaments+") OR (MH "Muscles+") OR (MH "Bone and Bones") OR (MH "Arm Bones+") OR (MH "Foot Bones+") OR (MH "Leg Bones+") OR (MH "Pelvic Bones+") OR (MH "Joints+")                                                                                                                                                                                                                                                                                          | Display |
| S5 S1 OR S2 OR S3 OR S4                                                                                                                                                                                                                                                                                                                                                                                                                                                                                                                     | Display |
| S4 (MH "Neck Pain")                                                                                                                                                                                                                                                                                                                                                                                                                                                                                                                         | Display |
| S3 (MH "Arthralgia+")                                                                                                                                                                                                                                                                                                                                                                                                                                                                                                                       | Display |
| S2 (MH "Compartment Syndromes") OR (MH "Anterior Compartment Syndrome") OR (MH "Ischemic Contracture")                                                                                                                                                                                                                                                                                                                                                                                                                                      | Display |

S1 (MH "Arm Injuries+") OR (MH "Athletic Injuries+") OR (MH "Dislocations+") OR (MH "Fractures+") OR (MH "Hand Injuries+") OR (MH "Leg Injuries+") OR (MH "Ligament Injuries+") OR (MH "Neck Injuries+") OR (MH "Occupational-Related Injuries") OR (MH "Soft Tissue Injuries+") OR (MH "Sprains and Strains+") OR (MH "Tendon Injuries+")  
Display

PEDro, yields 645

March 13, 2018

Abstract & Title: acute

AND

Problem: pain

AND

Method: Clinical trial
